# Supplementary material
Source: PubMed Central journal article supplement (PMC7062231)
Supplement: NIHMS1556514-supplement-supplementary_material.pdf [file NIHMS1556514-supplement-supplementary_material.pdf]

In the format provided by the authors and unedited.

# A natural experiment study of the effects of imprisonment on violence in the community

David J. Harding <sup>1,2\*</sup>, Jeffrey D. Morenoff<sup>3,4</sup>, Anh P. Nguyen <sup>5</sup>, Shawn D. Bushway<sup>6</sup> and Ingrid A. Binswanger<sup>5,7</sup>

---

<sup>1</sup>Department of Sociology, University of California, Berkeley, Berkeley, CA, USA. <sup>2</sup>Social Sciences D-Lab, University of California, Berkeley, Berkeley, CA, USA. <sup>3</sup>Institute for Social Research, University of Michigan, Ann Arbor, MI, USA. <sup>4</sup>Department of Sociology, University of Michigan, Ann Arbor, MI, USA. <sup>5</sup>Kaiser Permanente Colorado Institute for Health Research, Aurora, CO, USA. <sup>6</sup>Department of Public Administration and Policy, Rockefeller College of Public Affairs and Policy, University at Albany, State University of New York, Albany, NY, USA. <sup>7</sup>Division of General Internal Medicine, Department of Medicine, University of Colorado School of Medicine, Aurora, CO, USA. \*e-mail: [dharding@berkeley.edu](mailto:dharding@berkeley.edu)

## Supplementary Methods

### Covariate Measures

Covariate measures are derived from the “Pre-sentencing investigation” conducted by Michigan Department of Corrections (MDOC) staff for the judge in each criminal case prior to sentencing for all felony convictions, no matter the sentence later imposed. Data in these reports are collected from criminal records, interviews with convicted individuals and in some cases their family members, police reports, and prior pre-sentencing investigation reports. Where we encountered discrepancies or missing data, we looked at other data records available, such as other MDOC administrative records or arrest records from the Michigan State Police, and considered the most common value. Covariate descriptive statistics are provided in Supplementary Table 1.

*Age at Sentence:* Age in years on the sentence date, calculated based on the birth date and sentence date. (See discussion of risk periods above for how we handled age at the time when outcomes are measured)

*Non-White (vs. White):* Whether the individual was identified as Black or African-American or some other race other than white. There were too few individuals who were identified as neither Black nor White to sustain a separate category.

*Female:* Whether the individual was identified as female or male.

*Education:* The individual’s highest level of education at the time of sentencing. Categories include Less Than High School, GED, High School, and More Than High School.

*Pre-Sentence Employment:* Whether the individual had any record of employment in the formal labor market in data from the Unemployment Insurance system in the 23 calendar quarters before the sentence.

*Not Single (vs. Single):* Marital status at the time of sentence.

*Pre-sentence Substance Use:* Self or family reported history of substance abuse, including a set of non-mutually exclusive dummy variables indicating Ever Used Alcohol, Ever Used Marijuana, Ever Used Stimulants, Ever Used Opioids, Ever Used Other Drugs.

*Mental Health Illness History:* An indicator for whether there was any history of mental illness prior to sentencing, based on prior records, self-reports, and family reports. Reports of prescription drugs or mental health treatment or hospitalization for mental illness were the most common reason mental illness was recorded, but this could also indicate diagnosis of untreated mental health problems or descriptions of symptoms.

*First Felony:* Whether the individual had never been sentenced for a felony before.

*Number of Prior Arrests:* Number of arrests recorded by the Michigan State Police prior to the baseline sentence date, categorized as: 0-4 Prior Arrests, 5-9 Prior Arrests, 10 or more Prior Arrests.

*Year of Sentence:* Calendar year in which the baseline sentence date fell: 2003, 2004, 2005, or 2006.

### Instrumental Variables Assumptions

In general, a valid instrument must meet two conditions.<sup>1</sup> First, it must affect the causal variable of interest or the “treatment” (here, sentence to prison rather than probation). This is often referred to as the “relevance” condition. Second, it can only be correlated with the outcome through the treatment. In other words, the instrument’s effect on the treatment must be the only pathway through which the instrument affects the outcome, and there are no other unobserved variables that create an association between the instrument and the outcome. This second condition is known as the “exclusion restriction.” While the first condition can be examined empirically, the validity of the exclusion restriction must be argued based on theory or knowledge of the institutional rules that generate the instrument.

The relevance condition in this study was based on the idea that judges have considerable discretion in sentencing and that different judges systematically sentenced more or less harshly than others. Although Michigan does have sentencing guidelines, these guidelines are advisory only and leave considerable room for judicial discretion. We examined the relevance condition by calculating how the probability of sentencing to prison varied by judge within county. Supplementary Figure 1 graphed judge variation in the probability of a prison vs. a probation sentence (Supplementary Figure 1A), in prison minimum sentence lengths (Supplementary Figure 1B) and in probation sentence lengths (Supplementary Figure 1C). Each vertical bar in each graph represents one judge, and the height of the bar is the deviation of that judge's mean sentence from the mean sentence of the other judges in his or her county, after controlling for characteristics of the individual being sentenced (that is, their sentencing practices relative to other judges in their county). The variation across judges within counties in sentencing is readily apparent in all three graphs in Supplementary Figure 1.

Even when there is variation in the treatment across instruments, estimates from an instrumental variables design can be inconsistent when the instruments are weak, in other words, when they are only slightly correlated with treatment.<sup>2</sup> The danger is that chance relationships in a sample could have been mistaken for true correlations in the population, and instrumental variables (IV) estimates may be no better than a regression model that simply adjusts for observed covariates via Ordinary Least Squares.<sup>1</sup> This can be a problem especially when there are many instruments relative to endogenous treatment variables, as is the case here. As suggested by Bollen, we examined Shea's partial R-squared, the proportion of the variation in each treatment variable independently explained by the instruments, that is, once associations with the covariates were partialled out.<sup>3,4</sup> Supplementary Table 2 shows Shea's partial R-squared values for the treatment in this analysis (prison vs. probation) as well as probation sentence length and prison sentence length, both when only judge identifiers are used as instruments and when judge identifiers and their interactions were used as instruments. (The latter set of instruments was used in all analyses presented in this paper.) These values show that the first stage explained a substantial portion of the variation in treatment across all treatments and all subgroups, giving us confidence that the instruments were sufficiently strong.

The traditional test for weak instruments is to estimate the "first-stage" equation and perform an F-test for the joint significance of the instruments (here, the judge identifiers and their interactions with the covariates). F-statistics above 10 are typically considered ideal, but lower F-statistics are not always indicative of a problem; they merely alert the researcher of the potential for a problem.<sup>1,5</sup> Moreover, in the context of a study in which there are many instruments and a large sample size (as was the case here), F-statistics may not be particularly informative regarding instrument strength because the number of instruments and the sample size are included directly in the calculation of the F-statistic. This is evident in the second panel of Supplementary Table 2, which shows the relevant F-statistics. F-statistics were large for the overall sample for the prison, linear prison length, and linear probation length treatments when we used only the judge identifiers as instruments. However, even though we see large values of Shea's partial R-squared, both reductions in sample size as the sample is stratified and increases in the number of instruments from judges only to judges and covariate interactions reduced the F-statistics considerably.

An additional concern with regard to the first-stage is "over fitting," a finite sample bias that leads to the mis-estimation of the first stage when there are many instruments that are weak individually even if they collectively explain a substantial portion of the variation in treatment. To assess whether the number of instruments we used has resulted in biased coefficients, we re-estimated our models in a number of ways that use far fewer instruments. These included (a) using only the judge dummy variables as instruments; (b) constructing a single instrument that is a judge harshness score based on individual judge coefficients from a

linear probability model of prison vs. probation for all cases and conditioning on pre-sentence characteristics and county identifiers, and (c) another variant of a judge harshness score approach that involves estimating what Wooldridge calls a Probit-2SLS model. In this model, predicted probabilities from a probit model of whether an individual received a prison sentence was used as the instrument in a 2SLS model<sup>6</sup>. Prison vs. probation effect coefficients estimated from all of these models were very similar to our main results and led to the same substantive conclusions. (We also verified that our results were not sensitive to the use of linear probability models for the second stage equations by re-estimating our main models using probit models for the second stage equation and then calculating marginal effects).

The exclusion restriction has two requirements, (1) that the instruments are as good as randomly assigned, and (2) that the instruments are correlated with the outcome only through the treatment. We were confident that judges were randomly assigned in Michigan. Criminal cases were assigned to judges when cases are initially filed (at indictment), which means that initial charges were filed before the prosecutor knows which judge will be assigned. Michigan's Administrative Rules of Court specified in section 8.111(B) that judges be assigned to all cases "by lot," but the chief judge of each court is responsible for issuing orders on the exact procedures. Felony cases in Michigan were handled by Circuit Courts, and all Circuit Courts had a computerized case management system that assigned cases at filing to judges using a random number generator. This procedure assigned cases at random based on the proportion of cases a judge is supposed to receive over the course of a year, rather than when the case was filed. Our conversations with both prosecutors and defense attorneys indicated that random assignment of judges was taken extremely seriously as a core tenant of fair and just operations of the court. While experienced attorneys, both prosecutors and defense attorneys, were typically aware of the sentencing styles of particular judges, and one might imagine that some degree of "judge shopping" occurred for high profile or extremely serious cases, circumventing the computerized random number generator appeared implausible on its face, and moreover it would be hard to believe that such efforts, if even possible, would have been taken in the more routine cases that made up the vast majority of felony cases. As discussed above, counties differed on institutional and contextual factors (e.g., prosecutor practices, plea bargaining, unemployment rates) and outcomes and individual characteristics varied systematically across counties, so we removed all between-county variation using county fixed effects. This also ensured that we used only variation in sentencing practices across judges within each county.

While it is impossible to empirically verify that judge assignment is random with respect to unobserved variables, we did check that the covariates we did observe are uncorrelated with judge assignment. Supplementary Table 3 shows that this was indeed the case. The F-tests of the joint significance of the instruments in predicting the covariates net of county fixed effects in Panel A were statistically significant due to our very large sample size (picking up chance variation in characteristics of convicted individuals across judges), but the differences were small in magnitude and had small F-statistics, given the size of the sample. The F statistics also shrank when we stratified by baseline violent offense. Panel B shows covariate means by whether the judge was above or below the median on a judge harshness score. The judge harshness scores are the coefficients on judge dummies in an OLS regression predicting prison vs. probation sentence and controlling for county dummies. Covariate means were well balanced across harsh and lenient judges. Differences in means were largest for race (non-white vs. white). We examined this covariate further to make sure that there were no systematic problems with regard to race. We did so by looking at specific counties, particularly Michigan's largest counties where most non-whites are concentrated. This revealed that the direction of the imbalance differed considerably across counties, which we interpret as evidence that there were no systematic problems with randomization with regard to race. For example, non-whites were more likely than whites to be assigned to judges below the median on the harshness score in Wayne, Berrien, and Lenawee

counties while they were more likely to be assigned to judges above the median harshness score in Macomb, Washtenaw, and Genesee counties. Nonetheless, we controlled for these covariates in all models to adjust for chance differences across judges in individual pre-sentence characteristics.

The exclusion restriction also required us to assume that the instruments were correlated with the outcome only through the treatment (the sentence imposed). For this analysis, this meant that the judge to whom one was assigned only affected future violent crime through the sentence the judge imposed. This assumption would have been violated, for example, if judges who sentenced more harshly also treated defendants more harshly in court, leading them to question the legitimacy of the criminal justice system, which might have made them more likely to engage in future violent crime. However, this would only have been a violation of the assumption if the legitimacy of the system was undermined by the judge's actions beyond the sentence that was imposed. Given the very small amount of time that a given defendant actually interacted with the judge, such effects seemed unlikely to have been consequential. The sheer volume of cases that judges handled was the most direct evidence of the small amount of time a typical criminal defendant spent in the presence of the judge. Data provided by the Michigan State Court Administrative Office showed that Michigan circuit courts handled over 80,000 criminal cases in various stages of court processing per year between 2003 and 2006, or over 500 cases per judge per year on average.<sup>7</sup> One might also hypothesize that this short period of time with the judge would have itself impacted a defendant's view of the legitimacy of the criminal justice system, but this would only effect our analysis if this effect were different between those sentenced to probation and those sentenced to prison and this effect differed across judges.

A violation of the exclusion restriction might also have occurred if prosecutors reacted to the selection of a more or less punitive judge by changing the crimes for which they pursued prosecution or by changing their plea bargaining behavior. For example, a prosecutor on a case that was assigned to a more punitive judge might have been content with a plea to a lesser crime, knowing that the harsh judge would have sentenced at the higher end of the range provided in the sentencing guidelines. Assuming that the prosecutor was basing such decisions on her prediction about the defendant's likelihood of future violence, this scenario could have resulted in defendants who otherwise appeared comparable but who had different probabilities of the outcome having received different sentences as a result of the judge that was assigned.

A similar violation of the exclusion restriction might also have occurred due to the selection of cases into our dataset, which only included cases that resulted in conviction and sentencing. We did not observe defendants who were indicted but not convicted. National data from the 75 largest counties in the U.S. in 2009 suggest that this could be a common occurrence. Within 1 year of a felony arrest, only 54% of the cases had been resolved through a felony conviction, and an additional 12% of cases had been resolved through a misdemeanor conviction. About 75% of the cases not resolved through conviction were dismissed.<sup>8</sup>

While many individuals whose cases did not result in conviction were unlikely to be comparable to those who were convicted (based on actual guilt, for example), defendant plea bargaining could have been influenced by the harshness of the judge to whom the case was assigned. For example, a defendant who drew a harsh judge may have been more willing to plea bargain knowing that a conviction at trial would have resulted in an even more severe sentence, while an otherwise similar defendant who drew a lenient judge may have been more willing to risk a trial knowing there was some chance of acquittal and, in the event of a guilty verdict, a less severe sentence. One might also have suspected that a judge's sentencing practices would have been positively correlated with probability of conviction at trial. Under these scenarios, defendants who appeared before lenient judges would have been less likely to appear in the data, since more would have gone to trial and some of those

would have been acquitted. The result could have been that, among the cases in our dataset, more lenient judges sentenced the cases of individuals who were more likely to engage in violent crime, a correlation between judge harshness and the outcome that was not due to sentence type. This would have introduced a downward bias into the effect of imprisonment. One way to examine whether these scenarios occur was to see if more lenient judges had more trials and fewer plea bargains among the cases that appeared in our data. Fortunately, this was not the case and, as a result, we did not believe that this problem represented a serious threat to our strategy.

Finally, we note an assumption that applies to almost all causal analyses, the “Stable Unit Treatment Value Assumption” (SUTVA). This means that the treatment effect for one individual does not depend on the treatments received by others. This is sometimes referred to more intuitively as “no interference between units.” While this assumption cannot be tested, we see no strong argument for its violation. None of the theories discussed in the main text that explain why prison might affect violence compared to probation seem to turn on the sentences imposed on others unless there are radical changes in the number of people sent to prison, which would change the nature of the prison treatment itself. Our analysis estimates imprisonment effects among individuals on the margin between prison and probation (see the discussion of LATE immediately below), so it does not depend on large variation in the probability of treatment assignment.

### Local Average Treatment Effects

It is reasonable to assume that the effects of prison vs. probation varied across individuals (termed “heterogeneous treatment effects” in the literature).<sup>9</sup> When treatment effects are heterogeneous, instrumental variables methods estimate the “Local Average Treatment Effect” (LATE), which means that the estimated effects apply not to the entire population of those actually treated but rather to those whose treatment status was changed by the instrument. Here, this means we were estimating the effects of prison on those whose sentence was influenced by the judge to whom they were assigned. Some individuals, based on their crimes and their criminal histories, would have been sentenced to prison by all judges and some to probation by all judges. Our estimates captured the effect of prison among those on the margin, who were sentenced to prison because they got a more punitive judge rather than a more lenient judge. By definition, it is not possible to identify these individuals in the data, but we discuss this to be clear about what parameter we estimated. We first note that because the defendants informing the LATE estimate have some probability of receiving another sentence, our estimates are most likely applicable to individuals sentenced to prison on relatively short prison sentences (2-3 years in Michigan). Individuals who would be sentenced to prison by all judges, and are therefore not on the margin our LATE estimates, are those who committed more serious crimes and/or have longer criminal histories and therefore typically receive longer prison sentences.

In studies where there are more instruments than treatment variables – as was the case in our analysis, where we have multiple judge instruments – the LATE interpretation of the treatment effect is a weighted average of the effects that would be produced by using each instrument individually. Angrist and Pischke show that the weights are the relative strength of the effects of the judges on the treatment (in other words, the strength of the “first-stage” for each instrument).<sup>1</sup> This means that, although one cannot determine specifically which judges are driving the identification of effects in the natural experiment, the relative importance of a judge to the identification strategy is the degree to which he or she is different from other judges in the same county in terms of probability of sentencing to prison rather than probation. Supplementary Figure 1 shows that there is considerable variation across many judges in these probabilities. This indicates that the variation in treatment that our study uses to identify the effect of imprisonment is not driven by a small number of judges in the state. In other words, the local average treatment effect estimated in our study is estimated from variation in sentencing across a large number of judges in many counties, rather than specific to a small number of judges in

particular counties. If that were the case, Supplementary Figure 1 would look quite different. Because each bar represents one judge, if a small number of judges were driving the variation between prison and probation, we would see many bars very close to zero and a small number of bars with very large positive or negative values on either end. In contrast, Supplementary Figure 1 shows there is within-county variation in sentencing across many judges.

Another way to provide greater intuition on sentencing variation across judges is to examine the absolute probabilities of sentencing to prison vs. probation (whereas Supplementary Figure 1 shows probabilities relative to other judges in the county). We compared these sentencing probabilities among lenient judges (those with negative relative probabilities in Supplementary Figure 1A) to harsher judges (those with positive relative probabilities in Supplementary Figure 1A). The mean probability of a prison sentence vs. a probation sentence is 0.37 among lenient judges (median = 0.3) and the mean among harsh judges is 0.51 (median = 0.43). This indicates that sentencing variation across judges is concentrated near the middle of the range of probabilities of sentence to prison vs. probation. In addition, the overall probability of sentence to prison vs. probation across all defendants in the analysis is 0.31. This suggests that the LATE estimate is capturing effects for defendants who are slightly more likely to go to prison than the typical defendant. It is also informative to examine the range of probabilities for harsh and lenient judges. The interquartile range for judges who are more lenient than others in their county is 0.12-0.58, while the interquartile range for judges who are harsher than others in their county is 0.04-0.69. The fact that these ranges overlap is further evidence that a wide range of judges is informing the LATE estimate derived from comparing relatively harsh to relatively lenient judges. This is because leniency and harshness are defined relative to county-specific norms and there is also considerable variation in county means in sentencing to prison.

The LATE interpretation of IV requires an additional assumption, which is termed “monotonicity.” This means that the instrument only affects the treatment in one direction – the harshness of judges always affected the treatment in the same direction. In other words, a judge who imposed more punitive sentences than her colleagues on some individuals did not also impose more lenient sentences than her colleagues on others. (This is also sometimes referred to as “no defiers” in the IV literature). This might have occurred if a judge treated some types of individuals, say drug offenders, more harshly than her colleagues, but other types of individuals, such as property offenders, less harshly than her colleagues. Following Mueller-Smith (unpublished manuscript, 2015), we relaxed this assumption by interacting judge dummies with pre-sentencing characteristics and also treating those interactions as instruments.

### Mortality

Of our 111,110 subjects, 3,515 died within 5 years of their initial sentence (3.2%). The death rate was lower among prisoners (2.2%) than probationers (3.2%) when the five-year follow-up was measured from sentence, but higher among prisoners when prisoners were measured from release (5.0%), reflecting higher death rates in the community than in-prison. Because differences in death rates were small and because we considered any effects of imprisonment on risk of death to be part of the effect of imprisonment on violence, we did not adjust our estimates for mortality.

### Missing Data

Because the study used administrative data, there was very little missing data and no sample attrition. Missing covariates were imputed using a hotdeck procedure using race and gender. The only variable with substantial missing data was education (14%). Race was missing for 0.2%, and marital status was missing for

0.3%. Whether or not an arrest was for a violent crime was missing for 11 cases (2 individuals sentenced to prison and 1 sentenced to probation). These 11 cases were excluded from arrest analyses.

### Supplementary References

1. Angrist, J. D. & Pischke, J.-S. *Mostly Harmless Econometrics: An Empiricist's Companion*. (Princeton University Press, 2009).
2. Bound, J., Jaeger, D. A. & Baker, R. M. Problems with Instrumental Variables Estimation When the Correlation Between the Instruments and the Endogeneous Explanatory Variable is Weak. *J. Am. Stat. Assoc.* **90**, 443–450 (1995).
3. Shea, J. Instrument Relevance in Multivariate Linear Models: A Simple Measure. *Rev. Econ. Stat.* **79**, 348–352 (1997).
4. Bollen, K. A. Instrumental Variables in Sociology and the Social Sciences. *Annu. Rev. Sociol.* **38**, 37–72 (2012).
5. Staiger, D. & Stock, J. H. Instrumental Variables Regression with Weak Instruments. *Econometrica* **65**, 557–586 (1997).
6. Wooldridge, J. M. *Econometric Analysis of Cross Section and Panel Data*. (MIT Press, 2002).
7. Michigan Supreme Court. Statistical Reports, Caseloads Supplements. (2016). Available at: <http://courts.mi.gov/education/stats/Caseload/Pages/statistical-supplements-archive.aspx>. (Accessed: 2nd September 2016)
8. Reaves, B. *Felony Defendants in Large Urban Counties, 2009*. (Bureau of Justice Statistics, 2013).
9. Harris, K. M. & Remler, D. K. Who is the marginal patient? Understanding instrumental variables estimates of treatment effects. *Health Serv. Res.* **33**, 1337–60 (1998).



## Supplementary Figures

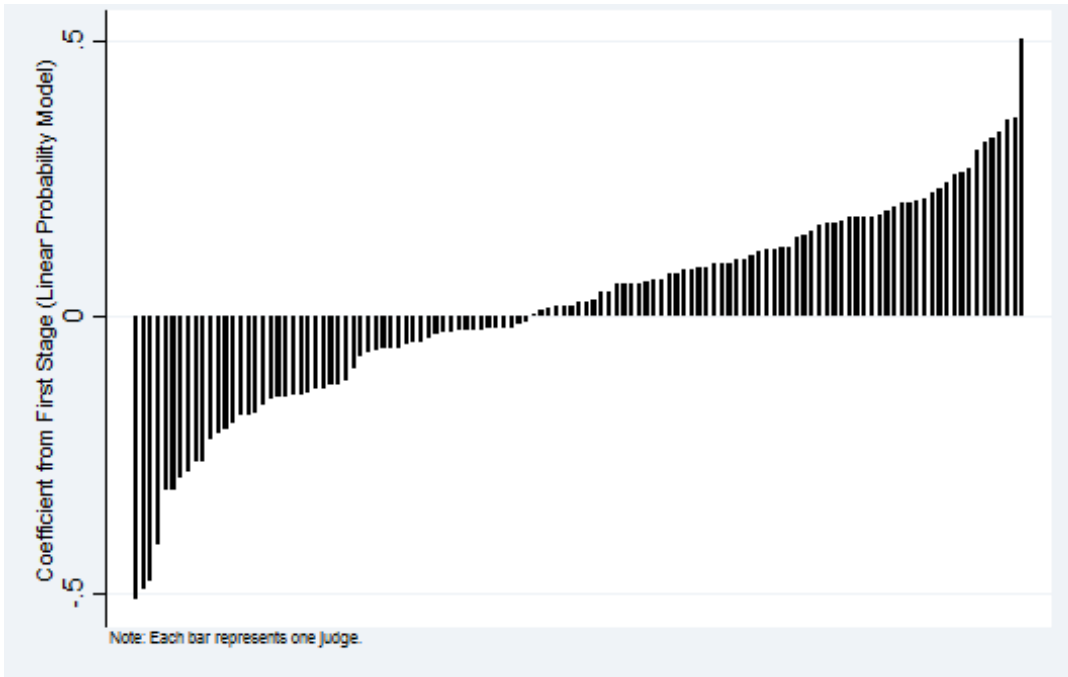

A: Prison vs. Probation

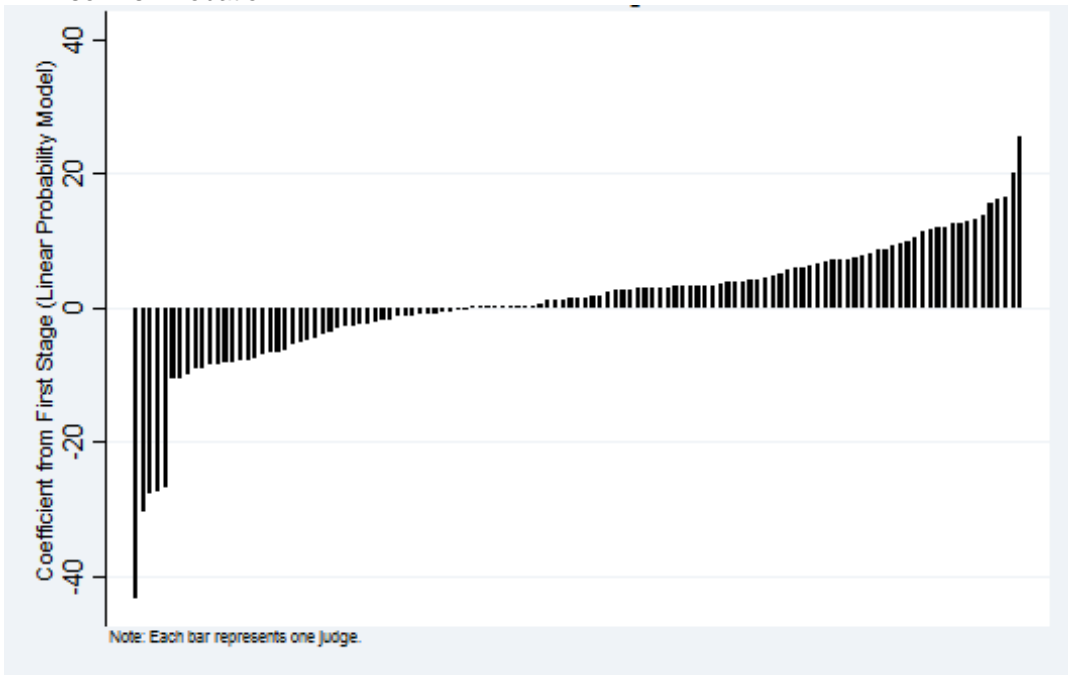

B: Prison Sentence Length

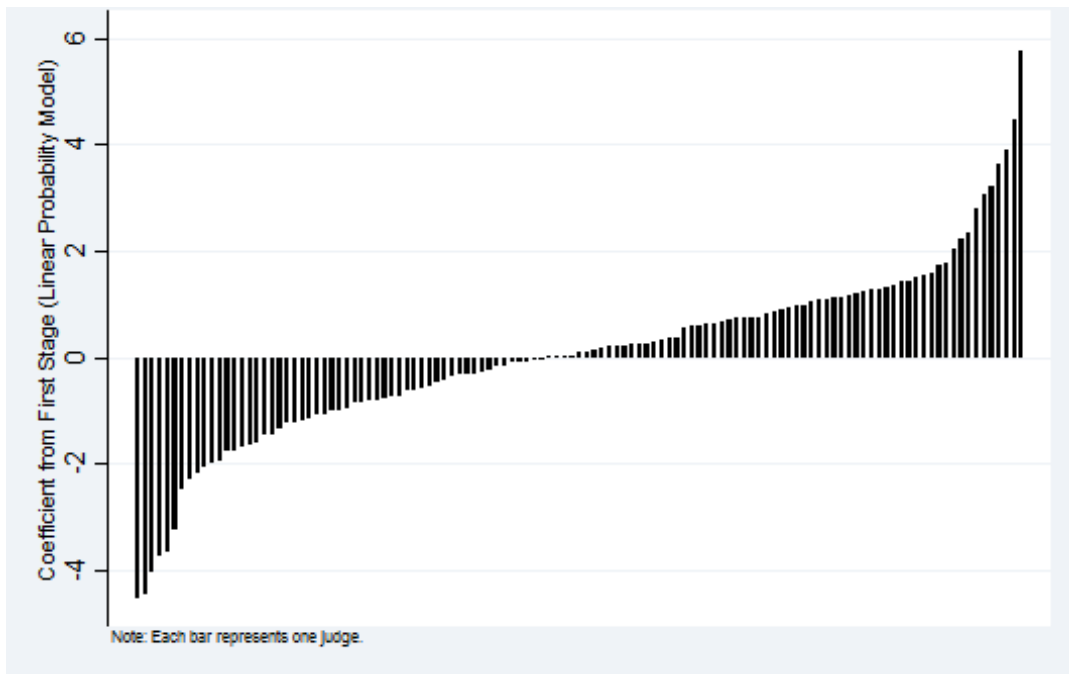

C: Probation Sentence Length

**Supplementary Figure 1. Variation across Judges in Sentencing Practices**

Each bar represents the deviation of a judge’s sentencing practices from that of the mean judge in his or her county. Sentencing practices are defined by probability of sentence to prison rather than probation (Panel A), prison sentence length in months (Panel B), or probation sentence length in months (Panel C). Estimates in each panel come from a single ordinary least squares regression model predicting a case’s sentencing outcome estimated on all cases for which the outcome is defined (A: n=63,585; B: n=19,979; C: n=43,606). Predictors include covariates listed in Supplementary Table 1, county indicators, year indicators, and judge indicators. The bar heights are the coefficients on the judge indicators.

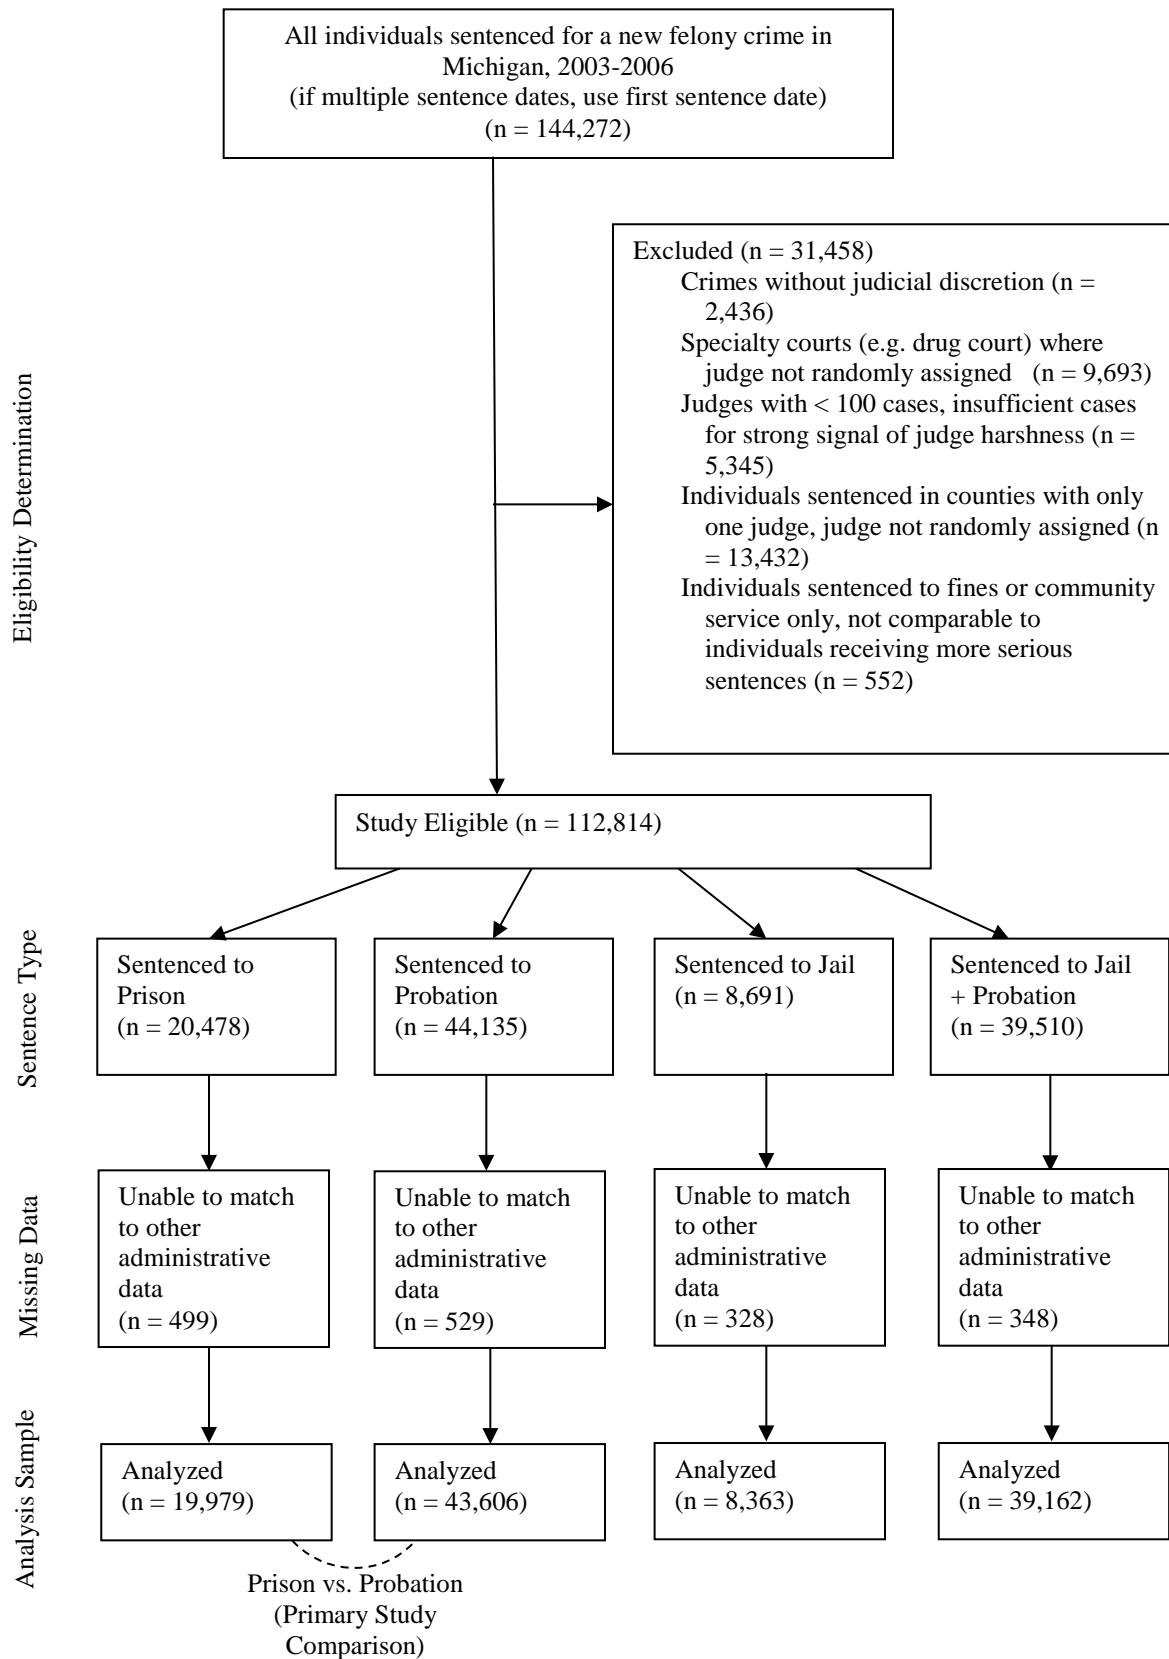

**Supplementary Figure 2: Sample Selection Flowchart**

## Supplementary Tables

**Supplementary Table 1.** Pre-sentence characteristics of people with a felony sentence in the State of Michigan between 2003 and 2006

| Pre-sentence characteristic            | Entire Sample |       | Prison Sentence |       | Probation Sentence |       |
|----------------------------------------|---------------|-------|-----------------|-------|--------------------|-------|
|                                        | mean          | sd    | mean            | sd    | mean               | sd    |
| <u>Demographics</u>                    |               |       |                 |       |                    |       |
| Non-White                              | 0.43          | 0.49  | 0.49            | 0.50  | 0.48               | 0.50  |
| Age                                    | 31.89         | 11.07 | 33.75           | 10.51 | 30.57              | 11.16 |
| Not Single                             | 0.14          | 0.35  | 0.14            | 0.34  | 0.14               | 0.35  |
| Female                                 | 0.18          | 0.38  | 0.07            | 0.25  | 0.23               | 0.42  |
| Employed                               | 0.37          | 0.32  | 0.30            | 0.28  | 0.39               | 0.33  |
| <u>Education</u>                       |               |       |                 |       |                    |       |
| Less Than High School                  | 0.41          | 0.49  | 0.41            | 0.49  | 0.41               | 0.49  |
| GED                                    | 0.14          | 0.35  | 0.23            | 0.42  | 0.10               | 0.30  |
| High School                            | 0.36          | 0.48  | 0.29            | 0.45  | 0.38               | 0.49  |
| More Than High School                  | 0.10          | 0.29  | 0.07            | 0.26  | 0.11               | 0.31  |
| <u>Substance Use and Mental Health</u> |               |       |                 |       |                    |       |
| Ever Used Alcohol                      | 0.68          | 0.47  | 0.66            | 0.47  | 0.63               | 0.48  |
| Ever Used Marijuana                    | 0.62          | 0.49  | 0.62            | 0.49  | 0.61               | 0.49  |
| Ever Used Stimulants                   | 0.33          | 0.47  | 0.41            | 0.49  | 0.27               | 0.45  |
| Ever Used Opioids                      | 0.11          | 0.32  | 0.14            | 0.34  | 0.09               | 0.29  |
| Ever Used Other Drugs                  | 0.24          | 0.43  | 0.27            | 0.44  | 0.25               | 0.44  |
| Mental Health History                  | 0.19          | 0.39  | 0.19            | 0.39  | 0.18               | 0.38  |
| <u>Criminal History</u>                |               |       |                 |       |                    |       |
| First Time Felony Conviction           | 0.59          | 0.49  | 0.33            | 0.47  | 0.74               | 0.44  |
| 0-4 Prior Arrests                      | 0.04          | 0.20  | 0.02            | 0.13  | 0.07               | 0.26  |
| 5-9 Prior Arrests                      | 0.24          | 0.43  | 0.10            | 0.30  | 0.33               | 0.47  |
| 10+ Prior Arrests                      | 0.19          | 0.39  | 0.12            | 0.33  | 0.22               | 0.42  |
| <u>Baseline Sentence Year</u>          |               |       |                 |       |                    |       |
| 2003                                   | 0.26          | 0.44  | 0.29            | 0.45  | 0.24               | 0.43  |
| 2004                                   | 0.25          | 0.44  | 0.25            | 0.44  | 0.25               | 0.43  |
| 2005                                   | 0.24          | 0.43  | 0.23            | 0.42  | 0.25               | 0.43  |
| 2006                                   | 0.24          | 0.43  | 0.22            | 0.42  | 0.26               | 0.44  |
| Sample size                            | 111,110       |       | 19,979          |       | 43,606             |       |

Entire Sample column includes individuals sentenced to Prison, Probation, Jail, and Jail followed by Probation

**Supplementary Table 2.** First Stage Diagnostics

|                                    | Entire Sample<br>(n=111,110) |                                | No Baseline Violent<br>Offense<br>(n = 79,337) |                                | Baseline Violent<br>Offense<br>(n = 31,762) |                                |
|------------------------------------|------------------------------|--------------------------------|------------------------------------------------|--------------------------------|---------------------------------------------|--------------------------------|
|                                    | (A)<br>Judge<br>Only         | (B)<br>Judge &<br>Interactions | (A)<br>Judge<br>Only                           | (B)<br>Judge &<br>Interactions | (A)<br>Judge<br>Only                        | (B)<br>Judge &<br>Interactions |
| <b>A: Shea's Partial R-Squared</b> |                              |                                |                                                |                                |                                             |                                |
| Prison                             | 0.012                        | 0.066                          | 0.013                                          | 0.086                          | 0.014                                       | 0.113                          |
| Prison Length                      | 0.004                        | 0.038                          | 0.008                                          | 0.055                          | 0.005                                       | 0.090                          |
| Prison Length Squared              | 0.002                        | 0.029                          | 0.003                                          | 0.034                          | 0.005                                       | 0.085                          |
| Probation Length                   | 0.018                        | 0.066                          | 0.022                                          | 0.086                          | 0.011                                       | 0.097                          |
| Probation Length Squared           | 0.003                        | 0.026                          | 0.005                                          | 0.041                          | 0.004                                       | 0.074                          |
| <b>B: Partial F-Test</b>           |                              |                                |                                                |                                |                                             |                                |
| Prison                             | 34.548                       | 4.246                          | 14.610                                         | 3.465                          | 13.305                                      | 1.858                          |
| Prison Length                      | 13.994                       | 2.511                          | 4.252                                          | 1.588                          | 4.837                                       | 1.403                          |
| Prison Length Squared              | 5.025                        | 1.715                          | 1.732                                          | 0.993                          | 2.131                                       | 1.190                          |
| Probation Length                   | 29.533                       | 4.122                          | 21.860                                         | 3.637                          | 5.976                                       | 1.475                          |
| Probation Length Squared           | 4.844                        | 1.440                          | 4.310                                          | 1.558                          | 1.651                                       | 1.054                          |
| Sample size                        | 111,110                      |                                | 79,341                                         |                                | 31,769                                      |                                |

In Column A, the instruments include only the judge indicators. In Column B, the instruments include the judge indicators and their interactions with covariates in Supplementary Table 1. Shea's partial R-squared is the proportion of the variation in each treatment variable independently explained by the instruments, that is, once associations with the covariates are partialled out. Shea's partial R-squared is calculated as the partial R-squared for the judge indicator variables as a group (Column A) or the judge indicators and their interactions with the covariates in Supplementary Table 1 as a group (Column B) in an ordinary least squares model predicting the treatment variable with the instruments, county indicators, year indicators, and the covariates. The Partial F-tests are the F-test statistic for the groups of instruments in the same models.

**Supplementary Table 3. Randomization Checks**

| <i>Panel A. F-tests</i> | <b>Entire Sample<br/>(n=111,110)</b> |                | <b>No Baseline Violent<br/>Offense<br/>(n = 79,337)</b> |                | <b>Baseline Violent<br/>Offense<br/>(n = 31,762)</b> |                |
|-------------------------|--------------------------------------|----------------|---------------------------------------------------------|----------------|------------------------------------------------------|----------------|
|                         | <b>Partial F-<br/>statistic</b>      | <b>p-value</b> | <b>Partial F-<br/>statistic</b>                         | <b>p-value</b> | <b>Partial F-<br/>statistic</b>                      | <b>p-value</b> |
| Non-White               | 9.34                                 | < 0.001        | 8.84                                                    | < 0.001        | 1.96                                                 | < 0.001        |
| Age                     | 3.03                                 | < 0.001        | 3.73                                                    | < 0.001        | 1.84                                                 | < 0.001        |
| Female                  | 4.36                                 | < 0.001        | 3.96                                                    | < 0.001        | 1.73                                                 | < 0.001        |
| Less Than High School   | 1.87                                 | < 0.001        | 2.31                                                    | < 0.001        | 1.02                                                 | 0.414          |
| GED                     | 1.69                                 | < 0.001        | 1.59                                                    | < 0.001        | 1.37                                                 | 0.004          |
| High School             | 1.60                                 | < 0.001        | 1.54                                                    | < 0.001        | 1.19                                                 | 0.083          |
| More Than High School   | 1.96                                 | < 0.001        | 1.76                                                    | < 0.001        | 1.21                                                 | 0.062          |
| Pre-Sentence            |                                      | < 0.001        |                                                         | < 0.001        |                                                      |                |
| Employment              | 4.09                                 |                | 4.58                                                    |                | 1.58                                                 | < 0.001        |
| Not Single              | 2.07                                 | < 0.001        | 2.54                                                    | < 0.001        | 1.41                                                 | 0.002          |
| Ever Used Alcohol       | 2.59                                 | < 0.001        | 2.32                                                    | < 0.001        | 1.73                                                 | < 0.001        |
| Ever Used Marijuana     | 2.99                                 | < 0.001        | 1.96                                                    | < 0.001        | 1.59                                                 | < 0.001        |
| Ever Used Stimulants    | 2.88                                 | < 0.001        | 2.60                                                    | < 0.001        | 1.37                                                 | 0.004          |
| Ever Used Opioids       | 1.66                                 | < 0.001        | 1.55                                                    | < 0.001        | 1.09                                                 | 0.247          |
| Ever Used Other Drugs   | 3.05                                 | < 0.001        | 2.04                                                    | < 0.001        | 1.37                                                 | 0.005          |
| Mental Health History   | 2.36                                 | < 0.001        | 1.78                                                    | < 0.001        | 1.42                                                 | 0.002          |
| First Felony            | 5.13                                 | < 0.001        | 4.26                                                    | < 0.001        | 2.40                                                 | < 0.001        |
| 0-4 Prior Arrests       | 4.08                                 | < 0.001        | 4.46                                                    | < 0.001        | 0.80                                                 | 0.944          |
| 5-9 Prior Arrests       | 3.49                                 | < 0.001        | 2.73                                                    | < 0.001        | 2.19                                                 | < 0.001        |
| 10+ Prior Arrests       | 1.77                                 | < 0.001        | 1.57                                                    | < 0.001        | 1.13                                                 | 0.159          |

  

| <i>Panel B. Covariate<br/>Means</i> | <b>Judge Harshness<br/>Score Median</b> |              | <b>Judge Harshness<br/>Score Median</b> |              | <b>Judge Harshness<br/>Score Median</b> |              |
|-------------------------------------|-----------------------------------------|--------------|-----------------------------------------|--------------|-----------------------------------------|--------------|
|                                     | <b>Below</b>                            | <b>Above</b> | <b>Below</b>                            | <b>Above</b> | <b>Below</b>                            | <b>Above</b> |
| Non-White                           | 0.46                                    | 0.42         | 0.45                                    | 0.41         | 0.42                                    | 0.44         |
| Age                                 | 31.9                                    | 31.9         | 32.1                                    | 32.1         | 31.3                                    | 31.3         |
| Female                              | 0.19                                    | 0.17         | 0.21                                    | 0.19         | 0.12                                    | 0.11         |
| Less Than High School               | 0.42                                    | 0.40         | 0.40                                    | 0.39         | 0.44                                    | 0.44         |
| GED                                 | 0.13                                    | 0.15         | 0.13                                    | 0.14         | 0.15                                    | 0.15         |
| High School                         | 0.36                                    | 0.35         | 0.37                                    | 0.36         | 0.33                                    | 0.33         |
| More Than High School               | 0.08                                    | 0.10         | 0.09                                    | 0.11         | 0.09                                    | 0.08         |
| Pre-Sentence                        |                                         |              |                                         |              |                                         |              |
| Employment                          | 0.36                                    | 0.37         | 0.37                                    | 0.37         | 0.36                                    | 0.35         |
| Not Single                          | 0.68                                    | 0.66         | 0.68                                    | 0.66         | 0.69                                    | 0.68         |
| Ever Used Alcohol                   | 0.67                                    | 0.68         | 0.67                                    | 0.68         | 0.69                                    | 0.66         |
| Ever Used Marijuana                 | 0.63                                    | 0.62         | 0.64                                    | 0.63         | 0.60                                    | 0.59         |
| Ever Used Stimulants                | 0.33                                    | 0.34         | 0.35                                    | 0.36         | 0.29                                    | 0.28         |
| Ever Used Opioids                   | 0.12                                    | 0.11         | 0.13                                    | 0.12         | 0.10                                    | 0.09         |
| Ever Used Other Drugs               | 0.23                                    | 0.25         | 0.23                                    | 0.24         | 0.25                                    | 0.28         |
| Mental Health History               | 0.18                                    | 0.19         | 0.17                                    | 0.18         | 0.24                                    | 0.21         |
| First Felony                        | 0.61                                    | 0.58         | 0.61                                    | 0.57         | 0.61                                    | 0.59         |
| 0-4 Prior Arrests                   | 0.49                                    | 0.46         | 0.50                                    | 0.47         | 0.44                                    | 0.44         |
| 5-9 Prior Arrests                   | 0.29                                    | 0.29         | 0.28                                    | 0.29         | 0.30                                    | 0.30         |
| 10+ Prior Arrests                   | 0.22                                    | 0.25         | 0.22                                    | 0.24         | 0.25                                    | 0.26         |

Panel A: F-tests are joint significance tests of judge indicators from an ordinary least squares regression model predicting the covariate and controlling for county and year indicators. Panel B: Judge harshness scores are coefficients from judge indicators in a regression predicting prison vs. probation sentences and controlling for county and year indicators. Covariate means are calculated for cases with judges above or below the median judge harshness score.

**Supplementary Table 4.**

**Top 20 Most Common Types of Violent Offenses (baseline offenses), by Sentence Type**

| <b>Prison Sentence</b>                     |       |         | <b>Probation Sentence</b>                  |       |         |
|--------------------------------------------|-------|---------|--------------------------------------------|-------|---------|
| Offense                                    | Freq. | Percent | Offense                                    | Freq. | Percent |
| Robbery, Armed                             | 1,326 | 11.73   | Assault With Dangerous Weapon              | 1,836 | 23.37   |
| Home Invasion - 2 <sup>nd</sup> Degree     | 951   | 8.41    | Assault/Resist/Obstruct Police             | 1,375 | 17.50   |
| Assault/Resist/Obstruct Police             | 795   | 7.03    | Home Invasion - 2 <sup>nd</sup> Degree     | 841   | 10.71   |
| Home Invasion - 1 <sup>st</sup> Degree     | 718   | 6.35    | Home Invasion - 3 <sup>rd</sup> Degree     | 470   | 5.98    |
| Assault Less Murder                        | 676   | 5.98    | Larceny From Person                        | 309   | 3.93    |
| Assault With Dangerous Weapon              | 600   | 5.31    | Home Invasion - 1 <sup>st</sup> Degree     | 266   | 3.39    |
| Robbery, Unarmed                           | 553   | 4.89    | Robbery, Unarmed                           | 248   | 3.16    |
| Murder - 2 <sup>nd</sup> Degree            | 478   | 4.23    | Assault Less Murder                        | 243   | 3.09    |
| CSC - 3 <sup>rd</sup> Degree, Person 13-15 | 475   | 4.20    | Child Abuse 3 <sup>rd</sup> Degree         | 182   | 2.32    |
| CSC - 1 <sup>st</sup> Degree, Person <13   | 434   | 3.84    | CSC - 4 <sup>th</sup> Degree (Force)       | 178   | 2.27    |
| CSC - 2 <sup>nd</sup> Degree, Person <13   | 413   | 3.65    | Domestic Violence - 3 <sup>rd</sup> Degree | 143   | 1.82    |
| CSC - 3 <sup>rd</sup> Degree               | 285   | 2.52    | CSC - 3 <sup>rd</sup> Degree, Person 13-15 | 141   | 1.8     |
| Assault With Intent To Murder              | 274   | 2.42    | Aggravated Stalking                        | 139   | 1.77    |
| Larceny From Person                        | 236   | 2.09    | Negligent Homicide                         | 126   | 1.60    |
| Assault to Rob Armed                       | 210   | 1.86    | CSC - 4 <sup>th</sup> Degree, Person 13-16 | 108   | 1.37    |
| Assault With Intent, Sex                   | 159   | 1.41    | Child Abuse - 2 <sup>nd</sup> Degree       | 105   | 1.34    |
| Car Jacking                                | 150   | 1.33    | CSC - 2 <sup>nd</sup> Degree, Person <13   | 89    | 1.13    |
| Robbery, Bank                              | 139   | 1.23    | CSC - 4 <sup>th</sup> Degree               | 82    | 1.04    |
| Home Invasion - 3 <sup>rd</sup> Degree     | 138   | 1.22    | Arson Personal Property                    | 61    | 0.78    |
| CSC - 1 <sup>st</sup> Degree               | 119   | 1.05    | Children-Accosting                         | 55    | 0.7     |

CSC = Criminal Sexual Conduct



**Supplementary Table 5.** Ordinary Least Squares Regression Estimates of Effects of Prison vs. Probation Sentence on Violent Crime, by risk period, crime measure, and time since sentence or release

|                                               | <b>Entire Sample</b>                              |                                                   | <b>No Baseline Violent Offense</b>                |                                                  | <b>Baseline Violent Offense</b>                   |                                                  |
|-----------------------------------------------|---------------------------------------------------|---------------------------------------------------|---------------------------------------------------|--------------------------------------------------|---------------------------------------------------|--------------------------------------------------|
| <b>A. Time Since Sentence</b>                 |                                                   |                                                   |                                                   |                                                  |                                                   |                                                  |
| <b><u>Ever Arrested for Violent Crime</u></b> |                                                   |                                                   |                                                   |                                                  |                                                   |                                                  |
| 1 Year                                        | -0.068<br>-41.072<br>(-0.071 , -0.065)<br>p<0.001 | F(67) = 76.28<br>p<0.001<br>N=111,099<br>R2=0.032 | -0.061<br>-29.965<br>(-0.065 , -0.057)<br>p<0.001 | F(67) = 48.22<br>p<0.001<br>N=79,337<br>R2=0.030 | -0.087<br>-24.229<br>(-0.094 , -0.080)<br>p<0.001 | F(67) = 25.48<br>p<0.001<br>N=31,762<br>R2=0.047 |
| 3 Years                                       | -0.113<br>-37.336<br>(-0.118 , -0.107)<br>p<0.001 | F(67) = 167.4<br>p<0.001<br>N=111,099<br>R2=0.070 | -0.092<br>-23.139<br>(-0.099 , -0.084)<br>p<0.001 | F(67) = 86.21<br>p<0.001<br>N=79,337<br>R2=0.066 | -0.164<br>-29.483<br>(-0.175 , -0.153)<br>p<0.001 | F(67) = 71.74<br>p<0.001<br>N=31,762<br>R2=0.098 |
| 5 Years                                       | -0.105<br>-27.699<br>(-0.112 , -0.097)<br>p<0.001 | F(67) = 216.4<br>p<0.001<br>N=111,099<br>R2=0.089 | -0.074<br>-14.816<br>(-0.084 , -0.064)<br>p<0.001 | F(67) = 120.3<br>p<0.001<br>N=79,337<br>R2=0.085 | -0.177<br>-26.396<br>(-0.190 , -0.164)<br>p<0.001 | F(67) = 101<br>p<0.001<br>N=31,762<br>R2=0.119   |
| <b><u>Ever Convicted of Violent Crime</u></b> |                                                   |                                                   |                                                   |                                                  |                                                   |                                                  |
| 1 Year                                        | -0.015<br>-18.709<br>(-0.016 , -0.013)<br>p<0.001 | F(67) = 17.52<br>p<0.001<br>N=111,110<br>R2=0.009 | -0.012<br>-12.650<br>(-0.014 , -0.010)<br>p<0.001 | F(67) = 10.77<br>p<0.001<br>N=79,341<br>R2=0.009 | -0.023<br>-12.379<br>(-0.027 , -0.019)<br>p<0.001 | F(67) = 6.061<br>p<0.001<br>N=31,769<br>R2=0.014 |
| 3 Years                                       | -0.035<br>-18.239<br>(-0.039 , -0.031)<br>p<0.001 | F(67) = 61.75<br>p<0.001<br>N=111,110<br>R2=0.031 | -0.028<br>-11.472<br>(-0.032 , -0.023)<br>p<0.001 | F(67) = 32.24<br>p<0.001<br>N=79,341<br>R2=0.029 | -0.063<br>-16.532<br>(-0.070 , -0.056)<br>p<0.001 | F(67) = 26.06<br>p<0.001<br>N=31,769<br>R2=0.043 |

|         |                                                   |                                                   |                                                  |                                                  |                                                   |                                                  |
|---------|---------------------------------------------------|---------------------------------------------------|--------------------------------------------------|--------------------------------------------------|---------------------------------------------------|--------------------------------------------------|
| 5 Years | -0.029<br>-11.257<br>(-0.034 , -0.024)<br>p<0.001 | F(67) = 86.51<br>p<0.001<br>N=111,110<br>R2=0.046 | -0.020<br>-5.881<br>(-0.026 , -0.013)<br>p<0.001 | F(67) = 48.84<br>p<0.001<br>N=79,341<br>R2=0.044 | -0.069<br>-14.266<br>(-0.078 , -0.059)<br>p<0.001 | F(67) = 39.25<br>p<0.001<br>N=31,769<br>R2=0.060 |
|---------|---------------------------------------------------|---------------------------------------------------|--------------------------------------------------|--------------------------------------------------|---------------------------------------------------|--------------------------------------------------|

**B. Time Since Release**

**Ever Arrested for Violent Crime**

|         |                                                  |                                                   |                                                  |                                                  |                                                  |                                                  |
|---------|--------------------------------------------------|---------------------------------------------------|--------------------------------------------------|--------------------------------------------------|--------------------------------------------------|--------------------------------------------------|
| 1 Year  | -0.006<br>-2.282<br>(-0.011 , -0.001)<br>p=0.023 | F(67) = 36.60<br>p<0.001<br>N=106,926<br>R2=0.021 | -0.008<br>-2.106<br>(-0.015 , -0.001)<br>p=0.035 | F(67) = 26.38<br>p<0.001<br>N=78,856<br>R2=0.020 | -0.022<br>-4.417<br>(-0.031 , -0.012)<br>p<0.001 | F(67) = 11.75<br>p<0.001<br>N=28,070<br>R2=0.027 |
| 3 Years | -0.003<br>-0.641<br>(-0.011 , 0.005)<br>p=0.521  | F(67) = 88.84<br>p<0.001<br>N=104,605<br>R2=0.049 | -0.003<br>-0.481<br>(-0.014 , 0.009)<br>p=0.631  | F(67) = 64.47<br>p<0.001<br>N=78,425<br>R2=0.048 | -0.029<br>-3.884<br>(-0.044 , -0.014)<br>p<0.001 | F(67) = 25.85<br>p<0.001<br>N=26,180<br>R2=0.057 |
| 5 Years | 0.012<br>2.122<br>(0.001 , 0.022)<br>p=0.034     | F(67) = 122.3<br>p<0.001<br>N=100,445<br>R2=0.065 | 0.016<br>2.030<br>(0.001 , 0.032)<br>p=0.042     | F(67) = 87.54<br>p<0.001<br>N=76,748<br>R2=0.063 | -0.021<br>-2.173<br>(-0.041 , -0.002)<br>p=0.030 | F(67) = 33.14<br>p<0.001<br>N=23,697<br>R2=0.075 |

**Ever Convicted of Violent Crime**

|         |                                              |                                                   |                                               |                                                  |                                                 |                                                  |
|---------|----------------------------------------------|---------------------------------------------------|-----------------------------------------------|--------------------------------------------------|-------------------------------------------------|--------------------------------------------------|
| 1 Year  | 0.005<br>3.525<br>(0.002 , 0.008)<br>p<0.001 | F(67) = 14.45<br>p<0.001<br>N=108,404<br>R2=0.009 | 0.003<br>1.886<br>(-0.000 , 0.007)<br>p=0.059 | F(67) = 9.118<br>p<0.001<br>N=79,094<br>R2=0.008 | 0.000<br>0.049<br>(-0.005 , 0.006)<br>p=0.961   | F(67) = 7.842<br>p<0.001<br>N=29,310<br>R2=0.013 |
| 3 Years | 0.011<br>4.163<br>(0.006 , 0.016)<br>p<0.001 | F(67) = 42.59<br>p<0.001<br>N=107,425<br>R2=0.025 | 0.007<br>2.045<br>(0.000 , 0.014)<br>p=0.041  | F(67) = 28.20<br>p<0.001<br>N=78,949<br>R2=0.022 | -0.006<br>-1.193<br>(-0.016 , 0.004)<br>p=0.233 | F(67) = 14.89<br>p<0.001<br>N=28,476<br>R2=0.033 |

|         |                 |               |                 |               |                  |               |
|---------|-----------------|---------------|-----------------|---------------|------------------|---------------|
| 5 Years | 0.020           | F(67) = 66.13 | 0.012           | F(67) = 43.87 | -0.001           | F(67) = 22.19 |
|         | 6.244           | p<0.001       | 2.732           | p<0.001       | -0.206           | p<0.001       |
|         | (0.014 , 0.027) | N=105,799     | (0.003 , 0.021) | N=78,667      | (-0.013 , 0.011) | N=27,132      |
|         | p<0.001         | R2=0.038      | p=0.006         | R2=0.034      | p=0.837          | R2=0.049      |

---

Each cell presents estimates from a separate ordinary least squares regression model predicting the measure of ever committing a violent crime with the sentence type, sentence length, and their interactions (see Methods) controlling for covariates in Supplementary Table 1. Left column contains unstandardized beta coefficient representing the effect of Prison vs. Probation sentence at 24 month sentence lengths; t-statistic, 95% confidence interval in parentheses, and p-value from two tailed test. Right column contains model fit statistics: F-test statistics and degrees of freedom in parentheses, p-value from two-tailed test, sample size, and R-squared.

**Supplementary Table 6.** 2SLS Estimates of Effects of Prison vs. Probation Sentence on Alternative Violent Crime Outcomes and Future Imprisonment Outcomes, by risk period, time since sentence or release, and baseline violent offense

| <b>A. Time Since Sentence</b>                                                                                      | <b>Entire Sample</b> |                 | <b>No Baseline Violent Offense</b> |                  | <b>Baseline Violent Offense</b> |                  |
|--------------------------------------------------------------------------------------------------------------------|----------------------|-----------------|------------------------------------|------------------|---------------------------------|------------------|
| <b><u>Number of Arrests</u></b>                                                                                    |                      |                 |                                    |                  |                                 |                  |
| 1 Year                                                                                                             | -0.146               | Chi2(67) = 1133 | -0.111                             | Chi2(67) = 971.8 | -0.161                          | Chi2(67) = 337.7 |
|                                                                                                                    | -5.627               | p<0.001         | -3.980                             | p<0.001          | -5.457                          | p<0.001          |
|                                                                                                                    | (-0.197 , -0.095)    | N=111,099       | (-0.166 , -0.056)                  | N=79,337         | (-0.219 , -0.103)               | N=31,762         |
|                                                                                                                    | p<0.001              | R2=0.015        | p<0.001                            | R2=0.017         | p<0.001                         | R2=0.017         |
| 3 Years                                                                                                            | -0.272               | Chi2(67) = 3166 | -0.189                             | Chi2(67) = 2553  | -0.372                          | Chi2(67) = 777   |
|                                                                                                                    | -5.585               | p<0.001         | -3.388                             | p<0.001          | -6.128                          | p<0.001          |
|                                                                                                                    | (-0.368 , -0.177)    | N=111,099       | (-0.299 , -0.080)                  | N=79,337         | (-0.491 , -0.253)               | N=31,762         |
|                                                                                                                    | p<0.001              | R2=0.042        | p<0.001                            | R2=0.044         | p<0.001                         | R2=0.052         |
| 5 Years                                                                                                            | -0.241               | Chi2(67) = 4998 | -0.143                             | Chi2(67) = 3943  | -0.405                          | Chi2(67) = 1254  |
|                                                                                                                    | -3.777               | p<0.001         | -1.951                             | p<0.001          | -4.745                          | p<0.001          |
|                                                                                                                    | (-0.367 , -0.116)    | N=111,099       | (-0.286 , 0.001)                   | N=79,337         | (-0.572 , -0.238)               | N=31,762         |
|                                                                                                                    | p<0.001              | R2=0.060        | p=0.051                            | R2=0.062         | p<0.001                         | R2=0.070         |
| <b><u>Ever Arrested for Violent Crime (excludes certain weapons possession and nonviolent sexual offenses)</u></b> |                      |                 |                                    |                  |                                 |                  |
| 1 Year                                                                                                             | -0.059               | Chi2(67) = 1522 | -0.041                             | Chi2(67) = 1242  | -0.078                          | Chi2(67) = 473.2 |
|                                                                                                                    | -7.611               | p<0.001         | -4.617                             | p<0.001          | -7.162                          | p<0.001          |
|                                                                                                                    | (-0.075 , -0.044)    | N=111,099       | (-0.058 , -0.023)                  | N=79,337         | (-0.099 , -0.057)               | N=31,762         |
|                                                                                                                    | p<0.001              | R2=0.024        | p<0.001                            | R2=0.022         | p<0.001                         | R2=0.040         |
| 3 Years                                                                                                            | -0.081               | Chi2(67) = 4661 | -0.068                             | Chi2(67) = 3719  | -0.129                          | Chi2(67) = 1268  |
|                                                                                                                    | -6.506               | p<0.001         | -4.592                             | p<0.001          | -7.855                          | p<0.001          |

|         |                                                  |                                                     |                                                 |                                                    |                                                  |                                                    |
|---------|--------------------------------------------------|-----------------------------------------------------|-------------------------------------------------|----------------------------------------------------|--------------------------------------------------|----------------------------------------------------|
|         | (-0.105 , -0.056)<br>p<0.001                     | N=111,099<br>R2=0.054                               | (-0.097 , -0.039)<br>p<0.001                    | N=79,337<br>R2=0.050                               | (-0.161 , -0.097)<br>p<0.001                     | N=31,762<br>R2=0.086                               |
| 5 Years | -0.064<br>-4.347<br>(-0.093 , -0.035)<br>p<0.001 | Chi2(67) = 7620<br>p<0.001<br>N=111,099<br>R2=0.072 | -0.033<br>-1.873<br>(-0.067 , 0.002)<br>p=0.061 | Chi2(67) = 5902<br>p<0.001<br>N=79,337<br>R2=0.066 | -0.152<br>-7.961<br>(-0.190 , -0.115)<br>p<0.001 | Chi2(67) = 2063<br>p<0.001<br>N=31,762<br>R2=0.106 |

**Conviction for Medium or High Severity Violent Crime (Maximum Sentence at least 49 months)**

|         |                                                  |                                                      |                                                  |                                                     |                                                  |                                                     |
|---------|--------------------------------------------------|------------------------------------------------------|--------------------------------------------------|-----------------------------------------------------|--------------------------------------------------|-----------------------------------------------------|
| 1 Year  | -0.007<br>-2.198<br>(-0.013 , -0.001)<br>p=0.028 | Chi2(67) = 536.7<br>p<0.001<br>N=111,110<br>R2=0.000 | -0.001<br>-0.418<br>(-0.008 , 0.005)<br>-0.001   | Chi2(67) = 409.7<br>p<0.001<br>N=79,341<br>R2=0.005 | -0.013<br>-2.764<br>(-0.022 , -0.004)<br>p=0.006 | Chi2(67) = 186.3<br>p<0.001<br>N=31,769<br>R2=0.006 |
| 3 Years | -0.021<br>-3.272<br>(-0.034 , -0.009)<br>p<0.001 | Chi2(67) = 1545<br>p<0.001<br>N=111,110<br>R2=0.015  | -0.017<br>-2.332<br>(-0.031 , -0.003)<br>p=0.013 | Chi2(67) = 1165<br>p<0.001<br>N=79,341<br>R2=0.017  | -0.037<br>-3.899<br>(-0.055 , -0.018)<br>p<0.001 | Chi2(67) = 494.5<br>p<0.001<br>N=31,769<br>R2=0.023 |
| 5 Years | -0.022<br>-2.707<br>(-0.037 , -0.006)<br>p=0.007 | Chi2(67) = 2458<br>p<0.001<br>N=111,110<br>R2=0.026  | -0.010<br>-1.057<br>(-0.028 , 0.008)<br>p=0.291  | Chi2(67) = 1795<br>p<0.001<br>N=79,341<br>R2=0.024  | -0.035<br>-3.083<br>(-0.057 , -0.013)<br>p=0.002 | Chi2(67) = 756.9<br>p<0.001<br>N=31,769<br>R2=0.027 |

**Conviction for Violent Crime Leading to Imprisonment**

|        |        |                  |       |                  |        |                  |
|--------|--------|------------------|-------|------------------|--------|------------------|
| 1 Year | -0.001 | Chi2(67) = 484.2 | 0.003 | Chi2(67) = 350.9 | -0.009 | Chi2(67) = 162.9 |
|--------|--------|------------------|-------|------------------|--------|------------------|

|         |                                                 |                                                     |                                                 |                                                    |                                                  |                                                     |
|---------|-------------------------------------------------|-----------------------------------------------------|-------------------------------------------------|----------------------------------------------------|--------------------------------------------------|-----------------------------------------------------|
|         | -0.208<br>(-0.006 , 0.005)<br>p<0.835           | p<0.001<br>N=111,110<br>R2=0.002                    | 0.730<br>(-0.004 , 0.009)<br>p=0.465            | p<0.001<br>N=79,341<br>R2=0.003                    | -1.930<br>(-0.017 , 0.000)<br>p=0.054            | p<0.001<br>N=31,769<br>R2=0.002                     |
| 3 Years | -0.009<br>-1.318<br>(-0.021 , 0.004)<br>p=0.187 | Chi2(67) = 1586<br>p<0.001<br>N=111,110<br>R2=0.016 | -0.005<br>-0.613<br>(-0.019 , 0.010)<br>p=0.540 | Chi2(67) = 1169<br>p<0.001<br>N=79,341<br>R2=0.015 | -0.020<br>-2.257<br>(-0.038 , -0.003)<br>p=0.024 | Chi2(67) = 454.4<br>p<0.001<br>N=31,769<br>R2=0.016 |
| 5 Years | -0.001<br>-0.157<br>(-0.017 , 0.014)<br>p=0.875 | Chi2(67) = 2677<br>p<0.001<br>N=111,110<br>R2=0.027 | 0.010<br>1.037<br>(-0.009 , 0.028)<br>p=0.300   | Chi2(67) = 1880<br>p<0.001<br>N=79,341<br>R2=0.025 | -0.011<br>-0.969<br>(-0.033 , 0.011)<br>p=0.333  | Chi2(67) = 815.1<br>p<0.001<br>N=31,769<br>R2=0.024 |

**Conviction for Violent Crime (excludes Assault/Resist/Obstruct Police without Injury - MCL 750.81d1)**

|         |                                                  |                                                      |                                                  |                                                     |                                                  |                                                     |
|---------|--------------------------------------------------|------------------------------------------------------|--------------------------------------------------|-----------------------------------------------------|--------------------------------------------------|-----------------------------------------------------|
| 1 Year  | -0.011<br>-2.952<br>(-0.018 , -0.004)<br>p=0.003 | Chi2(67) = 666.8<br>p<0.001<br>N=111,110<br>R2=0.004 | -0.006<br>-1.347<br>(-0.014 , 0.003)<br>p=0.178  | Chi2(67) = 525.5<br>p<0.001<br>N=79,341<br>R2=0.006 | -0.021<br>-3.712<br>(-0.032 , -0.010)<br>p=0.001 | Chi2(67) = 239.2<br>p<0.001<br>N=31,769<br>R2=0.006 |
| 3 Years | -0.038<br>-4.844<br>(-0.053 , -0.022)<br>p<0.001 | Chi2(67) = 1811<br>p<0.001<br>N=111,110<br>R2=0.016  | -0.032<br>-3.714<br>(-0.049 , -0.015)<br>p<0.001 | Chi2(67) = 1429<br>p<0.001<br>N=79,341<br>R2=0.020  | -0.061<br>-5.629<br>(-0.082 , -0.040)<br>p<0.001 | Chi2(67) = 504.9<br>p<0.001<br>N=31,769<br>R2=0.023 |
| 5 Years | -0.034                                           | Chi2(67) = 3044                                      | -0.025                                           | Chi2(67) = 2298                                     | -0.055                                           | Chi2(67) = 821.8                                    |

|                   |           |                   |          |                   |          |
|-------------------|-----------|-------------------|----------|-------------------|----------|
| -3.572            | p<0.001   | -2.381            | p<0.001  | -4.168            | p<0.001  |
| (-0.053 , -0.015) | N=111,110 | (-0.046 , -0.004) | N=79,341 | (-0.082 , -0.029) | N=31,769 |
| p<0.001           | R2=0.029  | p=0.017           | R2=0.031 | p<0.001           | R2=0.027 |

**Imprisonment for Any Reason**

|         |                  |                  |                  |                 |                   |                  |
|---------|------------------|------------------|------------------|-----------------|-------------------|------------------|
| 1 Year  | 0.005            | Chi2(67) = 1470  | -0.000           | Chi2(67) = 1108 | -0.018            | Chi2(67) = 459.2 |
|         | 0.778            | p<0.001          | -0.054           | p<0.001         | -2.343            | p<0.001          |
|         | (-0.008 , 0.018) | N=111,110        | (-0.016 , 0.015) | N=79,341        | (-0.033 , -0.003) | N=31,769         |
|         | p=0.437          | R2=0.011         | p=0.957          | R2=0.015        | p=0.019           | R2=0.025         |
| 3 Years | 0.078            | Chi2(67) = 6634  | 0.081            | Chi2(67) = 5365 | -0.008            | Chi2(67) = 1632  |
|         | 6.083            | p<0.001          | 5.195            | p<0.001         | -0.542            | p<0.001          |
|         | (0.053 , 0.103)  | N=111,110        | (0.051 , 0.112)  | N=79,341        | (-0.039 , 0.022)  | N=31,769         |
|         | p<0.001          | R2=0.058         | p<0.001          | R2=0.071        | p=0.588           | R2=0.078         |
| 5 Years | 0.153            | Chi2(67) = 11708 | 0.157            | Chi2(67) = 9224 | 0.042             | Chi2(67) = 2919  |
|         | 10.395           | p<0.001          | 8.708            | p<0.001         | 2.263             | p<0.001          |
|         | (0.124 , 0.181)  | N=111,110        | (0.122 , 0.192)  | N=79,341        | (0.006 , 0.079)   | N=31,769         |
|         | p<0.001          | R2=0.101         | p<0.001          | R2=0.117        | p=0.024           | R2=0.102         |

**Imprisonment for Technical Violation**

|        |                 |                  |                  |                  |                  |                  |
|--------|-----------------|------------------|------------------|------------------|------------------|------------------|
| 1 Year | 0.013           | Chi2(67) = 991.3 | 0.011            | Chi2(67) = 746.5 | -0.009           | Chi2(67) = 374.3 |
|        | 2.470           | p<0.001          | 1.796            | p<0.001          | -1.427           | p<0.001          |
|        | (0.003 , 0.023) | N=111,110        | (-0.001 , 0.023) | N=79,341         | (-0.021 , 0.003) | N=31,769         |
|        | p=0.013         | R2=0.008         | p=0.072          | R2=0.010         | p=0.154          | R2=0.022         |

|                                               |                                                 |                                                      |                                                  |                                                     |                                                  |                                                     |
|-----------------------------------------------|-------------------------------------------------|------------------------------------------------------|--------------------------------------------------|-----------------------------------------------------|--------------------------------------------------|-----------------------------------------------------|
| 3 Years                                       | 0.088<br>9.189<br>(0.069 , 0.107)<br>p<0.001    | Chi2(67) = 3157<br>p<0.001<br>N=111,110<br>R2=0.033  | 0.090<br>7.672<br>(0.067 , 0.113)<br>p<0.001     | Chi2(67) = 2485<br>p<0.001<br>N=79,341<br>R2=0.041  | 0.016<br>1.306<br>(-0.008 , 0.039)<br>p=0.192    | Chi2(67) = 898.4<br>p<0.001<br>N=31,769<br>R2=0.060 |
| 5 Years                                       | 0.150<br>13.170<br>(0.128 , 0.172)<br>p<0.001   | Chi2(67) = 4712<br>p<0.001<br>N=111,110<br>R2=0.049  | 0.138<br>10.023<br>(0.111 , 0.165)<br>p<0.001    | Chi2(67) = 3642<br>p<0.001<br>N=79,341<br>R2=0.064  | 0.074<br>4.981<br>(0.045 , 0.104)<br>p<0.001     | Chi2(67) = 1279<br>p<0.001<br>N=31,769<br>R2=0.060  |
| <b><u>Imprisonment for Any New Felony</u></b> |                                                 |                                                      |                                                  |                                                     |                                                  |                                                     |
| 1 Year                                        | -0.008<br>-1.902<br>(-0.016 , 0.000)<br>p=0.057 | Chi2(67) = 723.5<br>p<0.001<br>N=111,110<br>R2=0.005 | -0.012<br>-2.402<br>(-0.022 , -0.002)<br>p=0.016 | Chi2(67) = 579.1<br>p<0.001<br>N=79,341<br>R2=0.009 | -0.009<br>-1.853<br>(-0.018 , 0.001)<br>p=0.064  | Chi2(67) = 204.8<br>p<0.001<br>N=31,769<br>R2=0.005 |
| 3 Years                                       | -0.006<br>-0.612<br>(-0.025 , 0.013)<br>p=0.540 | Chi2(67) = 3731<br>p<0.001<br>N=111,110<br>R2=0.035  | -0.007<br>-0.579<br>(-0.030 , 0.016)<br>p=0.562  | Chi2(67) = 3051<br>p<0.001<br>N=79,341<br>R2=0.043  | -0.023<br>-2.101<br>(-0.044 , -0.002)<br>p=0.036 | Chi2(67) = 825.4<br>p<0.001<br>N=31,769<br>R2=0.036 |
| 5 Years                                       | 0.025<br>2.121<br>(0.002 , 0.049)<br>p=0.034    | Chi2(67) = 7090<br>p<0.001<br>N=111,110<br>R2=0.067  | 0.025<br>1.693<br>(-0.004 , 0.055)<br>p=0.090    | Chi2(67) = 5540<br>p<0.001<br>N=79,341<br>R2=0.074  | -0.014<br>-0.965<br>(-0.042 , 0.014)<br>p=0.335  | Chi2(67) = 1747<br>p<0.001<br>N=31,769<br>R2=0.064  |



| <b>B. Time Since Release</b>                                                                                       | <b>Entire Sample</b>                            |                                                     | <b>No Baseline Violent Offense</b>              |                                                    | <b>Baseline Violent Offense</b>                 |                                                     |
|--------------------------------------------------------------------------------------------------------------------|-------------------------------------------------|-----------------------------------------------------|-------------------------------------------------|----------------------------------------------------|-------------------------------------------------|-----------------------------------------------------|
| <b><u>Number of Arrests</u></b>                                                                                    |                                                 |                                                     |                                                 |                                                    |                                                 |                                                     |
| 1 Year                                                                                                             | 0.015<br>0.426<br>(-0.053 , 0.083)<br>p=0.670   | Chi2(67) = 1419<br>p<0.001<br>N=106,926<br>R2=0.008 | 0.016<br>0.371<br>(-0.067 , 0.098)<br>p=0.711   | Chi2(67) = 1187<br>p<0.001<br>N=78,856<br>R2=0.009 | -0.027<br>-0.546<br>(-0.126 , 0.071)<br>p=0.585 | Chi2(67) = 410.4<br>p<0.001<br>N=28,070<br>R2=0.007 |
| 3 Years                                                                                                            | 0.014<br>0.245<br>(-0.098 , 0.126)<br>p=0.806   | Chi2(67) = 3289<br>p<0.001<br>N=104,605<br>R2=0.025 | 0.024<br>0.331<br>(-0.116 , 0.163)<br>p=0.741   | Chi2(67) = 2548<br>p<0.001<br>N=78,425<br>R2=0.025 | -0.044<br>-0.518<br>(-0.212 , 0.123)<br>p=0.605 | Chi2(67) = 883.5<br>p<0.001<br>N=26,180<br>R2=0.030 |
| 5 Years                                                                                                            | 0.114<br>1.307<br>(-0.057 , 0.286)<br>p=0.191   | Chi2(67) = 4903<br>p<0.001<br>N=100,445<br>R2=0.036 | 0.116<br>1.055<br>(-0.100 , 0.332)<br>p=0.291   | Chi2(67) = 3854<br>p<0.001<br>N=76,748<br>R2=0.035 | 0.073<br>0.616<br>(-0.160 , 0.306)<br>p=0.538   | Chi2(67) = 1225<br>p<0.001<br>N=23,697<br>R2=0.048  |
| <b><u>Ever Arrested for Violent Crime (excludes certain weapons possession and nonviolent sexual offenses)</u></b> |                                                 |                                                     |                                                 |                                                    |                                                 |                                                     |
| 1 Year                                                                                                             | -0.004<br>-0.414<br>(-0.022 , 0.014)<br>p=0.679 | Chi2(67) = 1750<br>p<0.001<br>N=106,926<br>R2=0.014 | -0.001<br>-0.045<br>(-0.024 , 0.023)<br>p=0.964 | Chi2(67) = 1247<br>p<0.001<br>N=78,856<br>R2=0.014 | -0.022<br>-1.592<br>(-0.049 , 0.005)<br>p=0.111 | Chi2(67) = 567.6<br>p<0.001<br>N=28,070<br>R2=0.020 |
| 3 Years                                                                                                            | 0.014<br>0.973<br>(-0.014 , 0.042)<br>p=0.331   | Chi2(67) = 4166<br>p<0.001<br>N=104,605<br>R2=0.033 | 0.008<br>0.443<br>(-0.028 , 0.045)<br>p=0.658   | Chi2(67) = 2990<br>p<0.001<br>N=78,425<br>R2=0.032 | -0.025<br>-1.207<br>(-0.064 , 0.015)<br>p=0.227 | Chi2(67) = 1238<br>p<0.001<br>N=26,180<br>R2=0.043  |

|         |                                               |                                                     |                                               |                                                    |                                                 |                                                    |
|---------|-----------------------------------------------|-----------------------------------------------------|-----------------------------------------------|----------------------------------------------------|-------------------------------------------------|----------------------------------------------------|
| 5 Years | 0.021<br>1.071<br>(-0.018 , 0.060)<br>p=0.284 | Chi2(67) = 5710<br>p<0.001<br>N=100,445<br>R2=0.046 | 0.035<br>1.372<br>(-0.015 , 0.085)<br>p=0.170 | Chi2(67) = 4139<br>p<0.001<br>N=76,748<br>R2=0.044 | -0.046<br>-1.760<br>(-0.097 , 0.005)<br>p=0.078 | Chi2(67) = 1632<br>p<0.001<br>N=23,697<br>R2=0.059 |
|---------|-----------------------------------------------|-----------------------------------------------------|-----------------------------------------------|----------------------------------------------------|-------------------------------------------------|----------------------------------------------------|

**Conviction for Medium or High Severity Violent Crime (Maximum Sentence at least 49 months)**

|        |                                                 |                                                      |                                               |                                                   |                                                 |                                                     |
|--------|-------------------------------------------------|------------------------------------------------------|-----------------------------------------------|---------------------------------------------------|-------------------------------------------------|-----------------------------------------------------|
| 1 Year | -0.002<br>-0.599<br>(-0.011 , 0.006)<br>p=0.549 | Chi2(67) = 482.2<br>p<0.001<br>N=108,404<br>R2=0.001 | 0.004<br>0.733<br>(-0.006 , 0.013)<br>p=0.463 | Chi2(67) = 381<br>p<0.001<br>N=79,094<br>R2=0.001 | -0.004<br>-0.564<br>(-0.017 , 0.009)<br>p=0.573 | Chi2(67) = 230.1<br>p<0.001<br>N=29,310<br>R2=0.000 |
|--------|-------------------------------------------------|------------------------------------------------------|-----------------------------------------------|---------------------------------------------------|-------------------------------------------------|-----------------------------------------------------|

|         |                                                 |                                                     |                                                 |                                                     |                                                 |                                                     |
|---------|-------------------------------------------------|-----------------------------------------------------|-------------------------------------------------|-----------------------------------------------------|-------------------------------------------------|-----------------------------------------------------|
| 3 Years | -0.004<br>-0.485<br>(-0.018 , 0.011)<br>p=0.628 | Chi2(67) = 1354<br>p<0.001<br>N=107,425<br>R2=0.008 | -0.006<br>-0.661<br>(-0.024 , 0.012)<br>p=0.509 | Chi2(67) = 944.7<br>p<0.001<br>N=78,949<br>R2=0.008 | -0.016<br>-1.423<br>(-0.039 , 0.006)<br>p=0.155 | Chi2(67) = 485.9<br>p<0.001<br>N=28,476<br>R2=0.009 |
|---------|-------------------------------------------------|-----------------------------------------------------|-------------------------------------------------|-----------------------------------------------------|-------------------------------------------------|-----------------------------------------------------|

|         |                                                 |                                                     |                                                 |                                                    |                                                 |                                                     |
|---------|-------------------------------------------------|-----------------------------------------------------|-------------------------------------------------|----------------------------------------------------|-------------------------------------------------|-----------------------------------------------------|
| 5 Years | -0.002<br>-0.183<br>(-0.019 , 0.016)<br>p=0.855 | Chi2(67) = 2022<br>p<0.001<br>N=105,799<br>R2=0.015 | -0.004<br>-0.376<br>(-0.026 , 0.018)<br>p=0.707 | Chi2(67) = 1414<br>p<0.001<br>N=78,667<br>R2=0.014 | -0.011<br>-0.824<br>(-0.038 , 0.015)<br>p=0.410 | Chi2(67) = 671.3<br>p<0.001<br>N=27,132<br>R2=0.017 |
|---------|-------------------------------------------------|-----------------------------------------------------|-------------------------------------------------|----------------------------------------------------|-------------------------------------------------|-----------------------------------------------------|

**Conviction for Violent Crime Leading to Imprisonment**

|        |                                    |                                          |                                   |                                         |                                    |                                         |
|--------|------------------------------------|------------------------------------------|-----------------------------------|-----------------------------------------|------------------------------------|-----------------------------------------|
| 1 Year | 0.008<br>1.943<br>(-0.000 , 0.017) | Chi2(67) = 690.7<br>p<0.001<br>N=108,404 | 0.015<br>2.778<br>(0.004 , 0.025) | Chi2(67) = 501.7<br>p<0.001<br>N=79,094 | 0.002<br>0.349<br>(-0.011 , 0.016) | Chi2(67) = 273.7<br>p<0.001<br>N=29,310 |
|--------|------------------------------------|------------------------------------------|-----------------------------------|-----------------------------------------|------------------------------------|-----------------------------------------|

|         |                                              |                                                     |                                               |                                                    |                                               |                                                     |
|---------|----------------------------------------------|-----------------------------------------------------|-----------------------------------------------|----------------------------------------------------|-----------------------------------------------|-----------------------------------------------------|
|         | p=0.052                                      | R2=0.005                                            | p=0.005                                       | R2=0.002                                           | p=0.727                                       | R2=0.000                                            |
| 3 Years | 0.015<br>2.039<br>(0.001 , 0.030)<br>p=0.041 | Chi2(67) = 1910<br>p<0.001<br>N=107,425<br>R2=0.017 | 0.015<br>1.647<br>(-0.003 , 0.034)<br>p=0.100 | Chi2(67) = 1272<br>p<0.001<br>N=78,949<br>R2=0.014 | 0.002<br>0.199<br>(-0.020 , 0.025)<br>p=0.842 | Chi2(67) = 677.7<br>p<0.001<br>N=28,476<br>R2=0.009 |
| 5 Years | 0.020<br>2.200<br>(0.002 , 0.038)<br>p=0.028 | Chi2(67) = 2813<br>p<0.001<br>N=105,799<br>R2=0.026 | 0.019<br>1.603<br>(-0.004 , 0.041)<br>p=0.109 | Chi2(67) = 1881<br>p<0.001<br>N=78,667<br>R2=0.021 | 0.006<br>0.451<br>(-0.020 , 0.033)<br>p=0.652 | Chi2(67) = 967.9<br>p<0.001<br>N=27,132<br>R2=0.016 |

**Conviction for Violent Crime (excludes Assault/Resist/Obstruct Police without Injury - MCL 750.81d1)**

|         |                                                 |                                          |                                                 |                                                     |                                                 |                                                     |
|---------|-------------------------------------------------|------------------------------------------|-------------------------------------------------|-----------------------------------------------------|-------------------------------------------------|-----------------------------------------------------|
| 1 Year  | -0.004<br>-0.757<br>(-0.013 , 0.006)<br>p=0.449 | Chi2(67) = 627.7<br>p<0.001<br>N=108,404 | 0.002<br>0.430<br>(-0.008 , 0.013)<br>p=0.667   | Chi2(67) = 486.8<br>p<0.001<br>N=79,094<br>R2=0.004 | -0.010<br>-1.247<br>(-0.025 , 0.006)<br>p=0.212 | Chi2(67) = 223.4<br>p<0.001<br>N=29,310<br>R2=0.000 |
| 3 Years | -0.007<br>-0.788<br>(-0.024 , 0.010)<br>p=0.431 | Chi2(67) = 1789<br>p<0.001<br>N=107,425  | -0.017<br>-1.601<br>(-0.037 , 0.004)<br>p=0.109 | Chi2(67) = 1208<br>p<0.001<br>N=78,949<br>R2=0.012  | -0.026<br>-1.909<br>(-0.052 , 0.001)<br>p=0.056 | Chi2(67) = 602.1<br>p<0.001<br>N=28,476<br>R2=0.009 |
| 5 Years | -0.001<br>-0.067<br>(-0.022 , 0.020)            | Chi2(67) = 2801<br>p<0.001<br>N=105,799  | -0.018<br>-1.388<br>(-0.043 , 0.007)            | Chi2(67) = 1899<br>p<0.001<br>N=78,667              | -0.016<br>-1.020<br>(-0.048 , 0.015)            | Chi2(67) = 921.9<br>p<0.001<br>N=27,132             |

p=0.947

p=0.165

R2=0.020

p=0.308

R2=0.017

**Imprisonment for Any Reason**

|        |                 |                 |                 |                 |                 |                 |
|--------|-----------------|-----------------|-----------------|-----------------|-----------------|-----------------|
| 1 Year | 0.113           | Chi2(67) = 3660 | 0.108           | Chi2(67) = 2743 | 0.071           | Chi2(67) = 1066 |
|        | 10.995          | p<0.001         | 8.161           | p<0.001         | 4.995           | p<0.001         |
|        | (0.093 , 0.133) | N=108,014       | (0.082 , 0.133) | N=79,038        | (0.043 , 0.099) | N=28,976        |
|        | p<0.001         | R2=0.034        | p<0.001         | R2=0.043        | p<0.001         | R2=0.033        |

|         |                 |                  |                 |                 |                 |                 |
|---------|-----------------|------------------|-----------------|-----------------|-----------------|-----------------|
| 3 Years | 0.212           | Chi2(67) = 10402 | 0.197           | Chi2(67) = 7678 | 0.140           | Chi2(67) = 2902 |
|         | 14.613          | p<0.001          | 9.870           | p<0.001         | 7.067           | p<0.001         |
|         | (0.183 , 0.240) | N=106,859        | (0.158 , 0.237) | N=78,853        | (0.101 , 0.179) | N=28,006        |
|         | p<0.001         | R2=0.095         | p<0.001         | R2=0.105        | p<0.001         | R2=0.092        |

|         |                 |                  |                 |                  |                 |                 |
|---------|-----------------|------------------|-----------------|------------------|-----------------|-----------------|
| 5 Years | 0.226           | Chi2(67) = 14112 | 0.195           | Chi2(67) = 10450 | 0.145           | Chi2(67) = 3858 |
|         | 13.825          | p<0.001          | 8.814           | p<0.001          | 6.582           | p<0.001         |
|         | (0.194 , 0.258) | N=104,472        | (0.152 , 0.238) | N=78,384         | (0.102 , 0.188) | N=26,088        |
|         | p<0.001         | R2=0.127         | p<0.001         | R2=0.133         | p<0.001         | R2=0.124        |

**Imprisonment for Technical Violation**

|        |                 |                 |                 |                 |                 |                |
|--------|-----------------|-----------------|-----------------|-----------------|-----------------|----------------|
| 1 Year | 0.089           | Chi2(67) = 2105 | 0.074           | Chi2(67) = 1669 | 0.064           | Chi2(67) = 677 |
|        | 10.700          | p<0.001         | 7.060           | p<0.001         | 5.407           | p<0.001        |
|        | (0.073 , 0.105) | N=108,014       | (0.053 , 0.094) | N=79,038        | (0.041 , 0.088) | N=28,976       |
|        | p<0.001         | R2=0.020        | p<0.001         | R2=0.027        | p<0.001         | R2=0.024       |

|         |        |                 |       |                 |       |                 |
|---------|--------|-----------------|-------|-----------------|-------|-----------------|
| 3 Years | 0.171  | Chi2(67) = 4459 | 0.139 | Chi2(67) = 3455 | 0.132 | Chi2(67) = 1258 |
|         | 14.899 | p<0.001         | 8.886 | p<0.001         | 8.037 | p<0.001         |

|                                               |                                               |                                                     |                                              |                                                    |                                               |                                                     |
|-----------------------------------------------|-----------------------------------------------|-----------------------------------------------------|----------------------------------------------|----------------------------------------------------|-----------------------------------------------|-----------------------------------------------------|
|                                               | (0.148 , 0.193)<br>p<0.001                    | N=106,859<br>R2=0.048                               | (0.109 , 0.170)<br>p<0.001                   | N=78,853<br>R2=0.054                               | (0.099 , 0.164)<br>p<0.001                    | N=28,006<br>R2=0.052                                |
| 5 Years                                       | 0.189<br>14.423<br>(0.163 , 0.215)<br>p<0.001 | Chi2(67) = 5353<br>p<0.001<br>N=104,472<br>R2=0.061 | 0.147<br>8.287<br>(0.112 , 0.182)<br>p<0.001 | Chi2(67) = 4069<br>p<0.001<br>N=78,384<br>R2=0.069 | 0.134<br>7.316<br>(0.098 , 0.170)<br>p<0.001  | Chi2(67) = 1474<br>p<0.001<br>N=26,088<br>R2=0.065  |
| <b><u>Imprisonment for Any New Felony</u></b> |                                               |                                                     |                                              |                                                    |                                               |                                                     |
| 1 Year                                        | 0.025<br>3.837<br>(0.012 , 0.038)<br>p<0.001  | Chi2(67) = 1543<br>p<0.001<br>N=108,014<br>R2=0.015 | 0.035<br>3.982<br>(0.018 , 0.052)<br>p<0.001 | Chi2(67) = 1150<br>p<0.001<br>N=79,038<br>R2=0.019 | 0.009<br>1.060<br>(-0.008 , 0.025)<br>p=0.289 | Chi2(67) = 453.4<br>p<0.001<br>N=28,976<br>R2=0.016 |
| 3 Years                                       | 0.060<br>5.340<br>(0.038 , 0.083)<br>p<0.001  | Chi2(67) = 5255<br>p<0.001<br>N=106,859<br>R2=0.053 | 0.069<br>4.357<br>(0.038 , 0.099)<br>p<0.001 | Chi2(67) = 3901<br>p<0.001<br>N=78,853<br>R2=0.057 | 0.018<br>1.265<br>(-0.010 , 0.047)<br>p=0.206 | Chi2(67) = 1450<br>p<0.001<br>N=28,006<br>R2=0.053  |
| 5 Years                                       | 0.080<br>5.749<br>(0.052 , 0.107)<br>p<0.001  | Chi2(67) = 8152<br>p<0.001<br>N=104,472<br>R2=0.082 | 0.069<br>3.701<br>(0.033 , 0.106)<br>p<0.001 | Chi2(67) = 6028<br>p<0.001<br>N=78,384<br>R2=0.082 | 0.043<br>2.400<br>(0.008 , 0.078)<br>p=0.016  | Chi2(67) = 2245<br>p<0.001<br>N=26,088<br>R2=0.082  |

Model specifications as in Tables 1 and 2. Left column contains unstandardized beta coefficient representing the effect of Prison vs. Probation sentence at 24 month sentence lengths; z-statistic, 95% confidence interval in parentheses, and p-value from two tailed test. Right column contains model fit statistics: Wald Chi2 statistic and degrees of freedom in parentheses, p-value from two-tailed test, sample size, and R-squared.

**Supplementary Table 7.** Full Model Results for Models in Table 1 (Outcomes Measured by Time since Sentence)

|                                       | Entire Sample                    |                                  |                                  |                                  |                                  |                                  |
|---------------------------------------|----------------------------------|----------------------------------|----------------------------------|----------------------------------|----------------------------------|----------------------------------|
|                                       | Ever Arrested for Violent Crime  |                                  |                                  | Ever Convicted of Violent Crime  |                                  |                                  |
|                                       | 1 Year                           | 3 Years                          | 5 Years                          | 1 Year                           | 3 Years                          | 5 Years                          |
| Prison Only                           | -0.072                           | -0.099                           | -0.084                           | -0.012                           | -0.037                           | -0.024                           |
|                                       | -8.569                           | -7.550                           | -5.454                           | -2.850                           | -4.207                           | -2.226                           |
|                                       | p<0.001<br>(-0.089 , -<br>0.056) | p<0.001<br>(-0.125 , -<br>0.073) | p<0.001<br>(-0.114 , -<br>0.054) | p=0.004<br>(-0.021 , -<br>0.004) | p<0.001<br>(-0.055 , -<br>0.020) | p=0.026<br>(-0.045 , -<br>0.003) |
| Prison X Incarceration Length         | 0.000                            | -0.001                           | -0.002                           | -0.000                           | -0.000                           | -0.001                           |
|                                       | 0.799                            | -3.124                           | -5.418                           | -0.599                           | -2.324                           | -3.806                           |
|                                       | p=0.424<br>(-0.000 ,<br>0.001)   | p=0.002<br>(-0.002 , -<br>0.000) | p<0.001<br>(-0.003 , -<br>0.001) | p=0.549<br>(-0.000 ,<br>0.000)   | p=0.020<br>(-0.001 , -<br>0.000) | p<0.001<br>(-0.001 , -<br>0.000) |
| Prison X Incarceration Length Squared | -0.000                           | 0.000                            | 0.000                            | 0.000                            | 0.000                            | 0.000                            |
|                                       | -1.234                           | 1.239                            | 2.277                            | 0.827                            | 0.973                            | 1.516                            |
|                                       | p=0.217<br>(-0.000 ,<br>0.000)   | p=0.215<br>(-0.000 ,<br>0.000)   | p=0.023<br>(0.000 ,<br>0.000)    | p=0.408<br>(-0.000 ,<br>0.000)   | p=0.330<br>(-0.000 ,<br>0.000)   | p=0.129<br>(-0.000 ,<br>0.000)   |
| Probation X Probation Length          | -0.001                           | -0.002                           | -0.002                           | 0.000                            | 0.000                            | 0.001                            |
|                                       | -1.822                           | -3.361                           | -3.391                           | 1.092                            | 1.148                            | 1.091                            |
|                                       | p=0.068<br>(-0.002 ,<br>0.000)   | p<0.001<br>(-0.003 , -<br>0.001) | p<0.001<br>(-0.004 , -<br>0.001) | p=0.275<br>(-0.000 ,<br>0.001)   | p=0.251<br>(-0.000 ,<br>0.001)   | p=0.275<br>(-0.000 ,<br>0.001)   |
| Probation X Probation Length Squared  | -0.000                           | -0.000                           | -0.000                           | -0.000                           | -0.000                           | -0.000                           |
|                                       | -0.899                           | -0.373                           | -0.808                           | -2.247                           | -2.513                           | -1.929                           |
|                                       | p=0.368<br>(-0.000 ,<br>0.000)   | p=0.709<br>(-0.000 ,<br>0.000)   | p=0.419<br>(-0.000 ,<br>0.000)   | p=0.025<br>(-0.000 , -<br>0.000) | p=0.012<br>(-0.000 , -<br>0.000) | p=0.054<br>(-0.000 ,<br>0.000)   |
| Jail Only                             | -0.311                           | 0.062                            | 0.437                            | -0.034                           | -0.386                           | -0.369                           |
|                                       | -1.186                           | 0.151                            | 0.898                            | -0.270                           | -1.434                           | -1.083                           |
|                                       | p=0.236<br>(-0.824 ,             | p=0.880<br>(-0.744 ,             | p=0.369<br>(-0.516 ,             | p=0.787<br>(-0.282 ,             | p=0.152<br>(-0.913 ,             | p=0.279<br>(-1.036 ,             |

|                                                |           |           |             |           |           |           |
|------------------------------------------------|-----------|-----------|-------------|-----------|-----------|-----------|
|                                                | 0.203)    | 0.868)    | 1.390)      | 0.214)    | 0.142)    | 0.298)    |
| Jail X Incarceration Length                    | -0.042    | -0.011    | 0.037       | -0.004    | -0.057    | -0.061    |
|                                                | -1.340    | -0.219    | 0.626       | -0.286    | -1.781    | -1.497    |
|                                                | p=0.180   | p=0.826   | p=0.531     | p=0.775   | p=0.075   | p=0.134   |
|                                                | (-0.104 , | (-0.108 , | (-0.078 ,   | (-0.034 , | (-0.121 , | (-0.141 , |
|                                                | 0.020)    | 0.086)    | 0.151)      | 0.025)    | 0.006)    | 0.019)    |
| Jail X Incarceration Length Squared            | -0.001    | -0.001    | 0.001       | -0.000    | -0.002    | -0.002    |
|                                                | -1.354    | -0.383    | 0.479       | -0.229    | -1.955    | -1.717    |
|                                                | p=0.176   | p=0.702   | p=0.632     | p=0.819   | p=0.051   | p=0.086   |
|                                                | (-0.003 , | (-0.003 , | (-0.002 ,   | (-0.001 , | (-0.004 , | (-0.004 , |
|                                                | 0.001)    | 0.002)    | 0.004)      | 0.001)    | 0.000)    | 0.000)    |
| Jail with Probation Only                       | -0.008    | 0.008     | 0.002       | -0.002    | -0.002    | 0.002     |
|                                                | -1.287    | 0.783     | 0.151       | -0.766    | -0.233    | 0.252     |
|                                                | p=0.198   | p=0.434   | p=0.880     | p=0.444   | p=0.816   | p=0.801   |
|                                                | (-0.020 , | (-0.011 , | (-0.020 ,   | (-0.009 , | (-0.015 , | (-0.013 , |
|                                                | 0.004)    | 0.027)    | 0.024)      | 0.004)    | 0.011)    | 0.017)    |
| Jail with Probation X Probation Length         | -0.000    | -0.001    | -0.001      | -0.000    | -0.000    | 0.000     |
|                                                | -1.211    | -1.264    | -1.482      | -1.260    | -0.251    | 0.519     |
|                                                | p=0.226   | p=0.206   | p=0.138     | p=0.208   | p=0.801   | p=0.604   |
|                                                | (-0.001 , | (-0.002 , | (-0.002 ,   | (-0.000 , | (-0.001 , | (-0.001 , |
|                                                | 0.000)    | 0.000)    | 0.000)      | 0.000)    | 0.001)    | 0.001)    |
| Jail with Probation X Probation Length Squared | 0.000     | 0.000     | 0.000       | 0.000     | 0.000     | -0.000    |
|                                                | 1.356     | 1.260     | 1.157       | 1.317     | 0.470     | -0.487    |
|                                                | p=0.175   | p=0.208   | p=0.247     | p=0.188   | p=0.638   | p=0.626   |
|                                                | (-0.000 , | (-0.000 , | (-0.000 ,   | (-0.000 , | (-0.000 , | (-0.000 , |
|                                                | 0.000)    | 0.000)    | 0.000)      | 0.000)    | 0.000)    | 0.000)    |
| 0 Prior Felony                                 | 0.003     | -0.002    | -0.011      | -0.000    | -0.002    | -0.002    |
|                                                | 1.661     | -0.543    | -3.182      | -0.051    | -0.955    | -0.921    |
|                                                | p=0.097   | p=0.587   | p<0.001     | p=0.959   | p=0.339   | p=0.357   |
|                                                | (-0.001 , | (-0.008 , | (-0.018 , - | (-0.002 , | (-0.006 , | (-0.007 , |
|                                                | 0.007)    | 0.004)    | 0.004)      | 0.002)    | 0.002)    | 0.002)    |
| 5-9 Prior Arrests (ref: 0-4)                   | 0.020     | 0.050     | 0.064       | 0.003     | 0.018     | 0.027     |
|                                                | 11.309    | 18.367    | 20.366      | 3.836     | 10.413    | 12.386    |
|                                                | p<0.001   | p<0.001   | p<0.001     | p<0.001   | p<0.001   | p<0.001   |
|                                                | (0.017 ,  | (0.045 ,  | (0.058 ,    | (0.002 ,  | (0.015 ,  | (0.022 ,  |

|                                 |             |             |             |             |             |             |
|---------------------------------|-------------|-------------|-------------|-------------|-------------|-------------|
|                                 | 0.024)      | 0.056)      | 0.070)      | 0.005)      | 0.022)      | 0.031)      |
| 10+ Prior Arrests               | 0.035       | 0.083       | 0.108       | 0.005       | 0.035       | 0.052       |
|                                 | 14.222      | 21.631      | 24.684      | 4.531       | 14.124      | 17.075      |
|                                 | p<0.001     | p<0.001     | p<0.001     | p<0.001     | p<0.001     | p<0.001     |
|                                 | (0.031 ,    | (0.075 ,    | (0.100 ,    | (0.003 ,    | (0.030 ,    | (0.046 ,    |
|                                 | 0.040)      | 0.090)      | 0.117)      | 0.008)      | 0.040)      | 0.058)      |
| Non-White                       | 0.022       | 0.059       | 0.077       | 0.001       | 0.012       | 0.021       |
|                                 | 13.794      | 24.335      | 27.518      | 0.797       | 7.354       | 11.119      |
|                                 | p<0.001     | p<0.001     | p<0.001     | p=0.425     | p<0.001     | p<0.001     |
|                                 | (0.019 ,    | (0.054 ,    | (0.071 ,    | (-0.001 ,   | (0.008 ,    | (0.018 ,    |
|                                 | 0.025)      | 0.064)      | 0.082)      | 0.002)      | 0.015)      | 0.025)      |
| Age at Sentence Demeaned        | -0.002      | -0.005      | -0.007      | -0.001      | -0.003      | -0.004      |
|                                 | -19.928     | -34.112     | -40.530     | -12.912     | -25.928     | -32.145     |
|                                 | p<0.001     | p<0.001     | p<0.001     | p<0.001     | p<0.001     | p<0.001     |
|                                 | (-0.002 , - | (-0.005 , - | (-0.007 , - | (-0.001 , - | (-0.003 , - | (-0.004 , - |
|                                 | 0.002)      | 0.005)      | 0.006)      | 0.001)      | 0.002)      | 0.004)      |
| Age at Sentence Demeaned Square | 0.000       | 0.000       | 0.000       | 0.000       | 0.000       | 0.000       |
|                                 | 9.241       | 13.084      | 12.677      | 8.872       | 15.237      | 17.618      |
|                                 | p<0.001     | p<0.001     | p<0.001     | p<0.001     | p<0.001     | p<0.001     |
|                                 | (0.000 ,    | (0.000 ,    | (0.000 ,    | (0.000 ,    | (0.000 ,    | (0.000 ,    |
|                                 | 0.000)      | 0.000)      | 0.000)      | 0.000)      | 0.000)      | 0.000)      |
| Sex                             | -0.029      | -0.066      | -0.090      | -0.006      | -0.028      | -0.043      |
|                                 | -17.671     | -25.081     | -29.484     | -8.330      | -18.148     | -22.543     |
|                                 | p<0.001     | p<0.001     | p<0.001     | p<0.001     | p<0.001     | p<0.001     |
|                                 | (-0.032 , - | (-0.071 , - | (-0.096 , - | (-0.008 , - | (-0.031 , - | (-0.047 , - |
|                                 | 0.026)      | 0.060)      | 0.084)      | 0.005)      | 0.025)      | 0.039)      |
| GED                             | -0.003      | -0.008      | -0.011      | -0.001      | -0.002      | -0.002      |
|                                 | -1.205      | -2.286      | -2.937      | -0.498      | -0.725      | -0.896      |
|                                 | p=0.228     | p=0.022     | p=0.003     | p=0.618     | p=0.468     | p=0.370     |
|                                 | (-0.007 ,   | (-0.014 , - | (-0.019 , - | (-0.003 ,   | (-0.006 ,   | (-0.008 ,   |
|                                 | 0.002)      | 0.001)      | 0.004)      | 0.002)      | 0.003)      | 0.003)      |
| High School                     | -0.009      | -0.028      | -0.039      | -0.002      | -0.009      | -0.015      |
|                                 | -5.950      | -11.388     | -14.038     | -2.725      | -5.663      | -8.209      |
|                                 | p<0.001     | p<0.001     | p<0.001     | p=0.006     | p<0.001     | p<0.001     |
|                                 | (-0.012 , - | (-0.032 , - | (-0.045 , - | (-0.003 , - | (-0.012 , - | (-0.019 , - |



|                                                                |             |             |             |             |             |             |
|----------------------------------------------------------------|-------------|-------------|-------------|-------------|-------------|-------------|
|                                                                | 0.006)      | 0.023)      | 0.034)      | 0.001)      | 0.006)      | 0.012)      |
| More Than High School                                          | -0.013      | -0.036      | -0.052      | -0.001      | -0.007      | -0.014      |
|                                                                | -6.104      | -10.582     | -13.050     | -0.914      | -3.393      | -5.301      |
|                                                                | p<0.001     | p<0.001     | p<0.001     | p=0.361     | p<0.001     | p<0.001     |
|                                                                | (-0.017 , - | (-0.042 , - | (-0.059 , - | (-0.003 ,   | (-0.011 , - | (-0.019 , - |
|                                                                | 0.009)      | 0.029)      | 0.044)      | 0.001)      | 0.003)      | 0.009)      |
| Proportion of Quarters Employed in 23 quarters Before Sentence | -0.016      | -0.033      | -0.042      | -0.006      | -0.019      | -0.026      |
|                                                                | -7.761      | -9.927      | -10.861     | -5.989      | -9.331      | -10.511     |
|                                                                | p<0.001     | p<0.001     | p<0.001     | p<0.001     | p<0.001     | p<0.001     |
|                                                                | (-0.021 , - | (-0.040 , - | (-0.050 , - | (-0.008 , - | (-0.023 , - | (-0.031 , - |
|                                                                | 0.012)      | 0.027)      | 0.035)      | 0.004)      | 0.015)      | 0.021)      |
| Not Single                                                     | 0.004       | 0.014       | 0.017       | 0.001       | 0.003       | 0.004       |
|                                                                | 2.806       | 5.448       | 5.957       | 1.413       | 2.303       | 2.047       |
|                                                                | p=0.005     | p<0.001     | p<0.001     | p=0.158     | p=0.021     | p=0.041     |
|                                                                | (0.001 ,    | (0.009 ,    | (0.012 ,    | (-0.000 ,   | (0.001 ,    | (0.000 ,    |
|                                                                | 0.007)      | 0.018)      | 0.023)      | 0.002)      | 0.006)      | 0.008)      |
| Any Use of Alcohol                                             | 0.008       | 0.025       | 0.034       | 0.003       | 0.006       | 0.016       |
|                                                                | 4.795       | 9.445       | 11.320      | 3.247       | 3.709       | 7.815       |
|                                                                | p<0.001     | p<0.001     | p<0.001     | p<0.001     | p<0.001     | p<0.001     |
|                                                                | (0.005 ,    | (0.020 ,    | (0.028 ,    | (0.001 ,    | (0.003 ,    | (0.012 ,    |
|                                                                | 0.011)      | 0.030)      | 0.040)      | 0.004)      | 0.010)      | 0.020)      |
| Any Use of Marijuana                                           | 0.002       | 0.007       | 0.013       | 0.000       | 0.003       | 0.009       |
|                                                                | 1.257       | 2.940       | 4.833       | 0.662       | 2.299       | 5.061       |
|                                                                | p=0.209     | p=0.003     | p<0.001     | p=0.508     | p=0.022     | p<0.001     |
|                                                                | (-0.001 ,   | (0.002 ,    | (0.008 ,    | (-0.001 ,   | (0.000 ,    | (0.006 ,    |
|                                                                | 0.005)      | 0.012)      | 0.019)      | 0.002)      | 0.006)      | 0.013)      |
| Any Use of Stimulants (Cocaine or Amphetamine)                 | 0.003       | 0.013       | 0.022       | 0.002       | 0.012       | 0.024       |
|                                                                | 1.992       | 5.324       | 7.740       | 2.125       | 7.371       | 11.825      |
|                                                                | p=0.046     | p<0.001     | p<0.001     | p=0.034     | p<0.001     | p<0.001     |
|                                                                | (0.000 ,    | (0.008 ,    | (0.017 ,    | (0.000 ,    | (0.009 ,    | (0.020 ,    |
|                                                                | 0.006)      | 0.018)      | 0.028)      | 0.003)      | 0.015)      | 0.028)      |
| Any Use of Opioids                                             | -0.004      | -0.008      | -0.010      | 0.002       | 0.004       | 0.011       |
|                                                                | -1.909      | -2.356      | -2.526      | 1.493       | 1.809       | 3.853       |
|                                                                | p=0.056     | p=0.018     | p=0.012     | p=0.135     | p=0.070     | p<0.001     |

|                              |                                                  |                                                      |                                                             |                                                    |                                                    |                                                      |
|------------------------------|--------------------------------------------------|------------------------------------------------------|-------------------------------------------------------------|----------------------------------------------------|----------------------------------------------------|------------------------------------------------------|
| Any Use of Other Drugs       | (-0.008 ,<br>0.000)<br>0.001<br>0.393<br>p=0.694 | (-0.014 , -<br>0.001)<br>-0.000<br>-0.099<br>p=0.922 | (-0.017 , -<br>0.002)<br>-0.007<br>-2.127<br>p=0.033        | (-0.001 ,<br>0.004)<br>0.000<br>0.439<br>p=0.661   | (-0.000 ,<br>0.009)<br>0.001<br>0.722<br>p=0.471   | (0.005 ,<br>0.017)<br>0.001<br>0.465<br>p=0.642      |
| Corrected Mental Health Flag | (-0.003 ,<br>0.004)<br>0.013<br>7.692<br>p<0.001 | (-0.006 ,<br>0.005)<br>0.021<br>7.857<br>p<0.001     | (-0.013 , -<br>0.001)<br>0.001<br>0.025<br>8.329<br>p<0.001 | (-0.001 ,<br>0.002)<br>0.003<br>3.016<br>p=0.003   | (-0.002 ,<br>0.005)<br>0.010<br>5.587<br>p<0.001   | (-0.003 ,<br>0.005)<br>0.013<br>5.991<br>p<0.001     |
| 2004 Sentence Year           | (0.010 ,<br>0.017)<br>0.002<br>0.906<br>p=0.365  | (0.016 ,<br>0.026)<br>0.004<br>1.521<br>p=0.128      | (0.019 ,<br>0.031)<br>0.001<br>0.462<br>p=0.644             | (0.001 ,<br>0.004)<br>0.001<br>0.643<br>p=0.520    | (0.006 ,<br>0.013)<br>0.001<br>0.799<br>p=0.424    | (0.009 ,<br>0.017)<br>-0.001<br>-0.590<br>p=0.555    |
| 2005 Sentence Year           | (-0.002 ,<br>0.005)<br>0.000<br>0.183<br>p=0.855 | (-0.001 ,<br>0.010)<br>-0.001<br>-0.355<br>p=0.722   | (-0.005 ,<br>0.008)<br>-0.007<br>-2.035<br>p=0.042          | (-0.001 ,<br>0.002)<br>0.001<br>1.325<br>p=0.185   | (-0.002 ,<br>0.005)<br>-0.001<br>-0.740<br>p=0.459 | (-0.006 ,<br>0.003)<br>-0.006<br>-2.685<br>p=0.007   |
| 2006 Sentence Year           | (-0.003 ,<br>0.004)<br>0.003<br>1.477<br>p=0.140 | (-0.007 ,<br>0.005)<br>0.003<br>1.053<br>p=0.293     | (-0.013 , -<br>0.000)<br>-0.004<br>-1.163<br>p=0.245        | (-0.001 ,<br>0.003)<br>0.002<br>2.242<br>p=0.025   | (-0.005 ,<br>0.002)<br>-0.001<br>-0.437<br>p=0.662 | (-0.011 , -<br>0.002)<br>-0.006<br>-2.495<br>p=0.013 |
| 3, Allegan County            | (-0.001 ,<br>0.006)<br>0.007<br>1.267<br>p=0.205 | (-0.003 ,<br>0.009)<br>0.006<br>0.700<br>p=0.484     | (-0.010 ,<br>0.003)<br>0.028<br>2.562<br>p=0.010            | (0.000 ,<br>0.004)<br>-0.003<br>-1.034<br>p=0.301  | (-0.004 ,<br>0.003)<br>-0.008<br>-1.361<br>p=0.174 | (-0.010 , -<br>0.001)<br>-0.010<br>-1.391<br>p=0.164 |
| 5, Antrim County             | (-0.004 ,<br>0.018)<br>0.019<br>1.619<br>p=0.106 | (-0.011 ,<br>0.024)<br>0.058<br>2.806<br>p=0.005     | (0.007 ,<br>0.050)<br>0.078<br>3.189<br>p<0.001             | (-0.008 ,<br>0.002)<br>-0.004<br>-0.834<br>p=0.404 | (-0.019 ,<br>0.003)<br>-0.002<br>-0.174<br>p=0.862 | (-0.025 ,<br>0.004)<br>-0.020<br>-1.486<br>p=0.137   |

|                      |                                                    |                                                  |                                                  |                                                    |                                                    |                                                    |
|----------------------|----------------------------------------------------|--------------------------------------------------|--------------------------------------------------|----------------------------------------------------|----------------------------------------------------|----------------------------------------------------|
| 9, Bay County        | (-0.004 ,<br>0.042)<br>0.007<br>1.280<br>p=0.201   | (0.018 ,<br>0.099)<br>0.031<br>3.341<br>p<0.001  | (0.030 ,<br>0.126)<br>0.040<br>3.645<br>p<0.001  | (-0.012 ,<br>0.005)<br>-0.005<br>-2.554<br>p=0.011 | (-0.024 ,<br>0.020)<br>0.005<br>0.774<br>p=0.439   | (-0.045 ,<br>0.006)<br>0.016<br>2.015<br>p=0.044   |
| 11, Berrien County   | (-0.004 ,<br>0.018)<br>0.035<br>5.001<br>p<0.001   | (0.013 ,<br>0.050)<br>0.075<br>7.359<br>p<0.001  | (0.018 ,<br>0.061)<br>0.115<br>9.923<br>p<0.001  | (-0.010 ,<br>0.001)<br>0.007<br>2.036<br>p=0.042   | (-0.007 ,<br>0.017)<br>0.029<br>4.232<br>p<0.001   | (0.000 ,<br>0.032)<br>0.046<br>5.482<br>p<0.001    |
| 13, Calhoun County   | (0.021 ,<br>0.048)<br>0.010<br>2.134<br>p=0.033    | (0.055 ,<br>0.095)<br>0.059<br>7.737<br>p<0.001  | (0.092 ,<br>0.138)<br>0.087<br>9.940<br>p<0.001  | (0.000 ,<br>0.014)<br>0.000<br>0.043<br>p=0.966    | (0.016 ,<br>0.042)<br>0.013<br>2.513<br>p=0.012    | (0.030 ,<br>0.063)<br>0.016<br>2.689<br>p=0.007    |
| 19, Clinton County   | (0.001 ,<br>0.019)<br>0.006<br>0.673<br>p=0.501    | (0.044 ,<br>0.074)<br>0.032<br>1.909<br>p=0.056  | (0.070 ,<br>0.104)<br>0.029<br>1.557<br>p=0.119  | (-0.004 ,<br>0.005)<br>-0.009<br>-3.164<br>p=0.002 | (0.003 ,<br>0.022)<br>-0.008<br>-0.826<br>p=0.409  | (0.004 ,<br>0.028)<br>-0.022<br>-1.837<br>p=0.066  |
| 22, Dickinson County | (-0.012 ,<br>0.025)<br>-0.010<br>-1.369<br>p=0.171 | (-0.001 ,<br>0.065)<br>0.013<br>0.849<br>p=0.396 | (-0.008 ,<br>0.067)<br>0.013<br>0.778<br>p=0.437 | (-0.014 ,<br>0.003)<br>-0.005<br>-1.265<br>p=0.206 | (-0.028 ,<br>0.011)<br>-0.017<br>-2.014<br>p=0.044 | (-0.045 ,<br>0.001)<br>-0.015<br>-1.291<br>p=0.197 |
| 23, Eaton County     | (-0.025 ,<br>0.004)<br>0.017<br>2.501<br>p=0.012   | (-0.017 ,<br>0.042)<br>0.020<br>2.047<br>p=0.041 | (-0.020 ,<br>0.047)<br>0.023<br>2.010<br>p=0.044 | (-0.013 ,<br>0.003)<br>-0.004<br>-1.736<br>p=0.083 | (-0.033 ,<br>0.000)<br>-0.002<br>-0.315<br>p=0.753 | (-0.037 ,<br>0.008)<br>-0.004<br>-0.476<br>p=0.634 |
| 25, Genesee County   | (0.004 ,<br>0.030)<br>0.017<br>4.697<br>p<0.001    | (0.001 ,<br>0.039)<br>0.048<br>8.327<br>p<0.001  | (0.001 ,<br>0.045)<br>0.069<br>10.101<br>p<0.001 | (-0.009 ,<br>0.001)<br>-0.002<br>-1.445<br>p=0.149 | (-0.014 ,<br>0.010)<br>-0.003<br>-0.829<br>p=0.407 | (-0.019 ,<br>0.012)<br>-0.008<br>-1.895<br>p=0.058 |

|                           |                                                  |                                                  |                                                    |                                                    |                                                    |                                                    |
|---------------------------|--------------------------------------------------|--------------------------------------------------|----------------------------------------------------|----------------------------------------------------|----------------------------------------------------|----------------------------------------------------|
| 28, Grand Traverse County | (0.010 ,<br>0.024)<br>0.011<br>1.594<br>p=0.111  | (0.037 ,<br>0.060)<br>0.029<br>2.380<br>p=0.017  | (0.055 ,<br>0.082)<br>0.039<br>2.663<br>p=0.008    | (-0.006 ,<br>0.001)<br>-0.009<br>-5.767<br>p<0.001 | (-0.010 ,<br>0.004)<br>-0.019<br>-3.159<br>p=0.002 | (-0.017 ,<br>0.000)<br>-0.028<br>-3.299<br>p<0.001 |
| 29, Gratiot County        | (-0.003 ,<br>0.025)<br>0.002<br>0.286<br>p=0.775 | (0.005 ,<br>0.053)<br>0.023<br>1.476<br>p=0.140  | (0.010 ,<br>0.067)<br>0.036<br>1.860<br>p=0.063    | (-0.012 ,<br>0.006)<br>0.001<br>0.175<br>p=0.861   | (-0.031 ,<br>0.007)<br>-0.002<br>-0.207<br>p=0.836 | (-0.044 ,<br>0.011)<br>-0.001<br>-0.067<br>p=0.946 |
| 33, Ingham County         | (-0.014 ,<br>0.018)<br>0.041<br>7.724<br>p<0.001 | (-0.008 ,<br>0.055)<br>0.075<br>9.879<br>p<0.001 | (-0.002 ,<br>0.074)<br>0.095<br>11.189<br>p<0.001  | (-0.009 ,<br>0.011)<br>0.002<br>0.754<br>p=0.451   | (-0.022 ,<br>0.018)<br>0.012<br>2.426<br>p=0.015   | (-0.027 ,<br>0.025)<br>0.014<br>2.369<br>p=0.018   |
| 34, Ionia County          | (0.030 ,<br>0.051)<br>0.012<br>1.602<br>p=0.109  | (0.060 ,<br>0.090)<br>0.038<br>2.945<br>p=0.003  | (0.078 ,<br>0.111)<br>0.033<br>2.299<br>p=0.022    | (-0.003 ,<br>0.006)<br>0.003<br>0.654<br>p=0.513   | (0.002 ,<br>0.021)<br>0.005<br>0.642<br>p=0.521    | (0.002 ,<br>0.025)<br>0.005<br>0.543<br>p=0.587    |
| 35, Iosco County          | (-0.003 ,<br>0.027)<br>0.010<br>0.816<br>p=0.414 | (0.013 ,<br>0.063)<br>0.034<br>1.761<br>p=0.078  | (0.005 ,<br>0.062)<br>0.027<br>1.257<br>p=0.209    | (-0.006 ,<br>0.011)<br>-0.008<br>-2.126<br>p=0.033 | (-0.010 ,<br>0.021)<br>-0.015<br>-1.396<br>p=0.163 | (-0.014 ,<br>0.024)<br>-0.027<br>-2.108<br>p=0.035 |
| 37, Isabella County       | (-0.014 ,<br>0.034)<br>0.017<br>1.949<br>p=0.051 | (-0.004 ,<br>0.072)<br>0.007<br>0.535<br>p=0.592 | (-0.015 ,<br>0.069)<br>-0.000<br>-0.005<br>p=0.996 | (-0.015 ,<br>0.001)<br>-0.006<br>-2.159<br>p=0.031 | (-0.036 ,<br>0.006)<br>0.003<br>0.343<br>p=0.732   | (-0.053 ,<br>0.002)<br>-0.010<br>-1.044<br>p=0.296 |
| 38, Jackson County        | (-0.000 ,<br>0.035)<br>0.018<br>3.265<br>p<0.001 | (-0.018 ,<br>0.032)<br>0.051<br>5.896<br>p<0.001 | (-0.029 ,<br>0.029)<br>0.067<br>6.762<br>p<0.001   | (-0.012 ,<br>0.001)<br>0.003<br>1.018<br>p=0.309   | (-0.014 ,<br>0.020)<br>0.006<br>1.074<br>p=0.283   | (-0.030 ,<br>0.009)<br>0.002<br>0.249<br>p=0.804   |

|                       |                     |                     |                     |                     |                     |                     |
|-----------------------|---------------------|---------------------|---------------------|---------------------|---------------------|---------------------|
| 39, Kalamazoo County  | (0.007 ,<br>0.028)  | (0.034 ,<br>0.068)  | (0.048 ,<br>0.087)  | (-0.003 ,<br>0.008) | (-0.005 ,<br>0.017) | (-0.012 ,<br>0.015) |
|                       | 0.033               | 0.068               | 0.085               | 0.007               | 0.019               | 0.020               |
|                       | 6.527               | 9.060               | 9.937               | 2.694               | 3.893               | 3.431               |
|                       | p<0.001             | p<0.001             | p<0.001             | p=0.007             | p<0.001             | p<0.001             |
| 41, Kent County       | (0.023 ,<br>0.043)  | (0.053 ,<br>0.082)  | (0.068 ,<br>0.101)  | (0.002 ,<br>0.012)  | (0.009 ,<br>0.029)  | (0.009 ,<br>0.032)  |
|                       | 0.023               | 0.049               | 0.065               | -0.001              | 0.001               | 0.002               |
|                       | 6.187               | 8.652               | 9.780               | -0.845              | 0.346               | 0.405               |
|                       | p<0.001             | p<0.001             | p<0.001             | p=0.398             | p=0.729             | p=0.685             |
| 44, Lapeer County     | (0.016 ,<br>0.030)  | (0.038 ,<br>0.061)  | (0.052 ,<br>0.078)  | (-0.005 ,<br>0.002) | (-0.006 ,<br>0.008) | (-0.007 ,<br>0.011) |
|                       | 0.001               | 0.002               | 0.006               | -0.007              | -0.015              | -0.017              |
|                       | 0.100               | 0.134               | 0.426               | -2.464              | -2.245              | -1.965              |
|                       | p=0.920             | p=0.893             | p=0.670             | p=0.014             | p=0.025             | p=0.049             |
| 46, Lenawee County    | (-0.013 ,<br>0.014) | (-0.021 ,<br>0.024) | (-0.020 ,<br>0.032) | (-0.012 ,<br>0.001) | (-0.028 ,<br>0.002) | (-0.034 ,<br>0.000) |
|                       | 0.042               | 0.078               | 0.104               | 0.005               | 0.016               | 0.017               |
|                       | 4.285               | 5.229               | 6.089               | 1.204               | 1.690               | 1.418               |
|                       | p<0.001             | p<0.001             | p<0.001             | p=0.228             | p=0.091             | p=0.156             |
| 47, Livingston County | (0.023 ,<br>0.061)  | (0.049 ,<br>0.107)  | (0.071 ,<br>0.138)  | (-0.003 ,<br>0.014) | (-0.003 ,<br>0.035) | (-0.006 ,<br>0.040) |
|                       | -0.001              | -0.013              | -0.018              | -0.002              | -0.001              | 0.003               |
|                       | -0.194              | -1.855              | -2.074              | -0.914              | -0.292              | 0.390               |
|                       | p=0.846             | p=0.064             | p=0.038             | p=0.361             | p=0.770             | p=0.697             |
| 50, Macomb County     | (-0.009 ,<br>0.008) | (-0.027 ,<br>0.001) | (-0.034 ,<br>0.001) | (-0.007 ,<br>0.003) | (-0.012 ,<br>0.009) | (-0.010 ,<br>0.015) |
|                       | 0.001               | 0.011               | 0.012               | -0.002              | -0.000              | 0.000               |
|                       | 0.401               | 2.201               | 2.109               | -1.397              | -0.061              | 0.054               |
|                       | p=0.688             | p=0.028             | p=0.035             | p=0.162             | p=0.951             | p=0.957             |
| 56, Midland County    | (-0.005 ,<br>0.007) | (0.001 ,<br>0.020)  | (0.001 ,<br>0.023)  | (-0.005 ,<br>0.001) | (-0.007 ,<br>0.006) | (-0.008 ,<br>0.008) |
|                       | 0.002               | 0.011               | 0.023               | -0.002              | 0.004               | 0.006               |
|                       | 0.382               | 1.045               | 1.885               | -0.689              | 0.626               | 0.643               |
|                       | p=0.702             | p=0.296             | p=0.059             | p=0.491             | p=0.532             | p=0.521             |

|                     |                                                                        |                                                                        |                                                                        |                                                                           |                                                                           |                                                                           |
|---------------------|------------------------------------------------------------------------|------------------------------------------------------------------------|------------------------------------------------------------------------|---------------------------------------------------------------------------|---------------------------------------------------------------------------|---------------------------------------------------------------------------|
| 58, Monroe County   | (-0.010 ,<br>0.014)<br>0.018<br>2.786<br>p=0.005<br>(0.005 ,<br>0.031) | (-0.009 ,<br>0.030)<br>0.033<br>3.239<br>p<0.001<br>(0.013 ,<br>0.053) | (-0.001 ,<br>0.047)<br>0.047<br>3.970<br>p<0.001<br>(0.024 ,<br>0.071) | (-0.008 ,<br>0.004)<br>-0.001<br>-0.347<br>p=0.729<br>(-0.007 ,<br>0.005) | (-0.010 ,<br>0.019)<br>-0.004<br>-0.603<br>p=0.547<br>(-0.017 ,<br>0.009) | (-0.012 ,<br>0.023)<br>-0.014<br>-1.706<br>p=0.088<br>(-0.029 ,<br>0.002) |
| 59, Montcalm County | -0.004<br>-0.637<br>p=0.524<br>(-0.015 ,<br>0.008)                     | 0.005<br>0.456<br>p=0.649<br>(-0.016 ,<br>0.026)                       | 0.028<br>2.047<br>p=0.041<br>(0.001 ,<br>0.054)                        | -0.004<br>-1.411<br>p=0.158<br>(-0.010 ,<br>0.002)                        | -0.004<br>-0.511<br>p=0.609<br>(-0.018 ,<br>0.011)                        | 0.000<br>0.038<br>p=0.970<br>(-0.018 ,<br>0.019)                          |
| 61, Muskegon County | 0.022<br>5.292<br>p<0.001<br>(0.014 ,<br>0.030)                        | 0.069<br>10.141<br>p<0.001<br>(0.056 ,<br>0.083)                       | 0.093<br>11.839<br>p<0.001<br>(0.078 ,<br>0.109)                       | 0.005<br>2.181<br>p=0.029<br>(0.000 ,<br>0.009)                           | 0.022<br>4.874<br>p<0.001<br>(0.013 ,<br>0.031)                           | 0.033<br>5.964<br>p<0.001<br>(0.022 ,<br>0.044)                           |
| 62, Newaygo County  | -0.010<br>-1.366<br>p=0.172<br>(-0.024 ,<br>0.004)                     | 0.010<br>0.739<br>p=0.460<br>(-0.016 ,<br>0.035)                       | 0.009<br>0.628<br>p=0.530<br>(-0.020 ,<br>0.038)                       | -0.002<br>-0.486<br>p=0.627<br>(-0.010 ,<br>0.006)                        | -0.006<br>-0.783<br>p=0.434<br>(-0.022 ,<br>0.010)                        | -0.005<br>-0.465<br>p=0.642<br>(-0.025 ,<br>0.016)                        |
| 64, Oceana County   | 0.014<br>1.167<br>p=0.243<br>(-0.010 ,<br>0.038)                       | 0.022<br>1.175<br>p=0.240<br>(-0.015 ,<br>0.059)                       | 0.033<br>1.525<br>p=0.127<br>(-0.010 ,<br>0.076)                       | -0.003<br>-0.529<br>p=0.597<br>(-0.013 ,<br>0.008)                        | -0.007<br>-0.674<br>p=0.500<br>(-0.029 ,<br>0.014)                        | -0.015<br>-1.106<br>p=0.269<br>(-0.042 ,<br>0.012)                        |
| 70, Ottawa County   | 0.005<br>1.141<br>p=0.254<br>(-0.004 ,<br>0.015)                       | 0.001<br>0.143<br>p=0.887<br>(-0.013 ,<br>0.015)                       | 0.008<br>0.945<br>p=0.345<br>(-0.008 ,<br>0.024)                       | -0.000<br>-0.009<br>p=0.993<br>(-0.005 ,<br>0.005)                        | -0.002<br>-0.339<br>p=0.735<br>(-0.011 ,<br>0.008)                        | -0.001<br>-0.251<br>p=0.802<br>(-0.013 ,<br>0.010)                        |
| 73, Saginaw County  | 0.021<br>4.325<br>p<0.001                                              | 0.057<br>7.619<br>p<0.001                                              | 0.070<br>8.116<br>p<0.001                                              | -0.003<br>-1.474<br>p=0.141                                               | 0.001<br>0.318<br>p=0.750                                                 | 0.011<br>1.797<br>p=0.072                                                 |

|                                 |                     |                     |                     |                     |                     |                     |
|---------------------------------|---------------------|---------------------|---------------------|---------------------|---------------------|---------------------|
|                                 | (0.011 ,<br>0.030)  | (0.042 ,<br>0.072)  | (0.053 ,<br>0.086)  | (-0.007 ,<br>0.001) | (-0.007 ,<br>0.010) | (-0.001 ,<br>0.022) |
| 77, St. Clair County            | -0.001              | 0.004               | 0.016               | -0.002              | 0.004               | 0.004               |
|                                 | -0.287              | 0.636               | 1.944               | -0.925              | 0.920               | 0.703               |
|                                 | p=0.774             | p=0.525             | p=0.052             | p=0.355             | p=0.358             | p=0.482             |
|                                 | (-0.009 ,<br>0.007) | (-0.009 ,<br>0.018) | (-0.000 ,<br>0.032) | (-0.006 ,<br>0.002) | (-0.005 ,<br>0.014) | (-0.007 ,<br>0.016) |
| 78, St. Joseph County           | 0.004               | 0.012               | 0.025               | -0.007              | -0.003              | -0.006              |
|                                 | 0.472               | 0.850               | 1.512               | -1.931              | -0.279              | -0.533              |
|                                 | p=0.637             | p=0.395             | p=0.130             | p=0.053             | p=0.780             | p=0.594             |
|                                 | (-0.013 ,<br>0.022) | (-0.016 ,<br>0.040) | (-0.007 ,<br>0.058) | (-0.014 ,<br>0.000) | (-0.022 ,<br>0.016) | (-0.029 ,<br>0.017) |
| 81, Washtenaw County            | 0.006               | 0.030               | 0.037               | 0.005               | 0.007               | 0.012               |
|                                 | 1.406               | 4.264               | 4.497               | 2.074               | 1.491               | 1.949               |
|                                 | p=0.160             | p<0.001             | p<0.001             | p=0.038             | p=0.136             | p=0.051             |
|                                 | (-0.002 ,<br>0.015) | (0.016 ,<br>0.045)  | (0.021 ,<br>0.053)  | (0.000 ,<br>0.010)  | (-0.002 ,<br>0.016) | (-0.000 ,<br>0.023) |
| 84, Wayne County , AOI Docket   | 0.014               | 0.037               | 0.051               | 0.004               | 0.015               | 0.019               |
|                                 | 4.029               | 6.944               | 8.356               | 2.495               | 4.374               | 4.470               |
|                                 | p<0.001             | p<0.001             | p<0.001             | p=0.013             | p<0.001             | p<0.001             |
|                                 | (0.007 ,<br>0.020)  | (0.026 ,<br>0.047)  | (0.039 ,<br>0.063)  | (0.001 ,<br>0.008)  | (0.008 ,<br>0.022)  | (0.011 ,<br>0.027)  |
| 85, Wayne County , Trial Docket | 0.017               | 0.045               | 0.053               | 0.004               | 0.015               | 0.017               |
|                                 | 5.514               | 9.442               | 9.606               | 2.633               | 4.688               | 4.477               |
|                                 | p<0.001             | p<0.001             | p<0.001             | p=0.008             | p<0.001             | p<0.001             |
|                                 | (0.011 ,<br>0.023)  | (0.035 ,<br>0.054)  | (0.042 ,<br>0.064)  | (0.001 ,<br>0.007)  | (0.008 ,<br>0.021)  | (0.010 ,<br>0.024)  |
| Constant                        | 0.024               | 0.050               | 0.099               | 0.009               | 0.028               | 0.034               |
|                                 | 4.031               | 5.458               | 9.168               | 2.789               | 4.351               | 4.475               |
|                                 | p<0.001             | p<0.001             | p<0.001             | p=0.005             | p<0.001             | p<0.001             |
|                                 | (0.012 ,<br>0.036)  | (0.032 ,<br>0.068)  | (0.078 ,<br>0.120)  | (0.003 ,<br>0.015)  | (0.016 ,<br>0.041)  | (0.019 ,<br>0.049)  |
| Observations                    | 111,099             | 111,099             | 111,099             | 111,110             | 111,110             | 111,110             |
| Wald Chi2                       | 1978                | 6092                | 9663                | 793.4               | 2533                | 4451                |

| Degrees of Freedom                    | 67                                                   | 67                                                   | 67                                                   | 67                                                   | 67                                                   | 67                                                   |
|---------------------------------------|------------------------------------------------------|------------------------------------------------------|------------------------------------------------------|------------------------------------------------------|------------------------------------------------------|------------------------------------------------------|
| P-value                               | p<0.001                                              | p<0.001                                              | p<0.001                                              | p<0.001                                              | p<0.001                                              | p<0.001                                              |
| R-square                              | 0.030                                                | 0.069                                                | 0.088                                                | 0.005                                                | 0.024                                                | 0.043                                                |
| <b>No Baseline Violent Offense</b>    |                                                      |                                                      |                                                      |                                                      |                                                      |                                                      |
|                                       | <b>Ever Arrested for Violent Crime</b>               |                                                      |                                                      | <b>Ever Convicted of Violent Crime</b>               |                                                      |                                                      |
|                                       | <b>1 Year</b>                                        | <b>3 Years</b>                                       | <b>5 Years</b>                                       | <b>1 Year</b>                                        | <b>3 Years</b>                                       | <b>5 Years</b>                                       |
| Prison Only                           | -0.054<br>-5.581<br>p<0.001<br>(-0.073 , -<br>0.035) | -0.082<br>-5.164<br>p<0.001<br>(-0.113 , -<br>0.051) | -0.046<br>-2.481<br>p=0.013<br>(-0.081 , -<br>0.010) | -0.010<br>-2.120<br>p=0.034<br>(-0.019 , -<br>0.001) | -0.039<br>-3.960<br>p<0.001<br>(-0.058 , -<br>0.020) | -0.025<br>-2.030<br>p=0.042<br>(-0.049 , -<br>0.001) |
| Prison X Incarceration Length         | 0.001<br>1.185<br>p=0.236<br>(-0.001 ,<br>0.002)     | -0.002<br>-1.813<br>p=0.070<br>(-0.004 ,<br>0.000)   | -0.002<br>-1.516<br>p=0.130<br>(-0.005 ,<br>0.001)   | -0.000<br>-1.109<br>p=0.267<br>(-0.001 ,<br>0.000)   | -0.003<br>-3.966<br>p<0.001<br>(-0.004 , -<br>0.001) | -0.003<br>-2.980<br>p=0.003<br>(-0.005 , -<br>0.001) |
| Prison X Incarceration Length Squared | -0.000<br>-1.651<br>p=0.099<br>(-0.000 ,<br>0.000)   | 0.000<br>0.551<br>p=0.582<br>(-0.000 ,<br>0.000)     | 0.000<br>0.253<br>p=0.800<br>(-0.000 ,<br>0.000)     | 0.000<br>0.529<br>p=0.597<br>(-0.000 ,<br>0.000)     | 0.000<br>2.996<br>p=0.003<br>(0.000 ,<br>0.000)      | 0.000<br>1.658<br>p=0.097<br>(-0.000 ,<br>0.000)     |
| Probation X Probation Length          | -0.000<br>-0.667<br>p=0.505<br>(-0.001 ,<br>0.001)   | -0.002<br>-3.054<br>p=0.002<br>(-0.003 , -<br>0.001) | -0.002<br>-3.544<br>p<0.001<br>(-0.004 , -<br>0.001) | 0.000<br>0.147<br>p=0.883<br>(-0.000 ,<br>0.000)     | -0.000<br>-0.184<br>p=0.854<br>(-0.001 ,<br>0.001)   | -0.000<br>-0.304<br>p=0.761<br>(-0.001 ,<br>0.001)   |
| Probation X Probation Length Squared  | -0.000<br>-0.746<br>p=0.456<br>(-0.000 ,<br>0.000)   | 0.000<br>1.121<br>p=0.262<br>(-0.000 ,<br>0.000)     | 0.000<br>0.718<br>p=0.473<br>(-0.000 ,<br>0.000)     | -0.000<br>-0.785<br>p=0.432<br>(-0.000 ,<br>0.000)   | -0.000<br>-1.289<br>p=0.197<br>(-0.000 ,<br>0.000)   | -0.000<br>-1.009<br>p=0.313<br>(-0.000 ,<br>0.000)   |
| Jail Only                             | -0.219<br>-0.869                                     | 0.251<br>0.597                                       | 0.085<br>0.179                                       | -0.015<br>-0.134                                     | -0.041<br>-0.154                                     | 0.140<br>0.397                                       |



|                                                |                                                    |                                                    |                                                    |                                                    |                                                    |                                                    |
|------------------------------------------------|----------------------------------------------------|----------------------------------------------------|----------------------------------------------------|----------------------------------------------------|----------------------------------------------------|----------------------------------------------------|
| Jail X Incarceration Length                    | p=0.385<br>(-0.713 ,<br>0.275)<br>-0.028<br>-0.931 | p=0.550<br>(-0.572 ,<br>1.074)<br>0.014<br>0.288   | p=0.858<br>(-0.848 ,<br>1.019)<br>0.002<br>0.031   | p=0.893<br>(-0.229 ,<br>0.199)<br>-0.002<br>-0.175 | p=0.878<br>(-0.557 ,<br>0.476)<br>-0.013<br>-0.410 | p=0.691<br>(-0.549 ,<br>0.828)<br>0.003<br>0.076   |
| Jail X Incarceration Length Squared            | p=0.352<br>(-0.087 ,<br>0.031)<br>-0.001<br>-0.886 | p=0.773<br>(-0.084 ,<br>0.112)<br>0.000<br>0.149   | p=0.975<br>(-0.109 ,<br>0.113)<br>-0.000<br>-0.032 | p=0.861<br>(-0.028 ,<br>0.023)<br>-0.000<br>-0.131 | p=0.682<br>(-0.074 ,<br>0.049)<br>-0.001<br>-0.588 | p=0.939<br>(-0.079 ,<br>0.085)<br>-0.000<br>-0.136 |
| Jail with Probation Only                       | p=0.376<br>(-0.002 ,<br>0.001)<br>-0.004<br>-0.584 | p=0.882<br>(-0.003 ,<br>0.003)<br>0.016<br>1.493   | p=0.974<br>(-0.003 ,<br>0.003)<br>0.017<br>1.466   | p=0.896<br>(-0.001 ,<br>0.001)<br>0.000<br>0.115   | p=0.557<br>(-0.002 ,<br>0.001)<br>0.000<br>0.051   | p=0.892<br>(-0.002 ,<br>0.002)<br>0.007<br>0.903   |
| Jail with Probation X Probation Length         | p=0.559<br>(-0.017 ,<br>0.009)<br>-0.000<br>-0.918 | p=0.136<br>(-0.005 ,<br>0.036)<br>-0.000<br>-0.839 | p=0.143<br>(-0.006 ,<br>0.041)<br>-0.000<br>-0.333 | p=0.909<br>(-0.006 ,<br>0.007)<br>0.000<br>0.417   | p=0.959<br>(-0.013 ,<br>0.013)<br>-0.000<br>-0.544 | p=0.367<br>(-0.009 ,<br>0.023)<br>0.000<br>0.976   |
| Jail with Probation X Probation Length Squared | p=0.358<br>(-0.001 ,<br>0.000)<br>0.000<br>0.935   | p=0.402<br>(-0.001 ,<br>0.001)<br>0.000<br>0.427   | p=0.739<br>(-0.001 ,<br>0.001)<br>0.000<br>0.328   | p=0.677<br>(-0.000 ,<br>0.000)<br>-0.000<br>-0.528 | p=0.586<br>(-0.001 ,<br>0.000)<br>-0.000<br>-0.525 | p=0.329<br>(-0.000 ,<br>0.001)<br>-0.000<br>-1.106 |
| 0 Prior Felony                                 | p=0.350<br>(-0.000 ,<br>0.000)<br>0.004<br>1.724   | p=0.670<br>(-0.000 ,<br>0.000)<br>-0.001<br>-0.267 | p=0.743<br>(-0.000 ,<br>0.000)<br>-0.010<br>-2.475 | p=0.597<br>(-0.000 ,<br>0.000)<br>-0.000<br>-0.179 | p=0.599<br>(-0.000 ,<br>0.000)<br>-0.003<br>-1.182 | p=0.269<br>(-0.000 ,<br>0.000)<br>-0.003<br>-0.925 |
| 5-9 Prior Arrests (ref: 0-4)                   | p=0.085<br>(-0.001 ,<br>0.009)<br>0.019<br>9.133   | p=0.789<br>(-0.008 ,<br>0.006)<br>0.050<br>15.351  | p=0.013<br>(-0.019 ,<br>0.002)<br>0.063<br>17.005  | p=0.858<br>(-0.002 ,<br>0.002)<br>0.003<br>2.627   | p=0.237<br>(-0.007 ,<br>0.002)<br>0.019<br>9.285   | p=0.355<br>(-0.008 ,<br>0.003)<br>0.027<br>10.795  |

|                                 |                                  |                                  |                                  |                                  |                                  |                                  |
|---------------------------------|----------------------------------|----------------------------------|----------------------------------|----------------------------------|----------------------------------|----------------------------------|
|                                 | p<0.001<br>(0.015 ,<br>0.023)    | p<0.001<br>(0.044 ,<br>0.056)    | p<0.001<br>(0.056 ,<br>0.070)    | p=0.009<br>(0.001 ,<br>0.005)    | p<0.001<br>(0.015 ,<br>0.023)    | p<0.001<br>(0.022 ,<br>0.032)    |
| 10+ Prior Arrests               | 0.033                            | 0.080                            | 0.102                            | 0.005                            | 0.035                            | 0.051                            |
|                                 | 10.828                           | 16.993                           | 18.934                           | 3.695                            | 11.745                           | 13.816                           |
|                                 | p<0.001<br>(0.027 ,<br>0.039)    | p<0.001<br>(0.071 ,<br>0.090)    | p<0.001<br>(0.092 ,<br>0.113)    | p<0.001<br>(0.002 ,<br>0.008)    | p<0.001<br>(0.029 ,<br>0.041)    | p<0.001<br>(0.044 ,<br>0.058)    |
| Non-White                       | 0.024                            | 0.063                            | 0.083                            | 0.001                            | 0.013                            | 0.023                            |
|                                 | 13.110                           | 22.036                           | 25.342                           | 1.257                            | 7.339                            | 10.626                           |
|                                 | p<0.001<br>(0.020 ,<br>0.028)    | p<0.001<br>(0.057 ,<br>0.069)    | p<0.001<br>(0.077 ,<br>0.090)    | p=0.209<br>(-0.001 ,<br>0.003)   | p<0.001<br>(0.010 ,<br>0.017)    | p<0.001<br>(0.019 ,<br>0.028)    |
| Age at Sentence Demeaned        | -0.002                           | -0.006                           | -0.008                           | -0.001                           | -0.003                           | -0.004                           |
|                                 | -19.806                          | -32.315                          | -37.626                          | -12.216                          | -24.219                          | -29.294                          |
|                                 | p<0.001<br>(-0.002 , -<br>0.002) | p<0.001<br>(-0.006 , -<br>0.005) | p<0.001<br>(-0.008 , -<br>0.007) | p<0.001<br>(-0.001 , -<br>0.001) | p<0.001<br>(-0.003 , -<br>0.003) | p<0.001<br>(-0.004 , -<br>0.004) |
| Age at Sentence Demeaned Square | 0.000                            | 0.000                            | 0.000                            | 0.000                            | 0.000                            | 0.000                            |
|                                 | 8.949                            | 12.031                           | 11.109                           | 7.885                            | 13.253                           | 14.688                           |
|                                 | p<0.001<br>(0.000 ,<br>0.000)    |
| Sex                             | -0.028                           | -0.065                           | -0.088                           | -0.006                           | -0.026                           | -0.040                           |
|                                 | -17.151                          | -24.122                          | -27.687                          | -7.499                           | -17.043                          | -20.624                          |
|                                 | p<0.001<br>(-0.031 , -<br>0.025) | p<0.001<br>(-0.070 , -<br>0.060) | p<0.001<br>(-0.094 , -<br>0.082) | p<0.001<br>(-0.007 , -<br>0.004) | p<0.001<br>(-0.029 , -<br>0.023) | p<0.001<br>(-0.043 , -<br>0.036) |
| GED                             | -0.004                           | -0.008                           | -0.011                           | 0.000                            | -0.001                           | -0.001                           |
|                                 | -1.572                           | -2.063                           | -2.418                           | 0.082                            | -0.426                           | -0.279                           |
|                                 | p=0.116<br>(-0.009 ,<br>0.001)   | p=0.039<br>(-0.016 , -<br>0.000) | p=0.016<br>(-0.020 , -<br>0.002) | p=0.935<br>(-0.002 ,<br>0.003)   | p=0.670<br>(-0.006 ,<br>0.004)   | p=0.781<br>(-0.007 ,<br>0.005)   |
| High School                     | -0.009                           | -0.029                           | -0.040                           | -0.002                           | -0.008                           | -0.016                           |
|                                 | -4.854                           | -10.152                          | -12.197                          | -2.204                           | -4.879                           | -7.427                           |

|                                                                |                                                      |                                                      |                                                       |                                                      |                                                      |                                                      |
|----------------------------------------------------------------|------------------------------------------------------|------------------------------------------------------|-------------------------------------------------------|------------------------------------------------------|------------------------------------------------------|------------------------------------------------------|
| More Than High School                                          | p<0.001<br>(-0.012 , -<br>0.005)<br>-0.012<br>-4.685 | p<0.001<br>(-0.034 , -<br>0.023)<br>-0.035<br>-8.990 | p<0.001<br>(-0.046 , -<br>0.033)<br>-0.050<br>-10.883 | p=0.028<br>(-0.003 , -<br>0.000)<br>-0.001<br>-0.547 | p<0.001<br>(-0.012 , -<br>0.005)<br>-0.008<br>-3.528 | p<0.001<br>(-0.020 , -<br>0.012)<br>-0.014<br>-4.742 |
| Proportion of Quarters Employed in 23 quarters Before Sentence | p<0.001<br>(-0.016 , -<br>0.007)<br>-0.017<br>-7.058 | p<0.001<br>(-0.043 , -<br>0.028)<br>-0.037<br>-9.550 | p<0.001<br>(-0.059 , -<br>0.041)<br>-0.044<br>-9.805  | p=0.584<br>(-0.003 ,<br>0.002)<br>-0.006<br>-5.528   | p<0.001<br>(-0.013 , -<br>0.004)<br>-0.018<br>-8.096 | p<0.001<br>(-0.020 , -<br>0.008)<br>-0.025<br>-8.772 |
| Not Single                                                     | p<0.001<br>(-0.022 , -<br>0.013)<br>0.006<br>3.642   | p<0.001<br>(-0.045 , -<br>0.030)<br>0.015<br>5.208   | p<0.001<br>(-0.053 , -<br>0.036)<br>0.019<br>5.498    | p<0.001<br>(-0.008 , -<br>0.004)<br>0.001<br>1.418   | p<0.001<br>(-0.023 , -<br>0.014)<br>0.005<br>3.002   | p<0.001<br>(-0.030 , -<br>0.019)<br>0.006<br>2.943   |
| Any Use of Alcohol                                             | p<0.001<br>(0.003 ,<br>0.010)<br>0.009<br>4.673      | p<0.001<br>(0.009 ,<br>0.021)<br>0.025<br>8.381      | p<0.001<br>(0.012 ,<br>0.025)<br>0.032<br>9.071       | p=0.156<br>(-0.000 ,<br>0.003)<br>0.002<br>1.918     | p=0.003<br>(0.002 ,<br>0.009)<br>0.005<br>2.419      | p=0.003<br>(0.002 ,<br>0.011)<br>0.014<br>5.704      |
| Any Use of Marijuana                                           | p<0.001<br>(0.005 ,<br>0.013)<br>0.002<br>1.282      | p<0.001<br>(0.020 ,<br>0.031)<br>0.008<br>2.911      | p<0.001<br>(0.025 ,<br>0.039)<br>0.014<br>4.509       | p=0.055<br>(-0.000 ,<br>0.004)<br>0.001<br>0.905     | p=0.016<br>(0.001 ,<br>0.009)<br>0.004<br>2.556      | p<0.001<br>(0.009 ,<br>0.018)<br>0.009<br>4.199      |
| Any Use of Stimulants (Cocaine or Amphetamine)                 | p=0.200<br>(-0.001 ,<br>0.006)<br>0.005<br>2.847     | p=0.004<br>(0.003 ,<br>0.013)<br>0.016<br>5.633      | p<0.001<br>(0.008 ,<br>0.021)<br>0.026<br>7.683       | p=0.366<br>(-0.001 ,<br>0.002)<br>0.002<br>2.446     | p=0.011<br>(0.001 ,<br>0.007)<br>0.013<br>7.006      | p<0.001<br>(0.005 ,<br>0.013)<br>0.024<br>10.796     |
| Any Use of Opioids                                             | p=0.004<br>(0.002 ,<br>0.009)<br>-0.002<br>-0.728    | p<0.001<br>(0.011 ,<br>0.022)<br>-0.005<br>-1.218    | p<0.001<br>(0.019 ,<br>0.032)<br>-0.006<br>-1.482     | p=0.014<br>(0.000 ,<br>0.004)<br>0.002<br>1.797      | p<0.001<br>(0.009 ,<br>0.016)<br>0.006<br>2.369      | p<0.001<br>(0.020 ,<br>0.029)<br>0.013<br>4.201      |

|                              |                                                    |                                                    |                                                    |                                                    |                                                    |                                                      |
|------------------------------|----------------------------------------------------|----------------------------------------------------|----------------------------------------------------|----------------------------------------------------|----------------------------------------------------|------------------------------------------------------|
| Any Use of Other Drugs       | p=0.467<br>(-0.006 ,<br>0.003)<br>0.000<br>0.185   | p=0.223<br>(-0.012 ,<br>0.003)<br>-0.001<br>-0.264 | p=0.138<br>(-0.015 ,<br>0.002)<br>-0.009<br>-2.529 | p=0.072<br>(-0.000 ,<br>0.005)<br>-0.001<br>-0.652 | p=0.018<br>(0.001 ,<br>0.011)<br>0.000<br>0.174    | p<0.001<br>(0.007 ,<br>0.020)<br>-0.000<br>-0.042    |
| Corrected Mental Health Flag | p=0.853<br>(-0.004 ,<br>0.004)<br>0.012<br>5.894   | p=0.792<br>(-0.007 ,<br>0.005)<br>0.020<br>6.346   | p=0.011<br>(-0.017 , -<br>0.002)<br>0.028<br>7.676 | p=0.515<br>(-0.003 ,<br>0.001)<br>0.002<br>2.214   | p=0.862<br>(-0.004 ,<br>0.004)<br>0.010<br>4.907   | p=0.966<br>(-0.005 ,<br>0.005)<br>0.013<br>4.991     |
| 2004 Sentence Year           | p<0.001<br>(0.008 ,<br>0.017)<br>0.002<br>0.914    | p<0.001<br>(0.014 ,<br>0.027)<br>0.006<br>1.716    | p<0.001<br>(0.021 ,<br>0.036)<br>0.004<br>1.163    | p=0.027<br>(0.000 ,<br>0.004)<br>0.002<br>1.567    | p<0.001<br>(0.006 ,<br>0.014)<br>-0.000<br>-0.020  | p<0.001<br>(0.008 ,<br>0.018)<br>-0.003<br>-1.099    |
| 2005 Sentence Year           | p=0.361<br>(-0.002 ,<br>0.006)<br>-0.001<br>-0.448 | p=0.086<br>(-0.001 ,<br>0.012)<br>0.000<br>0.105   | p=0.245<br>(-0.003 ,<br>0.012)<br>-0.004<br>-0.923 | p=0.117<br>(-0.000 ,<br>0.003)<br>0.002<br>2.104   | p=0.984<br>(-0.004 ,<br>0.004)<br>0.000<br>0.034   | p=0.272<br>(-0.008 ,<br>0.002)<br>-0.005<br>-1.841   |
| 2006 Sentence Year           | p=0.654<br>(-0.005 ,<br>0.003)<br>0.002<br>1.048   | p=0.917<br>(-0.006 ,<br>0.007)<br>0.002<br>0.481   | p=0.356<br>(-0.011 ,<br>0.004)<br>-0.004<br>-0.910 | p=0.035<br>(0.000 ,<br>0.004)<br>0.003<br>2.791    | p=0.973<br>(-0.004 ,<br>0.004)<br>-0.000<br>-0.126 | p=0.066<br>(-0.010 ,<br>0.000)<br>-0.005<br>-1.963   |
| 3, Allegan County            | p=0.295<br>(-0.002 ,<br>0.007)<br>0.007<br>0.959   | p=0.630<br>(-0.005 ,<br>0.008)<br>0.003<br>0.245   | p=0.363<br>(-0.011 ,<br>0.004)<br>0.019<br>1.420   | p=0.005<br>(0.001 ,<br>0.005)<br>-0.002<br>-0.513  | p=0.900<br>(-0.004 ,<br>0.004)<br>-0.001<br>-0.199 | p=0.050<br>(-0.010 , -<br>0.000)<br>-0.009<br>-1.107 |
| 5, Antrim County             | p=0.338<br>(-0.007 ,<br>0.020)<br>0.014<br>0.991   | p=0.807<br>(-0.018 ,<br>0.023)<br>0.068<br>2.522   | p=0.156<br>(-0.007 ,<br>0.044)<br>0.077<br>2.522   | p=0.608<br>(-0.008 ,<br>0.004)<br>-0.003<br>-0.495 | p=0.842<br>(-0.015 ,<br>0.012)<br>0.000<br>0.021   | p=0.268<br>(-0.026 ,<br>0.007)<br>-0.022<br>-1.359   |

|                      |                                                    |                                                  |                                                   |                                                      |                                                    |                                                    |
|----------------------|----------------------------------------------------|--------------------------------------------------|---------------------------------------------------|------------------------------------------------------|----------------------------------------------------|----------------------------------------------------|
| 9, Bay County        | p=0.322<br>(-0.014 ,<br>0.043)<br>0.005<br>0.735   | p=0.012<br>(0.015 ,<br>0.121)<br>0.023<br>2.085  | p=0.012<br>(0.017 ,<br>0.137)<br>0.033<br>2.561   | p=0.620<br>(-0.016 ,<br>0.009)<br>-0.005<br>-2.072   | p=0.983<br>(-0.027 ,<br>0.028)<br>0.002<br>0.315   | p=0.174<br>(-0.053 ,<br>0.010)<br>0.012<br>1.303   |
| 11, Berrien County   | p=0.462<br>(-0.008 ,<br>0.018)<br>0.023<br>2.877   | p=0.037<br>(0.001 ,<br>0.045)<br>0.065<br>5.162  | p=0.010<br>(0.008 ,<br>0.059)<br>0.104<br>7.224   | p=0.038<br>(-0.011 , -<br>0.000)<br>0.007<br>1.640   | p=0.753<br>(-0.012 ,<br>0.016)<br>0.030<br>3.613   | p=0.192<br>(-0.006 ,<br>0.030)<br>0.051<br>4.872   |
| 13, Calhoun County   | p=0.004<br>(0.007 ,<br>0.039)<br>0.011<br>2.009    | p<0.001<br>(0.040 ,<br>0.090)<br>0.046<br>5.150  | p<0.001<br>(0.076 ,<br>0.132)<br>0.079<br>7.598   | p=0.101<br>(-0.001 ,<br>0.016)<br>0.001<br>0.460     | p<0.001<br>(0.014 ,<br>0.047)<br>0.012<br>2.142    | p<0.001<br>(0.030 ,<br>0.071)<br>0.020<br>2.776    |
| 19, Clinton County   | p=0.045<br>(0.000 ,<br>0.021)<br>0.008<br>0.665    | p<0.001<br>(0.028 ,<br>0.063)<br>0.052<br>2.376  | p<0.001<br>(0.058 ,<br>0.099)<br>0.059<br>2.423   | p=0.645<br>(-0.004 ,<br>0.006)<br>-0.011<br>-7.149   | p=0.032<br>(0.001 ,<br>0.023)<br>0.004<br>0.308    | p=0.005<br>(0.006 ,<br>0.034)<br>-0.013<br>-0.902  |
| 22, Dickinson County | p=0.506<br>(-0.015 ,<br>0.031)<br>-0.018<br>-2.697 | p=0.018<br>(0.009 ,<br>0.095)<br>0.002<br>0.105  | p=0.015<br>(0.011 ,<br>0.107)<br>-0.008<br>-0.426 | p<0.001<br>(-0.014 , -<br>0.008)<br>-0.008<br>-2.288 | p=0.758<br>(-0.021 ,<br>0.029)<br>-0.017<br>-2.036 | p=0.367<br>(-0.042 ,<br>0.016)<br>-0.019<br>-1.669 |
| 23, Eaton County     | p=0.007<br>(-0.031 , -<br>0.005)<br>0.018<br>2.332 | p=0.917<br>(-0.029 ,<br>0.032)<br>0.020<br>1.752 | p=0.670<br>(-0.043 ,<br>0.028)<br>0.020<br>1.568  | p=0.022<br>(-0.014 , -<br>0.001)<br>-0.003<br>-0.936 | p=0.042<br>(-0.033 , -<br>0.001)<br>0.003<br>0.469 | p=0.095<br>(-0.041 ,<br>0.003)<br>-0.001<br>-0.169 |
| 25, Genesee County   | p=0.020<br>(0.003 ,<br>0.034)<br>0.020<br>4.496    | p=0.080<br>(-0.002 ,<br>0.042)<br>0.057<br>8.154 | p=0.117<br>(-0.005 ,<br>0.046)<br>0.076<br>9.360  | p=0.349<br>(-0.009 ,<br>0.003)<br>-0.001<br>-0.692   | p=0.639<br>(-0.011 ,<br>0.017)<br>0.002<br>0.541   | p=0.866<br>(-0.019 ,<br>0.016)<br>-0.001<br>-0.293 |

|                           |                                                    |                                                  |                                                    |                                                    |                                                    |                                                    |
|---------------------------|----------------------------------------------------|--------------------------------------------------|----------------------------------------------------|----------------------------------------------------|----------------------------------------------------|----------------------------------------------------|
| 28, Grand Traverse County | p<0.001<br>(0.011 ,<br>0.029)<br>0.013<br>1.523    | p<0.001<br>(0.043 ,<br>0.071)<br>0.033<br>2.264  | p<0.001<br>(0.060 ,<br>0.091)<br>0.037<br>2.204    | p=0.489<br>(-0.005 ,<br>0.002)<br>-0.009<br>-5.366 | p=0.589<br>(-0.006 ,<br>0.010)<br>-0.016<br>-2.239 | p=0.769<br>(-0.011 ,<br>0.008)<br>-0.021<br>-2.160 |
| 29, Gratiot County        | p=0.128<br>(-0.004 ,<br>0.029)<br>-0.007<br>-0.777 | p=0.024<br>(0.004 ,<br>0.061)<br>0.025<br>1.291  | p=0.027<br>(0.004 ,<br>0.071)<br>0.030<br>1.289    | p<0.001<br>(-0.013 , -<br>0.006)<br>0.002<br>0.303 | p=0.025<br>(-0.029 , -<br>0.002)<br>0.010<br>0.761 | p=0.031<br>(-0.041 , -<br>0.002)<br>0.003<br>0.167 |
| 33, Ingham County         | p=0.437<br>(-0.023 ,<br>0.010)<br>0.033<br>5.390   | p=0.197<br>(-0.013 ,<br>0.063)<br>0.071<br>7.699 | p=0.197<br>(-0.016 ,<br>0.075)<br>0.085<br>8.306   | p=0.762<br>(-0.010 ,<br>0.014)<br>-0.003<br>-1.222 | p=0.447<br>(-0.015 ,<br>0.035)<br>0.009<br>1.557   | p=0.867<br>(-0.027 ,<br>0.032)<br>0.011<br>1.610   |
| 34, Ionia County          | p<0.001<br>(0.021 ,<br>0.046)<br>0.019<br>2.022    | p<0.001<br>(0.053 ,<br>0.089)<br>0.039<br>2.575  | p<0.001<br>(0.065 ,<br>0.105)<br>0.026<br>1.532    | p=0.222<br>(-0.007 ,<br>0.002)<br>0.005<br>0.925   | p=0.119<br>(-0.002 ,<br>0.019)<br>-0.000<br>-0.053 | p=0.107<br>(-0.002 ,<br>0.024)<br>-0.003<br>-0.301 |
| 35, Iosco County          | p=0.043<br>(0.001 ,<br>0.038)<br>0.015<br>1.055    | p=0.010<br>(0.009 ,<br>0.069)<br>0.040<br>1.766  | p=0.126<br>(-0.007 ,<br>0.059)<br>0.033<br>1.326   | p=0.355<br>(-0.006 ,<br>0.015)<br>-0.008<br>-1.692 | p=0.958<br>(-0.017 ,<br>0.016)<br>0.000<br>0.015   | p=0.763<br>(-0.023 ,<br>0.017)<br>-0.013<br>-0.841 |
| 37, Isabella County       | p=0.292<br>(-0.013 ,<br>0.044)<br>0.013<br>1.275   | p=0.077<br>(-0.004 ,<br>0.084)<br>0.004<br>0.296 | p=0.185<br>(-0.016 ,<br>0.081)<br>-0.004<br>-0.233 | p=0.091<br>(-0.017 ,<br>0.001)<br>-0.008<br>-3.102 | p=0.988<br>(-0.026 ,<br>0.026)<br>0.007<br>0.677   | p=0.400<br>(-0.044 ,<br>0.017)<br>-0.003<br>-0.296 |
| 38, Jackson County        | p=0.202<br>(-0.007 ,<br>0.032)<br>0.013<br>2.133   | p=0.767<br>(-0.025 ,<br>0.033)<br>0.042<br>4.131 | p=0.816<br>(-0.037 ,<br>0.029)<br>0.052<br>4.457   | p=0.002<br>(-0.012 , -<br>0.003)<br>0.003<br>0.984 | p=0.499<br>(-0.013 ,<br>0.026)<br>0.016<br>2.472   | p=0.768<br>(-0.026 ,<br>0.019)<br>0.009<br>1.153   |

|                       |                                                    |                                                    |                                                    |                                                      |                                                    |                                                    |
|-----------------------|----------------------------------------------------|----------------------------------------------------|----------------------------------------------------|------------------------------------------------------|----------------------------------------------------|----------------------------------------------------|
| 39, Kalamazoo County  | p=0.033<br>(0.001 ,<br>0.025)<br>0.031<br>5.492    | p<0.001<br>(0.022 ,<br>0.061)<br>0.061<br>7.264    | p<0.001<br>(0.029 ,<br>0.075)<br>0.081<br>8.475    | p=0.325<br>(-0.003 ,<br>0.010)<br>0.006<br>2.240     | p=0.013<br>(0.003 ,<br>0.028)<br>0.017<br>3.286    | p=0.249<br>(-0.006 ,<br>0.024)<br>0.022<br>3.440   |
| 41, Kent County       | p<0.001<br>(0.020 ,<br>0.042)<br>0.020<br>4.668    | p<0.001<br>(0.044 ,<br>0.077)<br>0.046<br>6.789    | p<0.001<br>(0.062 ,<br>0.099)<br>0.063<br>8.033    | p=0.025<br>(0.001 ,<br>0.012)<br>-0.001<br>-0.648    | p<0.001<br>(0.007 ,<br>0.028)<br>0.006<br>1.427    | p<0.001<br>(0.010 ,<br>0.035)<br>0.007<br>1.424    |
| 44, Lapeer County     | p<0.001<br>(0.012 ,<br>0.029)<br>-0.012<br>-1.977  | p<0.001<br>(0.033 ,<br>0.059)<br>-0.019<br>-1.572  | p<0.001<br>(0.047 ,<br>0.078)<br>-0.008<br>-0.573  | p=0.517<br>(-0.005 ,<br>0.003)<br>-0.007<br>-3.265   | p=0.154<br>(-0.002 ,<br>0.014)<br>-0.015<br>-2.177 | p=0.155<br>(-0.003 ,<br>0.018)<br>-0.015<br>-1.576 |
| 46, Lenawee County    | p=0.048<br>(-0.025 , -<br>0.000)<br>0.027<br>2.379 | p=0.116<br>(-0.042 , -<br>0.005)<br>0.054<br>3.012 | p=0.567<br>(-0.037 , -<br>0.020)<br>0.066<br>3.182 | p<0.001<br>(-0.012 , -<br>0.003)<br>-0.003<br>-0.560 | p=0.029<br>(-0.028 , -<br>0.001)<br>0.014<br>1.219 | p=0.115<br>(-0.033 ,<br>0.004)<br>0.007<br>0.515   |
| 47, Livingston County | p=0.017<br>(0.005 ,<br>0.049)<br>0.001<br>0.094    | p=0.003<br>(0.019 ,<br>0.089)<br>-0.019<br>-2.239  | p<0.001<br>(0.025 ,<br>0.106)<br>-0.022<br>-2.113  | p=0.575<br>(-0.012 ,<br>0.007)<br>-0.001<br>-0.357   | p=0.223<br>(-0.008 ,<br>0.036)<br>-0.001<br>-0.169 | p=0.607<br>(-0.020 ,<br>0.034)<br>-0.000<br>-0.001 |
| 50, Macomb County     | p=0.925<br>(-0.010 ,<br>0.011)<br>0.003<br>0.874   | p=0.025<br>(-0.035 , -<br>0.002)<br>0.012<br>2.042 | p=0.035<br>(-0.041 , -<br>0.002)<br>0.019<br>2.890 | p=0.721<br>(-0.007 ,<br>0.005)<br>-0.001<br>-0.822   | p=0.866<br>(-0.013 ,<br>0.011)<br>0.000<br>0.074   | p=0.999<br>(-0.015 ,<br>0.015)<br>0.004<br>0.974   |
| 56, Midland County    | p=0.382<br>(-0.004 ,<br>0.010)<br>0.004<br>0.578   | p=0.041<br>(0.000 ,<br>0.023)<br>0.016<br>1.246    | p=0.004<br>(0.006 ,<br>0.032)<br>0.021<br>1.429    | p=0.411<br>(-0.005 ,<br>0.002)<br>-0.003<br>-0.872   | p=0.941<br>(-0.007 ,<br>0.007)<br>0.014<br>1.554   | p=0.330<br>(-0.004 ,<br>0.013)<br>0.016<br>1.498   |

|                     |                                                    |                                                   |                                                  |                                                    |                                                    |                                                    |
|---------------------|----------------------------------------------------|---------------------------------------------------|--------------------------------------------------|----------------------------------------------------|----------------------------------------------------|----------------------------------------------------|
| 58, Monroe County   | p=0.564<br>(-0.011 ,<br>0.019)<br>0.016<br>2.092   | p=0.213<br>(-0.009 ,<br>0.040)<br>0.025<br>2.081  | p=0.153<br>(-0.008 ,<br>0.050)<br>0.037<br>2.662 | p=0.383<br>(-0.010 ,<br>0.004)<br>0.000<br>0.019   | p=0.120<br>(-0.004 ,<br>0.032)<br>0.003<br>0.436   | p=0.134<br>(-0.005 ,<br>0.038)<br>-0.010<br>-1.119 |
| 59, Montcalm County | p=0.036<br>(0.001 ,<br>0.031)<br>-0.015<br>-2.430  | p=0.037<br>(0.001 ,<br>0.048)<br>-0.004<br>-0.267 | p=0.008<br>(0.010 ,<br>0.065)<br>0.022<br>1.315  | p=0.985<br>(-0.007 ,<br>0.007)<br>-0.005<br>-1.582 | p=0.663<br>(-0.012 ,<br>0.018)<br>-0.004<br>-0.521 | p=0.263<br>(-0.028 ,<br>0.008)<br>-0.003<br>-0.248 |
| 61, Muskegon County | p=0.015<br>(-0.026 , -<br>0.003)<br>0.022<br>4.503 | p=0.790<br>(-0.030 ,<br>0.023)<br>0.064<br>7.817  | p=0.189<br>(-0.011 ,<br>0.055)<br>0.087<br>9.159 | p=0.114<br>(-0.012 ,<br>0.001)<br>0.007<br>2.686   | p=0.602<br>(-0.021 ,<br>0.012)<br>0.021<br>4.007   | p=0.804<br>(-0.024 ,<br>0.019)<br>0.032<br>4.865   |
| 62, Newaygo County  | p<0.001<br>(0.013 ,<br>0.032)<br>-0.003<br>-0.377  | p<0.001<br>(0.048 ,<br>0.080)<br>0.009<br>0.595   | p<0.001<br>(0.068 ,<br>0.105)<br>0.018<br>1.014  | p=0.007<br>(0.002 ,<br>0.012)<br>0.005<br>0.797    | p<0.001<br>(0.011 ,<br>0.032)<br>0.003<br>0.302    | p<0.001<br>(0.019 ,<br>0.045)<br>0.007<br>0.564    |
| 64, Oceana County   | p=0.706<br>(-0.021 ,<br>0.014)<br>0.019<br>1.235   | p=0.552<br>(-0.021 ,<br>0.040)<br>0.019<br>0.849  | p=0.310<br>(-0.017 ,<br>0.053)<br>0.046<br>1.723 | p=0.425<br>(-0.007 ,<br>0.017)<br>-0.002<br>-0.230 | p=0.762<br>(-0.017 ,<br>0.023)<br>-0.010<br>-0.810 | p=0.573<br>(-0.017 ,<br>0.032)<br>-0.013<br>-0.822 |
| 70, Ottawa County   | p=0.217<br>(-0.011 ,<br>0.050)<br>0.006<br>1.061   | p=0.396<br>(-0.025 ,<br>0.064)<br>0.000<br>0.059  | p=0.085<br>(-0.006 ,<br>0.098)<br>0.011<br>1.144 | p=0.818<br>(-0.014 ,<br>0.011)<br>-0.000<br>-0.084 | p=0.418<br>(-0.033 ,<br>0.014)<br>-0.002<br>-0.283 | p=0.411<br>(-0.044 ,<br>0.018)<br>0.002<br>0.324   |
| 73, Saginaw County  | p=0.289<br>(-0.005 ,<br>0.017)<br>0.023<br>3.985   | p=0.953<br>(-0.016 ,<br>0.017)<br>0.055<br>6.215  | p=0.253<br>(-0.008 ,<br>0.030)<br>0.070<br>6.899 | p=0.933<br>(-0.006 ,<br>0.005)<br>-0.003<br>-1.350 | p=0.778<br>(-0.012 ,<br>0.009)<br>0.001<br>0.281   | p=0.746<br>(-0.011 ,<br>0.016)<br>0.011<br>1.686   |



|                                 |                                                    |                                                  |                                                  |                                                    |                                                    |                                                    |
|---------------------------------|----------------------------------------------------|--------------------------------------------------|--------------------------------------------------|----------------------------------------------------|----------------------------------------------------|----------------------------------------------------|
| 77, St. Clair County            | p<0.001<br>(0.012 ,<br>0.034)<br>-0.002<br>-0.477  | p<0.001<br>(0.038 ,<br>0.073)<br>0.009<br>1.040  | p<0.001<br>(0.050 ,<br>0.090)<br>0.013<br>1.326  | p=0.177<br>(-0.007 ,<br>0.001)<br>-0.002<br>-0.808 | p=0.778<br>(-0.009 ,<br>0.012)<br>0.007<br>1.239   | p=0.092<br>(-0.002 ,<br>0.025)<br>0.006<br>0.881   |
| 78, St. Joseph County           | p=0.633<br>(-0.012 ,<br>0.007)<br>-0.003<br>-0.298 | p=0.299<br>(-0.008 ,<br>0.025)<br>0.004<br>0.219 | p=0.185<br>(-0.006 ,<br>0.033)<br>0.016<br>0.829 | p=0.419<br>(-0.007 ,<br>0.003)<br>-0.008<br>-1.980 | p=0.215<br>(-0.004 ,<br>0.018)<br>-0.005<br>-0.517 | p=0.379<br>(-0.008 ,<br>0.020)<br>-0.004<br>-0.325 |
| 81, Washtenaw County            | p=0.766<br>(-0.023 ,<br>0.017)<br>0.003<br>0.583   | p=0.827<br>(-0.030 ,<br>0.037)<br>0.026<br>3.039 | p=0.407<br>(-0.022 ,<br>0.055)<br>0.039<br>3.951 | p=0.048<br>(-0.015 , -<br>0.000)<br>0.004<br>1.250 | p=0.605<br>(-0.025 ,<br>0.015)<br>0.006<br>1.104   | p=0.745<br>(-0.030 ,<br>0.022)<br>0.013<br>1.938   |
| 84, Wayne County , AOI Docket   | p=0.560<br>(-0.007 ,<br>0.013)<br>0.013<br>3.477   | p=0.002<br>(0.009 ,<br>0.043)<br>0.031<br>5.292  | p<0.001<br>(0.020 ,<br>0.058)<br>0.050<br>7.360  | p=0.211<br>(-0.002 ,<br>0.009)<br>0.004<br>2.003   | p=0.269<br>(-0.005 ,<br>0.017)<br>0.012<br>3.172   | p=0.053<br>(-0.000 ,<br>0.027)<br>0.017<br>3.830   |
| 85, Wayne County , Trial Docket | p<0.001<br>(0.006 ,<br>0.020)<br>0.020<br>5.335    | p<0.001<br>(0.020 ,<br>0.043)<br>0.047<br>8.149  | p<0.001<br>(0.037 ,<br>0.064)<br>0.058<br>8.819  | p=0.045<br>(0.000 ,<br>0.007)<br>0.004<br>2.123    | p=0.002<br>(0.004 ,<br>0.019)<br>0.012<br>3.237    | p<0.001<br>(0.009 ,<br>0.026)<br>0.016<br>3.605    |
| Constant                        | p<0.001<br>(0.012 ,<br>0.027)<br>0.015<br>2.272    | p<0.001<br>(0.036 ,<br>0.058)<br>0.034<br>3.387  | p<0.001<br>(0.045 ,<br>0.071)<br>0.074<br>6.384  | p=0.034<br>(0.000 ,<br>0.007)<br>0.005<br>1.433    | p<0.001<br>(0.005 ,<br>0.019)<br>0.019<br>2.940    | p<0.001<br>(0.007 ,<br>0.025)<br>0.022<br>2.776    |
|                                 | p=0.023<br>(0.002 ,<br>0.027)                      | p<0.001<br>(0.014 ,<br>0.054)                    | p<0.001<br>(0.051 ,<br>0.096)                    | p=0.152<br>(-0.002 ,<br>0.011)                     | p=0.003<br>(0.006 ,<br>0.032)                      | p=0.006<br>(0.006 ,<br>0.037)                      |
| Observations                    | 79,337                                             | 79,337                                           | 79,337                                           | 79,341                                             | 79,341                                             | 79,341                                             |

|                                       |                                                      |                                                      |                                                      |                                                      |                                                      |                                                      |
|---------------------------------------|------------------------------------------------------|------------------------------------------------------|------------------------------------------------------|------------------------------------------------------|------------------------------------------------------|------------------------------------------------------|
| Wald Chi2                             | 1690                                                 | 5053                                                 | 7807                                                 | 596.1                                                | 1974                                                 | 3292                                                 |
| Degrees of Freedom                    | 67                                                   | 67                                                   | 67                                                   | 67                                                   | 67                                                   | 67                                                   |
| P-value                               | p<0.001                                              | p<0.001                                              | p<0.001                                              | p<0.001                                              | p<0.001                                              | p<0.001                                              |
| R-squared                             | 0.029                                                | 0.067                                                | 0.086                                                | 0.008                                                | 0.027                                                | 0.043                                                |
| <b>Baseline Violent Offense</b>       |                                                      |                                                      |                                                      |                                                      |                                                      |                                                      |
|                                       | <b>Ever Arrested for Violent Crime</b>               |                                                      |                                                      | <b>Ever Convicted of Violent Crime</b>               |                                                      |                                                      |
|                                       | <b>1 Year</b>                                        | <b>3 Years</b>                                       | <b>5 Years</b>                                       | <b>1 Year</b>                                        | <b>3 Years</b>                                       | <b>5 Years</b>                                       |
| Prison Only                           | -0.081<br>-7.268<br>p<0.001<br>(-0.103 , -<br>0.059) | -0.142<br>-8.417<br>p<0.001<br>(-0.175 , -<br>0.109) | -0.162<br>-8.256<br>p<0.001<br>(-0.201 , -<br>0.124) | -0.022<br>-3.502<br>p<0.001<br>(-0.034 , -<br>0.010) | -0.069<br>-5.778<br>p<0.001<br>(-0.092 , -<br>0.045) | -0.061<br>-4.144<br>p<0.001<br>(-0.090 , -<br>0.032) |
| Prison X Incarceration Length         | -0.000<br>-1.010<br>p=0.313<br>(-0.000 ,<br>0.000)   | -0.001<br>-4.241<br>p<0.001<br>(-0.001 , -<br>0.000) | -0.001<br>-6.018<br>p<0.001<br>(-0.002 , -<br>0.001) | -0.000<br>-0.322<br>p=0.748<br>(-0.000 ,<br>0.000)   | -0.000<br>-2.900<br>p=0.004<br>(-0.001 , -<br>0.000) | -0.001<br>-5.390<br>p<0.001<br>(-0.001 , -<br>0.001) |
| Prison X Incarceration Length Squared | 0.000<br>0.112<br>p=0.911<br>(-0.000 ,<br>0.000)     | 0.000<br>1.804<br>p=0.071<br>(-0.000 ,<br>0.000)     | 0.000<br>2.561<br>p=0.010<br>(0.000 ,<br>0.000)      | 0.000<br>0.127<br>p=0.899<br>(-0.000 ,<br>0.000)     | 0.000<br>0.778<br>p=0.436<br>(-0.000 ,<br>0.000)     | 0.000<br>2.564<br>p=0.010<br>(0.000 ,<br>0.000)      |
| Probation X Probation Length          | -0.000<br>-0.669<br>p=0.503<br>(-0.002 ,<br>0.001)   | 0.001<br>0.679<br>p=0.497<br>(-0.001 ,<br>0.003)     | 0.001<br>0.776<br>p=0.438<br>(-0.002 ,<br>0.004)     | 0.000<br>0.869<br>p=0.385<br>(-0.000 ,<br>0.001)     | 0.001<br>0.925<br>p=0.355<br>(-0.001 ,<br>0.002)     | 0.002<br>1.900<br>p=0.057<br>(-0.000 ,<br>0.004)     |
| Probation X Probation Length Squared  | 0.000<br>0.067<br>p=0.947<br>(-0.000 ,<br>0.000)     | 0.000<br>0.365<br>p=0.715<br>(-0.000 ,<br>0.000)     | 0.000<br>0.025<br>p=0.980<br>(-0.000 ,<br>0.000)     | -0.000<br>-1.193<br>p=0.233<br>(-0.000 ,<br>0.000)   | -0.000<br>-0.353<br>p=0.724<br>(-0.000 ,<br>0.000)   | -0.000<br>-0.823<br>p=0.410<br>(-0.000 ,<br>0.000)   |
| Jail Only                             | -0.651                                               | -0.297                                               | -0.033                                               | -0.290                                               | -0.837                                               | -1.277                                               |

|                                                |             |             |             |             |             |             |
|------------------------------------------------|-------------|-------------|-------------|-------------|-------------|-------------|
|                                                | -1.781      | -0.530      | -0.052      | -1.647      | -2.106      | -2.577      |
|                                                | p=0.075     | p=0.596     | p=0.959     | p=0.100     | p=0.035     | p=0.010     |
|                                                | (-1.367 ,   | (-1.393 ,   | (-1.296 ,   | (-0.636 ,   | (-1.615 , - | (-2.248 , - |
|                                                | 0.065)      | 0.800)      | 1.229)      | 0.055)      | 0.058)      | 0.306)      |
| Jail X Incarceration Length                    | -0.080      | -0.035      | -0.006      | -0.031      | -0.105      | -0.157      |
|                                                | -1.754      | -0.504      | -0.079      | -1.438      | -2.124      | -2.551      |
|                                                | p=0.079     | p=0.614     | p=0.937     | p=0.150     | p=0.034     | p=0.011     |
|                                                | (-0.170 ,   | (-0.173 ,   | (-0.164 ,   | (-0.074 ,   | (-0.202 , - | (-0.278 , - |
|                                                | 0.009)      | 0.102)      | 0.151)      | 0.011)      | 0.008)      | 0.036)      |
| Jail X Incarceration Length Squared            | -0.002      | -0.001      | 0.000       | -0.001      | -0.003      | -0.004      |
|                                                | -1.652      | -0.350      | 0.019       | -1.219      | -2.015      | -2.399      |
|                                                | p=0.099     | p=0.726     | p=0.985     | p=0.223     | p=0.044     | p=0.016     |
|                                                | (-0.005 ,   | (-0.005 ,   | (-0.005 ,   | (-0.002 ,   | (-0.006 , - | (-0.008 , - |
|                                                | 0.000)      | 0.003)      | 0.005)      | 0.000)      | 0.000)      | 0.001)      |
| Jail with Probation Only                       | -0.007      | 0.010       | 0.002       | -0.002      | -0.008      | -0.019      |
|                                                | -0.644      | 0.620       | 0.096       | -0.346      | -0.723      | -1.357      |
|                                                | p=0.519     | p=0.535     | p=0.924     | p=0.730     | p=0.469     | p=0.175     |
|                                                | (-0.028 ,   | (-0.022 ,   | (-0.035 ,   | (-0.014 ,   | (-0.030 ,   | (-0.045 ,   |
|                                                | 0.014)      | 0.042)      | 0.038)      | 0.010)      | 0.014)      | 0.008)      |
| Jail with Probation X Probation Length         | -0.001      | -0.002      | -0.002      | -0.001      | -0.001      | -0.001      |
|                                                | -2.627      | -2.400      | -2.969      | -2.068      | -1.186      | -1.139      |
|                                                | p=0.009     | p=0.016     | p=0.003     | p=0.039     | p=0.236     | p=0.255     |
|                                                | (-0.002 , - | (-0.003 , - | (-0.004 , - | (-0.001 , - | (-0.002 ,   | (-0.002 ,   |
|                                                | 0.000)      | 0.000)      | 0.001)      | 0.000)      | 0.000)      | 0.000)      |
| Jail with Probation X Probation Length Squared | 0.000       | 0.000       | 0.000       | 0.000       | 0.000       | 0.000       |
|                                                | 2.238       | 2.118       | 2.574       | 2.088       | 1.128       | 1.037       |
|                                                | p=0.025     | p=0.034     | p=0.010     | p=0.037     | p=0.259     | p=0.300     |
|                                                | (0.000 ,    | (0.000 ,    | (0.000 ,    | (0.000 ,    | (-0.000 ,   | (-0.000 ,   |
|                                                | 0.000)      | 0.000)      | 0.000)      | 0.000)      | 0.000)      | 0.000)      |
| 0 Prior Felony                                 | -0.001      | -0.012      | -0.023      | -0.002      | -0.010      | -0.012      |
|                                                | -0.271      | -2.230      | -3.797      | -1.288      | -2.729      | -2.820      |
|                                                | p=0.786     | p=0.026     | p<0.001     | p=0.198     | p=0.006     | p=0.005     |
|                                                | (-0.008 ,   | (-0.022 , - | (-0.035 , - | (-0.005 ,   | (-0.017 , - | (-0.021 , - |
|                                                | 0.006)      | 0.001)      | 0.011)      | 0.001)      | 0.003)      | 0.004)      |
| 5-9 Prior Arrests (ref: 0-4)                   | 0.020       | 0.049       | 0.062       | 0.006       | 0.020       | 0.027       |

|                                 |             |             |             |             |             |             |
|---------------------------------|-------------|-------------|-------------|-------------|-------------|-------------|
|                                 | 6.254       | 10.089      | 11.195      | 3.233       | 5.992       | 6.639       |
|                                 | p<0.001     | p<0.001     | p<0.001     | p<0.001     | p<0.001     | p<0.001     |
|                                 | (0.014 ,    | (0.039 ,    | (0.051 ,    | (0.002 ,    | (0.013 ,    | (0.019 ,    |
|                                 | 0.026)      | 0.058)      | 0.073)      | 0.009)      | 0.027)      | 0.035)      |
| 10+ Prior Arrests               | 0.035       | 0.083       | 0.114       | 0.007       | 0.039       | 0.055       |
|                                 | 8.663       | 13.712      | 16.351      | 3.320       | 8.976       | 10.506      |
|                                 | p<0.001     | p<0.001     | p<0.001     | p<0.001     | p<0.001     | p<0.001     |
|                                 | (0.027 ,    | (0.071 ,    | (0.100 ,    | (0.003 ,    | (0.030 ,    | (0.045 ,    |
|                                 | 0.043)      | 0.095)      | 0.127)      | 0.011)      | 0.047)      | 0.066)      |
| Non-White                       | 0.017       | 0.051       | 0.065       | 0.000       | 0.009       | 0.020       |
|                                 | 5.699       | 11.325      | 12.528      | 0.311       | 2.861       | 5.116       |
|                                 | p<0.001     | p<0.001     | p<0.001     | p=0.756     | p=0.004     | p<0.001     |
|                                 | (0.011 ,    | (0.042 ,    | (0.055 ,    | (-0.003 ,   | (0.003 ,    | (0.012 ,    |
|                                 | 0.023)      | 0.060)      | 0.075)      | 0.004)      | 0.015)      | 0.027)      |
| Age at Sentence Demeaned        | -0.001      | -0.003      | -0.005      | -0.000      | -0.002      | -0.003      |
|                                 | -5.491      | -11.784     | -16.071     | -5.015      | -9.943      | -12.596     |
|                                 | p<0.001     | p<0.001     | p<0.001     | p<0.001     | p<0.001     | p<0.001     |
|                                 | (-0.001 , - | (-0.004 , - | (-0.005 , - | (-0.001 , - | (-0.002 , - | (-0.003 , - |
|                                 | 0.001)      | 0.003)      | 0.004)      | 0.000)      | 0.001)      | 0.002)      |
| Age at Sentence Demeaned Square | 0.000       | 0.000       | 0.000       | 0.000       | 0.000       | 0.000       |
|                                 | 2.455       | 3.842       | 4.890       | 3.185       | 5.279       | 6.812       |
|                                 | p=0.014     | p<0.001     | p<0.001     | p<0.001     | p<0.001     | p<0.001     |
|                                 | (0.000 ,    | (0.000 ,    | (0.000 ,    | (0.000 ,    | (0.000 ,    | (0.000 ,    |
|                                 | 0.000)      | 0.000)      | 0.000)      | 0.000)      | 0.000)      | 0.000)      |
| Sex                             | -0.023      | -0.052      | -0.078      | -0.008      | -0.034      | -0.051      |
|                                 | -5.305      | -7.967      | -10.456     | -4.186      | -8.433      | -10.369     |
|                                 | p<0.001     | p<0.001     | p<0.001     | p<0.001     | p<0.001     | p<0.001     |
|                                 | (-0.031 , - | (-0.064 , - | (-0.092 , - | (-0.012 , - | (-0.042 , - | (-0.061 , - |
|                                 | 0.014)      | 0.039)      | 0.063)      | 0.004)      | 0.026)      | 0.042)      |
| GED                             | 0.000       | -0.006      | -0.011      | -0.002      | -0.003      | -0.006      |
|                                 | 0.028       | -1.039      | -1.567      | -0.813      | -0.870      | -1.246      |
|                                 | p=0.978     | p=0.299     | p=0.117     | p=0.416     | p=0.384     | p=0.213     |
|                                 | (-0.007 ,   | (-0.017 ,   | (-0.024 ,   | (-0.005 ,   | (-0.011 ,   | (-0.016 ,   |
|                                 | 0.008)      | 0.005)      | 0.003)      | 0.002)      | 0.004)      | 0.004)      |
| High School                     | -0.009      | -0.023      | -0.034      | -0.002      | -0.009      | -0.013      |

|                                                             |             |             |             |             |             |             |
|-------------------------------------------------------------|-------------|-------------|-------------|-------------|-------------|-------------|
|                                                             | -2.928      | -5.010      | -6.631      | -1.516      | -2.991      | -3.524      |
|                                                             | p=0.003     | p<0.001     | p<0.001     | p=0.129     | p=0.003     | p<0.001     |
|                                                             | (-0.014 , - | (-0.031 , - | (-0.045 , - | (-0.005 ,   | (-0.015 , - | (-0.021 , - |
|                                                             | 0.003)      | 0.014)      | 0.024)      | 0.001)      | 0.003)      | 0.006)      |
| More Than High School                                       | -0.015      | -0.035      | -0.053      | -0.002      | -0.003      | -0.011      |
|                                                             | -3.573      | -5.349      | -6.832      | -0.705      | -0.694      | -2.000      |
|                                                             | p<0.001     | p<0.001     | p<0.001     | p=0.481     | p=0.488     | p=0.046     |
|                                                             | (-0.023 , - | (-0.048 , - | (-0.068 , - | (-0.006 ,   | (-0.012 ,   | (-0.022 , - |
|                                                             | 0.007)      | 0.022)      | 0.038)      | 0.003)      | 0.006)      | 0.000)      |
| proportion quarters employed in 23 quarters before sentence | -0.015      | -0.029      | -0.042      | -0.007      | -0.026      | -0.038      |
|                                                             | -3.734      | -4.546      | -5.731      | -3.643      | -6.354      | -7.410      |
|                                                             | p<0.001     | p<0.001     | p<0.001     | p<0.001     | p<0.001     | p<0.001     |
|                                                             | (-0.023 , - | (-0.041 , - | (-0.056 , - | (-0.011 , - | (-0.034 , - | (-0.048 , - |
|                                                             | 0.007)      | 0.016)      | 0.028)      | 0.003)      | 0.018)      | 0.028)      |
| Not Single                                                  | -0.001      | 0.008       | 0.011       | -0.000      | -0.002      | -0.004      |
|                                                             | -0.400      | 1.678       | 2.063       | -0.081      | -0.667      | -1.049      |
|                                                             | p=0.689     | p=0.093     | p=0.039     | p=0.936     | p=0.505     | p=0.294     |
|                                                             | (-0.007 ,   | (-0.001 ,   | (0.001 ,    | (-0.003 ,   | (-0.008 ,   | (-0.012 ,   |
|                                                             | 0.005)      | 0.017)      | 0.022)      | 0.003)      | 0.004)      | 0.004)      |
| Any Use of Alcohol                                          | 0.001       | 0.015       | 0.030       | 0.004       | 0.008       | 0.020       |
|                                                             | 0.251       | 2.909       | 5.145       | 2.216       | 2.364       | 4.480       |
|                                                             | p=0.802     | p=0.004     | p<0.001     | p=0.027     | p=0.018     | p<0.001     |
|                                                             | (-0.006 ,   | (0.005 ,    | (0.019 ,    | (0.000 ,    | (0.001 ,    | (0.011 ,    |
|                                                             | 0.007)      | 0.025)      | 0.042)      | 0.007)      | 0.015)      | 0.028)      |
| Any Use of Marijuana                                        | 0.003       | 0.008       | 0.016       | 0.001       | 0.004       | 0.014       |
|                                                             | 0.948       | 1.897       | 2.997       | 0.591       | 1.391       | 3.878       |
|                                                             | p=0.343     | p=0.058     | p=0.003     | p=0.555     | p=0.164     | p<0.001     |
|                                                             | (-0.003 ,   | (-0.000 ,   | (0.005 ,    | (-0.002 ,   | (-0.002 ,   | (0.007 ,    |
|                                                             | 0.008)      | 0.017)      | 0.026)      | 0.004)      | 0.010)      | 0.022)      |
| Any Use of Stimulants (Cocaine or Amphetamine)              | 0.004       | 0.020       | 0.033       | 0.003       | 0.019       | 0.035       |
|                                                             | 1.119       | 3.946       | 5.616       | 1.664       | 5.352       | 7.687       |
|                                                             | p=0.263     | p<0.001     | p<0.001     | p=0.096     | p<0.001     | p<0.001     |
|                                                             | (-0.003 ,   | (0.010 ,    | (0.021 ,    | (-0.001 ,   | (0.012 ,    | (0.026 ,    |
|                                                             | 0.010)      | 0.029)      | 0.044)      | 0.006)      | 0.026)      | 0.043)      |

|                              |                     |                     |                       |                     |                     |                     |
|------------------------------|---------------------|---------------------|-----------------------|---------------------|---------------------|---------------------|
| Any Use of Opioids           | -0.007              | -0.010              | -0.007                | 0.001               | 0.002               | 0.009               |
|                              | -1.603              | -1.505              | -0.882                | 0.369               | 0.389               | 1.309               |
|                              | p=0.109             | p=0.132             | p=0.378               | p=0.712             | p=0.697             | p=0.191             |
| Any Use of Other Drugs       | (-0.015 ,<br>0.002) | (-0.024 ,<br>0.003) | (-0.023 ,<br>0.009)   | (-0.004 ,<br>0.006) | (-0.008 ,<br>0.012) | (-0.004 ,<br>0.021) |
|                              | -0.002              | -0.004              | -0.006                | 0.003               | 0.003               | 0.003               |
|                              | -0.600              | -0.717              | -1.033                | 1.490               | 0.771               | 0.606               |
| Corrected Mental Health Flag | p=0.548             | p=0.473             | p=0.302               | p=0.136             | p=0.441             | p=0.544             |
|                              | (-0.008 ,<br>0.004) | (-0.014 ,<br>0.006) | (-0.018 ,<br>0.006)   | (-0.001 ,<br>0.006) | (-0.004 ,<br>0.010) | (-0.006 ,<br>0.012) |
|                              | 0.012               | 0.014               | 0.009                 | 0.003               | 0.005               | 0.007               |
| 2004 Sentence Year           | 3.932               | 3.100               | 1.772                 | 1.570               | 1.486               | 1.724               |
|                              | p<0.001             | p=0.002             | p=0.076               | p=0.116             | p=0.137             | p=0.085             |
|                              | (0.006 ,<br>0.019)  | (0.005 ,<br>0.024)  | (-0.001 ,<br>0.020)   | (-0.001 ,<br>0.006) | (-0.002 ,<br>0.011) | (-0.001 ,<br>0.015) |
| 2005 Sentence Year           | 0.001               | 0.001               | -0.005                | -0.002              | 0.006               | 0.003               |
|                              | 0.371               | 0.133               | -0.837                | -1.059              | 1.710               | 0.752               |
|                              | p=0.710             | p=0.894             | p=0.402               | p=0.290             | p=0.087             | p=0.452             |
| 2006 Sentence Year           | (-0.005 ,<br>0.008) | (-0.009 ,<br>0.011) | (-0.017 ,<br>0.007)   | (-0.005 ,<br>0.002) | (-0.001 ,<br>0.013) | (-0.005 ,<br>0.012) |
|                              | 0.005               | -0.003              | -0.012                | -0.001              | -0.003              | -0.007              |
|                              | 1.359               | -0.552              | -2.023                | -0.455              | -0.921              | -1.661              |
| 3, Allegan County            | p=0.174             | p=0.581             | p=0.043               | p=0.649             | p=0.357             | p=0.097             |
|                              | (-0.002 ,<br>0.011) | (-0.013 ,<br>0.007) | (-0.024 , -<br>0.000) | (-0.004 ,<br>0.003) | (-0.010 ,<br>0.004) | (-0.016 ,<br>0.001) |
|                              | 0.005               | 0.008               | -0.003                | 0.000               | -0.002              | -0.006              |
| 3, Allegan County            | 1.587               | 1.506               | -0.432                | 0.154               | -0.483              | -1.437              |
|                              | p=0.113             | p=0.132             | p=0.666               | p=0.877             | p=0.629             | p=0.151             |
|                              | (-0.001 ,<br>0.012) | (-0.002 ,<br>0.018) | (-0.015 ,<br>0.009)   | (-0.003 ,<br>0.004) | (-0.009 ,<br>0.005) | (-0.015 ,<br>0.002) |
| 3, Allegan County            | 0.002               | 0.012               | 0.036                 | -0.004              | -0.009              | -0.001              |
|                              | 0.207               | 0.700               | 1.779                 | -0.785              | -0.820              | -0.066              |
|                              | p=0.836             | p=0.484             | p=0.075               | p=0.432             | p=0.412             | p=0.947             |
| (-0.018 ,<br>0.023)          | (-0.021 ,<br>0.045) | (-0.004 ,<br>0.077) | (-0.015 ,<br>0.006)   | (-0.032 ,<br>0.013) | (-0.031 ,<br>0.029) |                     |

|                      |                                |                                |                                |                                  |                                |                                |
|----------------------|--------------------------------|--------------------------------|--------------------------------|----------------------------------|--------------------------------|--------------------------------|
| 5, Antrim County     | 0.019                          | 0.031                          | 0.070                          | -0.006                           | 0.004                          | -0.011                         |
|                      | 0.972                          | 1.093                          | 1.804                          | -2.338                           | 0.193                          | -0.488                         |
|                      | p=0.331<br>(-0.019 ,<br>0.056) | p=0.275<br>(-0.025 ,<br>0.086) | p=0.071<br>(-0.006 ,<br>0.145) | p=0.019<br>(-0.011 , -<br>0.001) | p=0.847<br>(-0.033 ,<br>0.041) | p=0.626<br>(-0.057 ,<br>0.034) |
| 9, Bay County        | 0.011                          | 0.047                          | 0.048                          | -0.008                           | 0.011                          | 0.022                          |
|                      | 1.113                          | 2.844                          | 2.511                          | -1.927                           | 0.940                          | 1.467                          |
|                      | p=0.266<br>(-0.009 ,<br>0.032) | p=0.004<br>(0.015 ,<br>0.080)  | p=0.012<br>(0.011 ,<br>0.086)  | p=0.054<br>(-0.015 ,<br>0.000)   | p=0.347<br>(-0.012 ,<br>0.034) | p=0.142<br>(-0.008 ,<br>0.052) |
| 11, Berrien County   | 0.047                          | 0.078                          | 0.114                          | 0.004                            | 0.023                          | 0.030                          |
|                      | 3.777                          | 4.629                          | 5.987                          | 0.713                            | 1.985                          | 2.109                          |
|                      | p<0.001<br>(0.023 ,<br>0.071)  | p<0.001<br>(0.045 ,<br>0.111)  | p<0.001<br>(0.077 ,<br>0.152)  | p=0.476<br>(-0.007 ,<br>0.016)   | p=0.047<br>(0.000 ,<br>0.046)  | p=0.035<br>(0.002 ,<br>0.057)  |
| 13, Calhoun County   | 0.006                          | 0.081                          | 0.096                          | -0.002                           | 0.016                          | 0.009                          |
|                      | 0.708                          | 6.026                          | 6.337                          | -0.582                           | 1.728                          | 0.801                          |
|                      | p=0.479<br>(-0.010 ,<br>0.021) | p<0.001<br>(0.054 ,<br>0.107)  | p<0.001<br>(0.066 ,<br>0.125)  | p=0.561<br>(-0.010 ,<br>0.006)   | p=0.084<br>(-0.002 ,<br>0.034) | p=0.423<br>(-0.013 ,<br>0.030) |
| 19, Clinton County   | 0.004                          | 0.001                          | -0.024                         | -0.002                           | -0.018                         | -0.025                         |
|                      | 0.276                          | 0.034                          | -0.873                         | -0.314                           | -1.219                         | -1.238                         |
|                      | p=0.783<br>(-0.025 ,<br>0.033) | p=0.973<br>(-0.046 ,<br>0.048) | p=0.383<br>(-0.078 ,<br>0.030) | p=0.753<br>(-0.017 ,<br>0.013)   | p=0.223<br>(-0.046 ,<br>0.011) | p=0.216<br>(-0.066 ,<br>0.015) |
| 22, Dickinson County | 0.011                          | 0.050                          | 0.084                          | 0.006                            | -0.005                         | 0.014                          |
|                      | 0.441                          | 1.299                          | 1.877                          | 0.410                            | -0.210                         | 0.422                          |
|                      | p=0.659<br>(-0.036 ,<br>0.057) | p=0.194<br>(-0.025 ,<br>0.125) | p=0.061<br>(-0.004 ,<br>0.171) | p=0.682<br>(-0.023 ,<br>0.036)   | p=0.833<br>(-0.051 ,<br>0.041) | p=0.673<br>(-0.050 ,<br>0.078) |
| 23, Eaton County     | 0.011                          | 0.019                          | 0.021                          | -0.010                           | -0.005                         | -0.002                         |
|                      | 0.858                          | 1.022                          | 0.944                          | -2.439                           | -0.421                         | -0.132                         |
|                      | p=0.391<br>(-0.014 ,<br>0.035) | p=0.307<br>(-0.018 ,<br>0.057) | p=0.345<br>(-0.023 ,<br>0.064) | p=0.015<br>(-0.017 , -<br>0.002) | p=0.674<br>(-0.030 ,<br>0.020) | p=0.895<br>(-0.034 ,<br>0.030) |

|                           |                     |                     |                     |                       |                       |                       |
|---------------------------|---------------------|---------------------|---------------------|-----------------------|-----------------------|-----------------------|
| 25, Genesee County        | 0.004               | 0.016               | 0.038               | -0.006                | -0.014                | -0.027                |
|                           | 0.643               | 1.705               | 3.295               | -1.962                | -2.423                | -3.485                |
|                           | p=0.520             | p=0.088             | p<0.001             | p=0.050               | p=0.015               | p<0.001               |
| 28, Grand Traverse County | (-0.008 ,<br>0.015) | (-0.002 ,<br>0.035) | (0.016 ,<br>0.061)  | (-0.011 , -<br>0.000) | (-0.026 , -<br>0.003) | (-0.043 , -<br>0.012) |
|                           | -0.006              | 0.013               | 0.029               | -0.008                | -0.012                | -0.037                |
|                           | -0.758              | 0.626               | 1.064               | -3.125                | -0.954                | -2.363                |
| 29, Gratiot County        | p=0.449             | p=0.531             | p=0.287             | p=0.002               | p=0.340               | p=0.018               |
|                           | (-0.022 ,<br>0.010) | (-0.028 ,<br>0.054) | (-0.024 ,<br>0.083) | (-0.013 , -<br>0.003) | (-0.035 ,<br>0.012)   | (-0.068 , -<br>0.006) |
|                           | 0.018               | 0.014               | 0.039               | 0.001                 | -0.022                | 0.002                 |
| 33, Ingham County         | 0.890               | 0.541               | 1.097               | 0.049                 | -1.419                | 0.060                 |
|                           | p=0.373             | p=0.588             | p=0.273             | p=0.961               | p=0.156               | p=0.952               |
|                           | (-0.022 ,<br>0.057) | (-0.038 ,<br>0.067) | (-0.031 ,<br>0.110) | (-0.020 ,<br>0.021)   | (-0.052 ,<br>0.008)   | (-0.052 ,<br>0.056)   |
| 34, Ionia County          | 0.052               | 0.078               | 0.102               | 0.010                 | 0.023                 | 0.020                 |
|                           | 5.410               | 6.133               | 7.054               | 1.919                 | 2.451                 | 1.823                 |
|                           | p<0.001             | p<0.001             | p<0.001             | p=0.055               | p=0.014               | p=0.068               |
| 35, Iosco County          | (0.033 ,<br>0.071)  | (0.053 ,<br>0.103)  | (0.073 ,<br>0.130)  | (-0.000 ,<br>0.020)   | (0.005 ,<br>0.041)    | (-0.002 ,<br>0.042)   |
|                           | -0.010              | 0.020               | 0.032               | -0.003                | 0.009                 | 0.015                 |
|                           | -0.795              | 0.821               | 1.130               | -0.456                | 0.503                 | 0.712                 |
| 37, Isabella County       | p=0.426             | p=0.412             | p=0.258             | p=0.648               | p=0.615               | p=0.476               |
|                           | (-0.036 ,<br>0.015) | (-0.027 ,<br>0.066) | (-0.024 ,<br>0.088) | (-0.018 ,<br>0.011)   | (-0.025 ,<br>0.043)   | (-0.027 ,<br>0.057)   |
|                           | -0.009              | 0.022               | 0.003               | -0.009                | -0.042                | -0.057                |
| 37, Isabella County       | -0.542              | 0.634               | 0.077               | -2.906                | -5.056                | -3.058                |
|                           | p=0.588             | p=0.526             | p=0.938             | p=0.004               | p<0.001               | p=0.002               |
|                           | (-0.042 ,<br>0.024) | (-0.046 ,<br>0.089) | (-0.075 ,<br>0.081) | (-0.014 , -<br>0.003) | (-0.058 , -<br>0.026) | (-0.093 , -<br>0.020) |
| 37, Isabella County       | 0.026               | 0.010               | 0.003               | -0.003                | -0.001                | -0.028                |
|                           | 1.375               | 0.420               | 0.110               | -0.333                | -0.047                | -1.351                |
|                           | p=0.169             | p=0.675             | p=0.913             | p=0.739               | p=0.963               | p=0.177               |
|                           | (-0.011 ,<br>0.063) | (-0.038 ,<br>0.059) | (-0.055 ,<br>0.061) | (-0.020 ,<br>0.014)   | (-0.037 ,<br>0.035)   | (-0.068 ,<br>0.012)   |



|                       |                                |                                |                                |                                |                                |                                |
|-----------------------|--------------------------------|--------------------------------|--------------------------------|--------------------------------|--------------------------------|--------------------------------|
| 38, Jackson County    | 0.024                          | 0.071                          | 0.087                          | -0.000                         | -0.002                         | -0.006                         |
|                       | 2.393                          | 4.666                          | 4.983                          | -0.028                         | -0.171                         | -0.464                         |
|                       | p=0.017<br>(0.004 ,<br>0.043)  | p<0.001<br>(0.041 ,<br>0.101)  | p<0.001<br>(0.053 ,<br>0.121)  | p=0.977<br>(-0.010 ,<br>0.009) | p=0.865<br>(-0.021 ,<br>0.017) | p=0.643<br>(-0.030 ,<br>0.019) |
| 39, Kalamazoo County  | 0.037                          | 0.078                          | 0.092                          | 0.008                          | 0.016                          | 0.008                          |
|                       | 3.789                          | 5.470                          | 5.789                          | 1.413                          | 1.566                          | 0.676                          |
|                       | p<0.001<br>(0.018 ,<br>0.056)  | p<0.001<br>(0.050 ,<br>0.105)  | p<0.001<br>(0.061 ,<br>0.123)  | p=0.158<br>(-0.003 ,<br>0.019) | p=0.117<br>(-0.004 ,<br>0.035) | p=0.499<br>(-0.015 ,<br>0.032) |
| 41, Kent County       | 0.027                          | 0.049                          | 0.058                          | -0.003                         | -0.011                         | -0.014                         |
|                       | 4.217                          | 5.229                          | 5.335                          | -1.040                         | -1.848                         | -1.787                         |
|                       | p<0.001<br>(0.014 ,<br>0.039)  | p<0.001<br>(0.031 ,<br>0.067)  | p<0.001<br>(0.037 ,<br>0.080)  | p=0.298<br>(-0.009 ,<br>0.003) | p=0.065<br>(-0.023 ,<br>0.001) | p=0.074<br>(-0.030 ,<br>0.001) |
| 44, Lapeer County     | 0.040                          | 0.068                          | 0.054                          | -0.002                         | -0.002                         | -0.011                         |
|                       | 2.015                          | 2.529                          | 1.831                          | -0.192                         | -0.148                         | -0.566                         |
|                       | p=0.044<br>(0.001 ,<br>0.079)  | p=0.011<br>(0.015 ,<br>0.121)  | p=0.067<br>(-0.004 ,<br>0.112) | p=0.848<br>(-0.018 ,<br>0.015) | p=0.883<br>(-0.034 ,<br>0.029) | p=0.571<br>(-0.049 ,<br>0.027) |
| 46, Lenawee County    | 0.063                          | 0.101                          | 0.136                          | 0.011                          | 0.022                          | 0.028                          |
|                       | 3.816                          | 4.353                          | 5.221                          | 1.371                          | 1.382                          | 1.442                          |
|                       | p<0.001<br>(0.030 ,<br>0.095)  | p<0.001<br>(0.055 ,<br>0.146)  | p<0.001<br>(0.085 ,<br>0.188)  | p=0.171<br>(-0.005 ,<br>0.027) | p=0.167<br>(-0.009 ,<br>0.052) | p=0.149<br>(-0.010 ,<br>0.067) |
| 47, Livingston County | -0.009                         | -0.006                         | -0.018                         | -0.005                         | 0.001                          | 0.009                          |
|                       | -1.291                         | -0.435                         | -1.161                         | -1.218                         | 0.124                          | 0.730                          |
|                       | p=0.197<br>(-0.023 ,<br>0.005) | p=0.664<br>(-0.031 ,<br>0.019) | p=0.246<br>(-0.048 ,<br>0.012) | p=0.223<br>(-0.013 ,<br>0.003) | p=0.901<br>(-0.018 ,<br>0.020) | p=0.466<br>(-0.016 ,<br>0.034) |
| 50, Macomb County     | 0.001                          | 0.015                          | 0.005                          | -0.003                         | -0.000                         | -0.010                         |
|                       | 0.256                          | 1.721                          | 0.456                          | -0.962                         | -0.035                         | -1.243                         |
|                       | p=0.798<br>(-0.009 ,<br>0.012) | p=0.085<br>(-0.002 ,<br>0.032) | p=0.649<br>(-0.015 ,<br>0.024) | p=0.336<br>(-0.009 ,<br>0.003) | p=0.972<br>(-0.012 ,<br>0.012) | p=0.214<br>(-0.025 ,<br>0.006) |

|                     |                                  |                                |                                |                                  |                                |                                |
|---------------------|----------------------------------|--------------------------------|--------------------------------|----------------------------------|--------------------------------|--------------------------------|
| 56, Midland County  | -0.008                           | -0.005                         | 0.014                          | -0.003                           | -0.010                         | -0.017                         |
|                     | -0.786                           | -0.284                         | 0.650                          | -0.442                           | -0.863                         | -1.114                         |
|                     | p=0.432<br>(-0.027 ,<br>0.012)   | p=0.777<br>(-0.037 ,<br>0.028) | p=0.516<br>(-0.028 ,<br>0.055) | p=0.659<br>(-0.015 ,<br>0.009)   | p=0.388<br>(-0.033 ,<br>0.013) | p=0.265<br>(-0.046 ,<br>0.013) |
| 58, Monroe County   | 0.025                            | 0.059                          | 0.059                          | -0.007                           | -0.001                         | -0.006                         |
|                     | 2.056                            | 3.258                          | 2.861                          | -1.786                           | -0.114                         | -0.384                         |
|                     | p=0.040<br>(0.001 ,<br>0.048)    | p<0.001<br>(0.024 ,<br>0.095)  | p=0.004<br>(0.019 ,<br>0.099)  | p=0.074<br>(-0.015 ,<br>0.001)   | p=0.909<br>(-0.026 ,<br>0.023) | p=0.701<br>(-0.039 ,<br>0.026) |
| 59, Montcalm County | 0.011                            | 0.017                          | 0.028                          | -0.002                           | 0.005                          | 0.011                          |
|                     | 0.872                            | 0.961                          | 1.279                          | -0.365                           | 0.351                          | 0.651                          |
|                     | p=0.383<br>(-0.014 ,<br>0.035)   | p=0.337<br>(-0.018 ,<br>0.053) | p=0.201<br>(-0.015 ,<br>0.071) | p=0.715<br>(-0.013 ,<br>0.009)   | p=0.725<br>(-0.021 ,<br>0.031) | p=0.515<br>(-0.022 ,<br>0.044) |
| 61, Muskegon County | 0.012                            | 0.071                          | 0.090                          | -0.001                           | 0.021                          | 0.033                          |
|                     | 1.638                            | 5.940                          | 6.561                          | -0.357                           | 2.540                          | 3.137                          |
|                     | p=0.101<br>(-0.002 ,<br>0.026)   | p<0.001<br>(0.048 ,<br>0.095)  | p<0.001<br>(0.063 ,<br>0.117)  | p=0.721<br>(-0.009 ,<br>0.006)   | p=0.011<br>(0.005 ,<br>0.038)  | p=0.002<br>(0.012 ,<br>0.054)  |
| 62, Newaygo County  | -0.026                           | 0.013                          | -0.001                         | -0.016                           | -0.022                         | -0.025                         |
|                     | -2.518                           | 0.584                          | -0.048                         | -6.421                           | -1.575                         | -1.382                         |
|                     | p=0.012<br>(-0.046 , -<br>0.006) | p=0.559<br>(-0.031 ,<br>0.057) | p=0.961<br>(-0.051 ,<br>0.049) | p<0.001<br>(-0.020 , -<br>0.011) | p=0.115<br>(-0.049 ,<br>0.005) | p=0.167<br>(-0.060 ,<br>0.010) |
| 64, Oceana County   | 0.001                            | 0.028                          | 0.011                          | -0.005                           | 0.004                          | -0.015                         |
|                     | 0.036                            | 0.869                          | 0.282                          | -0.489                           | 0.185                          | -0.582                         |
|                     | p=0.971<br>(-0.036 ,<br>0.038)   | p=0.385<br>(-0.036 ,<br>0.093) | p=0.778<br>(-0.063 ,<br>0.084) | p=0.625<br>(-0.023 ,<br>0.014)   | p=0.853<br>(-0.039 ,<br>0.048) | p=0.560<br>(-0.065 ,<br>0.035) |
| 70, Ottawa County   | 0.005                            | 0.004                          | -0.002                         | 0.000                            | -0.001                         | -0.013                         |
|                     | 0.537                            | 0.267                          | -0.160                         | 0.059                            | -0.148                         | -1.102                         |
|                     | p=0.591<br>(-0.013 ,<br>0.023)   | p=0.789<br>(-0.023 ,<br>0.030) | p=0.873<br>(-0.033 ,<br>0.028) | p=0.953<br>(-0.010 ,<br>0.011)   | p=0.882<br>(-0.021 ,<br>0.018) | p=0.270<br>(-0.036 ,<br>0.010) |

|                                 |                                |                                |                                |                                |                                |                                |
|---------------------------------|--------------------------------|--------------------------------|--------------------------------|--------------------------------|--------------------------------|--------------------------------|
| 73, Saginaw County              | 0.009                          | 0.044                          | 0.047                          | -0.005                         | -0.003                         | -0.000                         |
|                                 | 1.079                          | 3.373                          | 3.148                          | -1.329                         | -0.364                         | -0.025                         |
|                                 | p=0.281<br>(-0.007 ,<br>0.025) | p<0.001<br>(0.018 ,<br>0.069)  | p=0.002<br>(0.018 ,<br>0.076)  | p=0.184<br>(-0.012 ,<br>0.002) | p=0.716<br>(-0.020 ,<br>0.014) | p=0.980<br>(-0.022 ,<br>0.022) |
| 77, St. Clair County            | -0.002                         | -0.009                         | 0.014                          | -0.002                         | 0.003                          | 0.001                          |
|                                 | -0.335                         | -0.800                         | 1.003                          | -0.619                         | 0.364                          | 0.052                          |
|                                 | p=0.738<br>(-0.016 ,<br>0.011) | p=0.424<br>(-0.031 ,<br>0.013) | p=0.316<br>(-0.014 ,<br>0.043) | p=0.536<br>(-0.010 ,<br>0.005) | p=0.716<br>(-0.014 ,<br>0.021) | p=0.958<br>(-0.021 ,<br>0.022) |
| 78, St. Joseph County           | 0.015                          | 0.023                          | 0.028                          | -0.006                         | 0.011                          | -0.009                         |
|                                 | 0.816                          | 0.886                          | 0.969                          | -0.682                         | 0.534                          | -0.398                         |
|                                 | p=0.414<br>(-0.021 ,<br>0.050) | p=0.375<br>(-0.027 ,<br>0.073) | p=0.333<br>(-0.029 ,<br>0.085) | p=0.495<br>(-0.021 ,<br>0.010) | p=0.593<br>(-0.029 ,<br>0.050) | p=0.691<br>(-0.053 ,<br>0.035) |
| 81, Washtenaw County            | 0.011                          | 0.034                          | 0.029                          | 0.008                          | 0.004                          | -0.002                         |
|                                 | 1.410                          | 2.729                          | 2.015                          | 1.616                          | 0.413                          | -0.165                         |
|                                 | p=0.159<br>(-0.004 ,<br>0.027) | p=0.006<br>(0.010 ,<br>0.058)  | p=0.044<br>(0.001 ,<br>0.057)  | p=0.106<br>(-0.002 ,<br>0.018) | p=0.679<br>(-0.013 ,<br>0.021) | p=0.869<br>(-0.023 ,<br>0.020) |
| 84, Wayne County , AOI Docket   | 0.016                          | 0.046                          | 0.052                          | 0.006                          | 0.018                          | 0.016                          |
|                                 | 2.522                          | 4.644                          | 4.596                          | 1.510                          | 2.585                          | 1.925                          |
|                                 | p=0.012<br>(0.004 ,<br>0.029)  | p<0.001<br>(0.026 ,<br>0.065)  | p<0.001<br>(0.030 ,<br>0.074)  | p=0.131<br>(-0.002 ,<br>0.013) | p=0.010<br>(0.004 ,<br>0.032)  | p=0.054<br>(-0.000 ,<br>0.033) |
| 85, Wayne County , Trial Docket | 0.009                          | 0.031                          | 0.033                          | 0.003                          | 0.009                          | 0.003                          |
|                                 | 1.808                          | 4.042                          | 3.720                          | 0.904                          | 1.651                          | 0.501                          |
|                                 | p=0.071<br>(-0.001 ,<br>0.018) | p<0.001<br>(0.016 ,<br>0.045)  | p<0.001<br>(0.016 ,<br>0.051)  | p=0.366<br>(-0.003 ,<br>0.008) | p=0.099<br>(-0.002 ,<br>0.019) | p=0.616<br>(-0.010 ,<br>0.016) |
| Constant                        | 0.053                          | 0.103                          | 0.170                          | 0.019                          | 0.065                          | 0.091                          |
|                                 | 5.088                          | 6.370                          | 9.156                          | 3.107                          | 5.739                          | 6.580                          |
|                                 | p<0.001<br>(0.033 ,<br>0.074)  | p<0.001<br>(0.071 ,<br>0.134)  | p<0.001<br>(0.134 ,<br>0.207)  | p=0.002<br>(0.007 ,<br>0.031)  | p<0.001<br>(0.043 ,<br>0.087)  | p<0.001<br>(0.064 ,<br>0.118)  |

|                    |         |         |         |         |         |         |
|--------------------|---------|---------|---------|---------|---------|---------|
| Observations       | 31,762  | 31,762  | 31,762  | 31,769  | 31,769  | 31,769  |
| Wald Chi2          | 509.9   | 1435    | 2324    | 281.5   | 701.7   | 1240    |
| Degrees of Freedom | 67      | 67      | 67      | 67      | 67      | 67      |
| P-value            | p<0.001 | p<0.001 | p<0.001 | p<0.001 | p<0.001 | p<0.001 |
| R-squared          | 0.044   | 0.096   | 0.119   | 0.009   | 0.035   | 0.047   |

---

Each cell contains unstandardized beta coefficient, z-statistic, p-value from two tailed test, and 95% confidence interval in parentheses.

**Supplementary Table 8.** Full Model Results for Models in Table 2 (Outcomes Measured by Time Since Release)

|                                       | Entire Sample                   |                                  |                                  |                                 |                                  |                                |
|---------------------------------------|---------------------------------|----------------------------------|----------------------------------|---------------------------------|----------------------------------|--------------------------------|
|                                       | Ever Arrested for Violent Crime |                                  |                                  | Ever Convicted of Violent Crime |                                  |                                |
|                                       | 1 Year                          | 3 Years                          | 5 Years                          | 1 Year                          | 3 Years                          | 5 Years                        |
| Prison Only                           | -0.005                          | 0.006                            | 0.012                            | 0.001                           | 0.004                            | 0.017                          |
|                                       | -0.537                          | 0.378                            | 0.606                            | 0.225                           | 0.447                            | 1.414                          |
|                                       | p=0.591<br>(-0.025 ,<br>0.014)  | p=0.706<br>(-0.024 ,<br>0.035)   | p=0.545<br>(-0.028 ,<br>0.053)   | p=0.822<br>(-0.010 ,<br>0.012)  | p=0.655<br>(-0.015 ,<br>0.024)   | p=0.157<br>(-0.007 ,<br>0.040) |
| Prison X Incarceration Length         | -0.001                          | -0.002                           | -0.001                           | -0.000                          | -0.001                           | -0.000                         |
|                                       | -1.012                          | -1.696                           | -0.304                           | -0.744                          | -0.993                           | -0.417                         |
|                                       | p=0.312<br>(-0.002 ,<br>0.001)  | p=0.090<br>(-0.004 ,<br>0.000)   | p=0.761<br>(-0.004 ,<br>0.003)   | p=0.457<br>(-0.001 ,<br>0.000)  | p=0.321<br>(-0.001 ,<br>0.000)   | p=0.676<br>(-0.002 ,<br>0.001) |
| Prison X Incarceration Length Squared | -0.000                          | 0.000                            | 0.000                            | 0.000                           | 0.000                            | -0.000                         |
|                                       | -0.056                          | 0.917                            | 0.045                            | 0.784                           | 0.514                            | -0.161                         |
|                                       | p=0.956<br>(-0.000 ,<br>0.000)  | p=0.359<br>(-0.000 ,<br>0.000)   | p=0.965<br>(-0.000 ,<br>0.000)   | p=0.433<br>(-0.000 ,<br>0.000)  | p=0.607<br>(-0.000 ,<br>0.000)   | p=0.872<br>(-0.000 ,<br>0.000) |
| Probation X Probation Length          | -0.001                          | -0.002                           | -0.002                           | 0.000                           | 0.001                            | 0.001                          |
|                                       | -1.430                          | -3.015                           | -2.111                           | 0.840                           | 1.539                            | 1.650                          |
|                                       | p=0.153<br>(-0.001 ,<br>0.000)  | p=0.003<br>(-0.003 , -<br>0.001) | p=0.035<br>(-0.003 , -<br>0.000) | p=0.401<br>(-0.000 ,<br>0.001)  | p=0.124<br>(-0.000 ,<br>0.002)   | p=0.099<br>(-0.000 ,<br>0.002) |
| Probation X Probation Length Squared  | -0.000                          | 0.000                            | -0.000                           | -0.000                          | -0.000                           | -0.000                         |
|                                       | -0.306                          | 0.050                            | -1.130                           | -1.613                          | -2.204                           | -1.583                         |
|                                       | p=0.760<br>(-0.000 ,<br>0.000)  | p=0.960<br>(-0.000 ,<br>0.000)   | p=0.259<br>(-0.000 ,<br>0.000)   | p=0.107<br>(-0.000 ,<br>0.000)  | p=0.027<br>(-0.000 , -<br>0.000) | p=0.113<br>(-0.000 ,<br>0.000) |
| Jail Only                             | -0.231                          | 0.193                            | 0.134                            | -0.095                          | -0.368                           | -0.306                         |
|                                       | -0.773                          | 0.450                            | 0.273                            | -0.493                          | -1.222                           | -0.855                         |
|                                       | p=0.440                         | p=0.653                          | p=0.785                          | p=0.622                         | p=0.222                          | p=0.393                        |

|                                                |                     |                     |                     |                     |                     |                     |
|------------------------------------------------|---------------------|---------------------|---------------------|---------------------|---------------------|---------------------|
|                                                | (-0.816 ,<br>0.354) | (-0.650 ,<br>1.036) | (-0.826 ,<br>1.093) | (-0.474 ,<br>0.283) | (-0.958 ,<br>0.222) | (-1.007 ,<br>0.396) |
| Jail X Incarceration Length                    | -0.040              | 0.004               | 0.002               | -0.016              | -0.057              | -0.053              |
|                                                | -1.106              | 0.077               | 0.036               | -0.708              | -1.583              | -1.233              |
|                                                | p=0.269             | p=0.939             | p=0.972             | p=0.479             | p=0.113             | p=0.218             |
|                                                | (-0.110 ,<br>0.031) | (-0.097 ,<br>0.105) | (-0.113 ,<br>0.117) | (-0.062 ,<br>0.029) | (-0.128 ,<br>0.014) | (-0.137 ,<br>0.031) |
| Jail X Incarceration Length Squared            | -0.001              | -0.000              | -0.000              | -0.001              | -0.002              | -0.002              |
|                                                | -1.270              | -0.130              | -0.087              | -0.798              | -1.771              | -1.430              |
|                                                | p=0.204             | p=0.897             | p=0.931             | p=0.425             | p=0.077             | p=0.153             |
|                                                | (-0.003 ,<br>0.001) | (-0.003 ,<br>0.003) | (-0.003 ,<br>0.003) | (-0.002 ,<br>0.001) | (-0.004 ,<br>0.000) | (-0.004 ,<br>0.001) |
| Jail with Probation Only                       | 0.000               | 0.008               | -0.006              | 0.002               | -0.000              | 0.001               |
|                                                | 0.001               | 0.820               | -0.502              | 0.573               | -0.010              | 0.100               |
|                                                | p=0.999             | p=0.412             | p=0.616             | p=0.566             | p=0.992             | p=0.921             |
|                                                | (-0.014 ,<br>0.014) | (-0.012 ,<br>0.029) | (-0.029 ,<br>0.017) | (-0.006 ,<br>0.010) | (-0.014 ,<br>0.014) | (-0.015 ,<br>0.017) |
| Jail with Probation X Probation Length         | -0.000              | -0.001              | -0.001              | 0.000               | -0.000              | 0.000               |
|                                                | -1.251              | -1.398              | -1.808              | 0.297               | -0.030              | 0.157               |
|                                                | p=0.211             | p=0.162             | p=0.071             | p=0.767             | p=0.976             | p=0.875             |
|                                                | (-0.001 ,<br>0.000) | (-0.002 ,<br>0.000) | (-0.002 ,<br>0.000) | (-0.000 ,<br>0.000) | (-0.001 ,<br>0.001) | (-0.001 ,<br>0.001) |
| Jail with Probation X Probation Length Squared | 0.000               | 0.000               | 0.000               | -0.000              | 0.000               | -0.000              |
|                                                | 1.386               | 1.161               | 1.309               | -0.161              | 0.302               | -0.218              |
|                                                | p=0.166             | p=0.246             | p=0.191             | p=0.872             | p=0.763             | p=0.827             |
|                                                | (-0.000 ,<br>0.000) |
| 0 Prior Felony                                 | 0.001               | -0.005              | -0.014              | -0.002              | -0.005              | -0.005              |
|                                                | 0.625               | -1.505              | -3.521              | -1.362              | -2.054              | -1.968              |
|                                                | p=0.532             | p=0.132             | p<0.001             | p=0.173             | p=0.040             | p=0.049             |
|                                                | (-0.003 ,<br>0.006) | (-0.012 ,<br>0.002) | (-0.021 ,<br>0.006) | (-0.004 ,<br>0.001) | (-0.009 ,<br>0.000) | (-0.010 ,<br>0.000) |
| 5-9 Prior Arrests (ref: 0-4)                   | 0.025               | 0.056               | 0.070               | 0.006               | 0.022               | 0.030               |
|                                                | 12.232              | 18.675              | 20.514              | 5.759               | 11.367              | 13.089              |
|                                                | p<0.001             | p<0.001             | p<0.001             | p<0.001             | p<0.001             | p<0.001             |

|                                 |                       |                       |                       |                       |                       |                       |
|---------------------------------|-----------------------|-----------------------|-----------------------|-----------------------|-----------------------|-----------------------|
|                                 | (0.021 ,<br>0.029)    | (0.050 ,<br>0.062)    | (0.063 ,<br>0.076)    | (0.004 ,<br>0.008)    | (0.018 ,<br>0.026)    | (0.026 ,<br>0.035)    |
| 10+ Prior Arrests               | 0.045                 | 0.094                 | 0.120                 | 0.014                 | 0.045                 | 0.063                 |
|                                 | 15.020                | 21.299                | 24.124                | 8.867                 | 15.397                | 17.946                |
|                                 | p<0.001               | p<0.001               | p<0.001               | p<0.001               | p<0.001               | p<0.001               |
|                                 | (0.039 ,<br>0.051)    | (0.085 ,<br>0.102)    | (0.110 ,<br>0.130)    | (0.011 ,<br>0.017)    | (0.039 ,<br>0.050)    | (0.056 ,<br>0.069)    |
| Non-White                       | 0.028                 | 0.071                 | 0.084                 | 0.002                 | 0.015                 | 0.025                 |
|                                 | 15.284                | 26.524                | 27.763                | 1.870                 | 8.496                 | 12.054                |
|                                 | p<0.001               | p<0.001               | p<0.001               | p=0.061               | p<0.001               | p<0.001               |
|                                 | (0.024 ,<br>0.032)    | (0.066 ,<br>0.076)    | (0.078 ,<br>0.090)    | (-0.000 ,<br>0.004)   | (0.012 ,<br>0.019)    | (0.021 ,<br>0.030)    |
| Age at Sentence Demeaned        | -0.000                | -0.001                | -0.002                | -0.000                | -0.001                | -0.001                |
|                                 | -4.218                | -8.065                | -8.534                | -4.295                | -7.781                | -9.353                |
|                                 | p<0.001               | p<0.001               | p<0.001               | p<0.001               | p<0.001               | p<0.001               |
|                                 | (-0.001 , -<br>0.000) | (-0.002 , -<br>0.001) | (-0.002 , -<br>0.001) | (-0.000 , -<br>0.000) | (-0.001 , -<br>0.001) | (-0.001 , -<br>0.001) |
| Age at Sentence Demeaned Square | 0.000                 | 0.000                 | 0.000                 | 0.000                 | 0.000                 | 0.000                 |
|                                 | 2.987                 | 5.700                 | 6.132                 | 3.787                 | 6.937                 | 8.140                 |
|                                 | p=0.003               | p<0.001               | p<0.001               | p<0.001               | p<0.001               | p<0.001               |
|                                 | (0.000 ,<br>0.000)    |
| Sex                             | -0.033                | -0.070                | -0.094                | -0.009                | -0.030                | -0.045                |
|                                 | -18.480               | -25.793               | -30.492               | -9.460                | -17.889               | -22.880               |
|                                 | p<0.001               | p<0.001               | p<0.001               | p<0.001               | p<0.001               | p<0.001               |
|                                 | (-0.036 , -<br>0.029) | (-0.075 , -<br>0.064) | (-0.100 , -<br>0.088) | (-0.011 , -<br>0.007) | (-0.033 , -<br>0.026) | (-0.049 , -<br>0.041) |
| GED                             | 0.001                 | -0.005                | -0.010                | 0.001                 | 0.002                 | -0.000                |
|                                 | 0.512                 | -1.309                | -2.262                | 0.717                 | 0.857                 | -0.116                |
|                                 | p=0.609               | p=0.191               | p=0.024               | p=0.473               | p=0.391               | p=0.907               |
|                                 | (-0.004 ,<br>0.007)   | (-0.013 ,<br>0.003)   | (-0.019 , -<br>0.001) | (-0.002 ,<br>0.004)   | (-0.003 ,<br>0.007)   | (-0.006 ,<br>0.006)   |
| High School                     | -0.012                | -0.032                | -0.042                | -0.004                | -0.010                | -0.018                |
|                                 | -6.857                | -11.968               | -14.012               | -4.261                | -5.604                | -8.740                |
|                                 | p<0.001               | p<0.001               | p<0.001               | p<0.001               | p<0.001               | p<0.001               |

|                                                                   |                       |                       |                       |                       |                       |                       |
|-------------------------------------------------------------------|-----------------------|-----------------------|-----------------------|-----------------------|-----------------------|-----------------------|
|                                                                   | (-0.016 , -<br>0.009) | (-0.037 , -<br>0.027) | (-0.048 , -<br>0.037) | (-0.006 , -<br>0.002) | (-0.013 , -<br>0.006) | (-0.022 , -<br>0.014) |
| More Than High School                                             | -0.017                | -0.040                | -0.055                | -0.002                | -0.008                | -0.015                |
|                                                                   | -6.909                | -10.816               | -12.963               | -1.340                | -3.351                | -5.262                |
|                                                                   | p<0.001               | p<0.001               | p<0.001               | p=0.180               | p<0.001               | p<0.001               |
|                                                                   | (-0.022 , -<br>0.012) | (-0.047 , -<br>0.033) | (-0.064 , -<br>0.047) | (-0.005 ,<br>0.001)   | (-0.013 , -<br>0.003) | (-0.021 , -<br>0.009) |
| Proportion of Quarters Employed in 23 quarters<br>Before Sentence | -0.022                | -0.034                | -0.044                | -0.008                | -0.020                | -0.026                |
|                                                                   | -8.973                | -9.290                | -10.359               | -6.518                | -8.940                | -9.664                |
|                                                                   | p<0.001               | p<0.001               | p<0.001               | p<0.001               | p<0.001               | p<0.001               |
|                                                                   | (-0.026 , -<br>0.017) | (-0.041 , -<br>0.027) | (-0.052 , -<br>0.035) | (-0.011 , -<br>0.006) | (-0.025 , -<br>0.016) | (-0.032 , -<br>0.021) |
| Not Single                                                        | 0.004                 | 0.014                 | 0.018                 | 0.001                 | 0.003                 | 0.004                 |
|                                                                   | 2.180                 | 5.143                 | 5.476                 | 0.831                 | 1.437                 | 1.787                 |
|                                                                   | p=0.029               | p<0.001               | p<0.001               | p=0.406               | p=0.151               | p=0.074               |
|                                                                   | (0.000 ,<br>0.008)    | (0.009 ,<br>0.020)    | (0.011 ,<br>0.024)    | (-0.001 ,<br>0.003)   | (-0.001 ,<br>0.006)   | (-0.000 ,<br>0.008)   |
| Any Use of Alcohol                                                | 0.011                 | 0.030                 | 0.040                 | 0.004                 | 0.010                 | 0.022                 |
|                                                                   | 5.358                 | 10.464                | 12.247                | 3.816                 | 5.161                 | 9.420                 |
|                                                                   | p<0.001               | p<0.001               | p<0.001               | p<0.001               | p<0.001               | p<0.001               |
|                                                                   | (0.007 ,<br>0.014)    | (0.025 ,<br>0.036)    | (0.034 ,<br>0.047)    | (0.002 ,<br>0.006)    | (0.006 ,<br>0.014)    | (0.017 ,<br>0.026)    |
| Any Use of Marijuana                                              | 0.002                 | 0.008                 | 0.016                 | 0.001                 | 0.006                 | 0.013                 |
|                                                                   | 0.993                 | 3.156                 | 5.418                 | 1.470                 | 3.422                 | 6.347                 |
|                                                                   | p=0.321               | p=0.002               | p<0.001               | p=0.141               | p<0.001               | p<0.001               |
|                                                                   | (-0.002 ,<br>0.005)   | (0.003 ,<br>0.013)    | (0.010 ,<br>0.022)    | (-0.000 ,<br>0.003)   | (0.002 ,<br>0.009)    | (0.009 ,<br>0.017)    |
| Any Use of Stimulants (Cocaine or Amphetamine)                    | 0.006                 | 0.016                 | 0.022                 | 0.005                 | 0.018                 | 0.028                 |
|                                                                   | 3.037                 | 5.635                 | 7.055                 | 4.281                 | 9.747                 | 12.673                |
|                                                                   | p=0.002               | p<0.001               | p<0.001               | p<0.001               | p<0.001               | p<0.001               |
|                                                                   | (0.002 ,<br>0.009)    | (0.010 ,<br>0.021)    | (0.016 ,<br>0.029)    | (0.002 ,<br>0.007)    | (0.015 ,<br>0.022)    | (0.024 ,<br>0.033)    |
| Any Use of Opioids                                                | -0.004                | -0.010                | -0.014                | 0.003                 | 0.005                 | 0.011                 |
|                                                                   | -1.603                | -2.850                | -3.380                | 1.796                 | 2.088                 | 3.596                 |



|                              |                                                      |                                                      |                                                      |                                                    |                                                      |                                                       |
|------------------------------|------------------------------------------------------|------------------------------------------------------|------------------------------------------------------|----------------------------------------------------|------------------------------------------------------|-------------------------------------------------------|
| Any Use of Other Drugs       | p=0.109<br>(-0.009 ,<br>0.001)<br>0.001<br>0.250     | p=0.004<br>(-0.017 , -<br>0.003)<br>-0.001<br>-0.198 | p<0.001<br>(-0.022 , -<br>0.006)<br>-0.005<br>-1.551 | p=0.072<br>(-0.000 ,<br>0.006)<br>0.001<br>0.872   | p=0.037<br>(0.000 ,<br>0.011)<br>0.002<br>1.116      | p<0.001<br>(0.005 ,<br>0.018)<br>0.002<br>0.763       |
| Corrected Mental Health Flag | p=0.803<br>(-0.004 ,<br>0.005)<br>0.014<br>6.906     | p=0.843<br>(-0.007 ,<br>0.005)<br>0.024<br>8.122     | p=0.121<br>(-0.012 ,<br>0.001)<br>0.027<br>8.193     | p=0.383<br>(-0.001 ,<br>0.003)<br>0.002<br>2.007   | p=0.264<br>(-0.002 ,<br>0.006)<br>0.010<br>4.917     | p=0.446<br>(-0.003 ,<br>0.007)<br>0.015<br>6.149      |
| 2004 Sentence Year           | p<0.001<br>(0.010 ,<br>0.018)<br>-0.003<br>-1.383    | p<0.001<br>(0.018 ,<br>0.030)<br>-0.005<br>-1.730    | p<0.001<br>(0.021 ,<br>0.034)<br>-0.010<br>-2.801    | p=0.045<br>(0.000 ,<br>0.005)<br>0.001<br>0.579    | p<0.001<br>(0.006 ,<br>0.014)<br>-0.004<br>-1.882    | p<0.001<br>(0.010 ,<br>0.019)<br>-0.010<br>-4.206     |
| 2005 Sentence Year           | p=0.167<br>(-0.007 ,<br>0.001)<br>-0.008<br>-3.735   | p=0.084<br>(-0.011 ,<br>0.001)<br>-0.022<br>-6.815   | p=0.005<br>(-0.017 , -<br>0.003)<br>-0.028<br>-7.542 | p=0.563<br>(-0.002 ,<br>0.003)<br>-0.002<br>-1.919 | p=0.060<br>(-0.008 ,<br>0.000)<br>-0.013<br>-6.443   | p<0.001<br>(-0.015 , -<br>0.006)<br>-0.023<br>-8.985  |
| 2006 Sentence Year           | p<0.001<br>(-0.012 , -<br>0.004)<br>-0.009<br>-4.136 | p<0.001<br>(-0.028 , -<br>0.016)<br>-0.028<br>-8.275 | p<0.001<br>(-0.036 , -<br>0.021)<br>-0.033<br>-8.230 | p=0.055<br>(-0.005 ,<br>0.000)<br>-0.002<br>-1.854 | p<0.001<br>(-0.017 , -<br>0.009)<br>-0.018<br>-8.569 | p<0.001<br>(-0.028 , -<br>0.018)<br>-0.031<br>-11.772 |
| 3, Allegan County            | p<0.001<br>(-0.014 , -<br>0.005)<br>-0.004<br>-0.559 | p<0.001<br>(-0.034 , -<br>0.021)<br>-0.007<br>-0.665 | p<0.001<br>(-0.041 , -<br>0.025)<br>-0.014<br>-1.129 | p=0.064<br>(-0.005 ,<br>0.000)<br>-0.005<br>-1.406 | p<0.001<br>(-0.022 , -<br>0.014)<br>-0.014<br>-1.929 | p<0.001<br>(-0.036 , -<br>0.025)<br>-0.021<br>-2.445  |
| 5, Antrim County             | p=0.576<br>(-0.018 ,<br>0.010)<br>0.013<br>0.882     | p=0.506<br>(-0.028 ,<br>0.014)<br>0.024<br>1.009     | p=0.259<br>(-0.039 ,<br>0.011)<br>0.024<br>0.869     | p=0.160<br>(-0.013 ,<br>0.002)<br>-0.000<br>-0.076 | p=0.054<br>(-0.028 ,<br>0.000)<br>0.003<br>0.208     | p=0.015<br>(-0.038 , -<br>0.004)<br>0.002<br>0.146    |

|                      |                                                    |                                                    |                                                    |                                                    |                                                    |                                                    |
|----------------------|----------------------------------------------------|----------------------------------------------------|----------------------------------------------------|----------------------------------------------------|----------------------------------------------------|----------------------------------------------------|
| 9, Bay County        | p=0.378<br>(-0.016 ,<br>0.041)<br>-0.001<br>-0.177 | p=0.313<br>(-0.023 ,<br>0.072)<br>-0.003<br>-0.319 | p=0.385<br>(-0.030 ,<br>0.079)<br>-0.009<br>-0.728 | p=0.939<br>(-0.010 ,<br>0.009)<br>-0.003<br>-0.844 | p=0.835<br>(-0.025 ,<br>0.031)<br>-0.009<br>-1.151 | p=0.884<br>(-0.029 ,<br>0.033)<br>-0.015<br>-1.686 |
| 11, Berrien County   | p=0.860<br>(-0.015 ,<br>0.013)<br>-0.003<br>-0.395 | p=0.750<br>(-0.024 ,<br>0.017)<br>-0.004<br>-0.347 | p=0.467<br>(-0.032 ,<br>0.015)<br>-0.004<br>-0.345 | p=0.399<br>(-0.010 ,<br>0.004)<br>-0.002<br>-0.357 | p=0.250<br>(-0.023 ,<br>0.006)<br>-0.003<br>-0.428 | p=0.092<br>(-0.033 ,<br>0.002)<br>-0.004<br>-0.473 |
| 13, Calhoun County   | p=0.693<br>(-0.019 ,<br>0.013)<br>-0.008<br>-1.349 | p=0.729<br>(-0.026 ,<br>0.018)<br>-0.011<br>-1.261 | p=0.730<br>(-0.029 ,<br>0.020)<br>-0.016<br>-1.680 | p=0.721<br>(-0.011 ,<br>0.008)<br>-0.004<br>-1.295 | p=0.669<br>(-0.019 ,<br>0.012)<br>-0.012<br>-2.166 | p=0.636<br>(-0.023 ,<br>0.014)<br>-0.017<br>-2.610 |
| 19, Clinton County   | p=0.177<br>(-0.019 ,<br>0.004)<br>-0.007<br>-0.639 | p=0.207<br>(-0.027 ,<br>0.006)<br>-0.014<br>-0.702 | p=0.093<br>(-0.035 ,<br>0.003)<br>-0.018<br>-0.793 | p=0.195<br>(-0.011 ,<br>0.002)<br>-0.008<br>-1.058 | p=0.030<br>(-0.023 ,<br>0.001)<br>-0.018<br>-1.534 | p=0.009<br>(-0.030 ,<br>0.004)<br>-0.025<br>-1.801 |
| 22, Dickinson County | p=0.523<br>(-0.030 ,<br>0.015)<br>0.004<br>0.378   | p=0.483<br>(-0.052 ,<br>0.025)<br>0.014<br>0.867   | p=0.428<br>(-0.061 ,<br>0.026)<br>0.019<br>1.023   | p=0.290<br>(-0.022 ,<br>0.006)<br>-0.003<br>-0.441 | p=0.125<br>(-0.042 ,<br>0.005)<br>-0.003<br>-0.303 | p=0.072<br>(-0.053 ,<br>0.002)<br>-0.002<br>-0.195 |
| 23, Eaton County     | p=0.706<br>(-0.015 ,<br>0.022)<br>0.003<br>0.374   | p=0.386<br>(-0.018 ,<br>0.046)<br>0.007<br>0.673   | p=0.306<br>(-0.017 ,<br>0.055)<br>0.010<br>0.847   | p=0.659<br>(-0.015 ,<br>0.010)<br>-0.003<br>-0.706 | p=0.762<br>(-0.022 ,<br>0.016)<br>-0.004<br>-0.549 | p=0.845<br>(-0.027 ,<br>0.022)<br>-0.005<br>-0.586 |
| 25, Genesee County   | p=0.709<br>(-0.012 ,<br>0.018)<br>0.000<br>0.053   | p=0.501<br>(-0.014 ,<br>0.028)<br>-0.003<br>-0.409 | p=0.397<br>(-0.014 ,<br>0.034)<br>-0.010<br>-1.378 | p=0.480<br>(-0.010 ,<br>0.005)<br>-0.001<br>-0.262 | p=0.583<br>(-0.018 ,<br>0.010)<br>-0.005<br>-1.176 | p=0.558<br>(-0.022 ,<br>0.012)<br>-0.010<br>-2.079 |

|                           |                                                    |                                                    |                                                    |                                                    |                                                    |                                                      |
|---------------------------|----------------------------------------------------|----------------------------------------------------|----------------------------------------------------|----------------------------------------------------|----------------------------------------------------|------------------------------------------------------|
| 28, Grand Traverse County | p=0.958<br>(-0.008 ,<br>0.009)<br>0.006<br>0.558   | p=0.682<br>(-0.016 ,<br>0.010)<br>0.006<br>0.458   | p=0.168<br>(-0.025 ,<br>0.004)<br>0.007<br>0.415   | p=0.794<br>(-0.005 ,<br>0.004)<br>-0.003<br>-1.150 | p=0.240<br>(-0.013 ,<br>0.003)<br>-0.007<br>-0.918 | p=0.038<br>(-0.020 , -<br>0.001)<br>-0.014<br>-1.423 |
| 29, Gratiot County        | p=0.577<br>(-0.014 ,<br>0.025)<br>-0.004<br>-0.270 | p=0.647<br>(-0.021 ,<br>0.034)<br>-0.004<br>-0.207 | p=0.678<br>(-0.025 ,<br>0.039)<br>-0.004<br>-0.169 | p=0.250<br>(-0.009 ,<br>0.002)<br>-0.005<br>-0.547 | p=0.359<br>(-0.022 ,<br>0.008)<br>-0.012<br>-0.850 | p=0.155<br>(-0.033 ,<br>0.005)<br>-0.016<br>-0.959   |
| 33, Ingham County         | p=0.788<br>(-0.031 ,<br>0.024)<br>-0.011<br>-1.818 | p=0.836<br>(-0.046 ,<br>0.037)<br>-0.023<br>-2.804 | p=0.866<br>(-0.053 ,<br>0.044)<br>-0.029<br>-3.106 | p=0.585<br>(-0.024 ,<br>0.014)<br>-0.005<br>-1.758 | p=0.395<br>(-0.040 ,<br>0.016)<br>-0.014<br>-2.635 | p=0.338<br>(-0.048 ,<br>0.016)<br>-0.021<br>-3.210   |
| 34, Ionia County          | p=0.069<br>(-0.022 ,<br>0.001)<br>0.008<br>0.767   | p=0.005<br>(-0.040 , -<br>0.007)<br>0.023<br>1.621 | p=0.002<br>(-0.047 , -<br>0.011)<br>0.029<br>1.747 | p=0.079<br>(-0.012 ,<br>0.001)<br>0.000<br>0.063   | p=0.008<br>(-0.025 , -<br>0.004)<br>0.005<br>0.497 | p<0.001<br>(-0.033 , -<br>0.008)<br>0.010<br>0.902   |
| 35, Iosco County          | p=0.443<br>(-0.012 ,<br>0.027)<br>0.000<br>0.037   | p=0.105<br>(-0.005 ,<br>0.051)<br>0.004<br>0.179   | p=0.081<br>(-0.004 ,<br>0.062)<br>0.006<br>0.261   | p=0.950<br>(-0.011 ,<br>0.012)<br>-0.005<br>-0.865 | p=0.619<br>(-0.013 ,<br>0.023)<br>-0.009<br>-0.692 | p=0.367<br>(-0.012 ,<br>0.032)<br>-0.011<br>-0.795   |
| 37, Isabella County       | p=0.971<br>(-0.024 ,<br>0.025)<br>0.003<br>0.317   | p=0.858<br>(-0.036 ,<br>0.044)<br>0.003<br>0.212   | p=0.794<br>(-0.040 ,<br>0.052)<br>0.004<br>0.262   | p=0.387<br>(-0.018 ,<br>0.007)<br>-0.002<br>-0.441 | p=0.489<br>(-0.034 ,<br>0.016)<br>-0.005<br>-0.517 | p=0.427<br>(-0.038 ,<br>0.016)<br>-0.007<br>-0.656   |
| 38, Jackson County        | p=0.751<br>(-0.016 ,<br>0.022)<br>-0.004<br>-0.614 | p=0.832<br>(-0.025 ,<br>0.030)<br>-0.003<br>-0.264 | p=0.793<br>(-0.026 ,<br>0.034)<br>-0.002<br>-0.220 | p=0.659<br>(-0.011 ,<br>0.007)<br>-0.004<br>-1.186 | p=0.605<br>(-0.023 ,<br>0.014)<br>-0.011<br>-1.773 | p=0.512<br>(-0.029 ,<br>0.015)<br>-0.017<br>-2.209   |

|                       |                                                    |                                                    |                                                    |                                                    |                                                      |                                                      |
|-----------------------|----------------------------------------------------|----------------------------------------------------|----------------------------------------------------|----------------------------------------------------|------------------------------------------------------|------------------------------------------------------|
| 39, Kalamazoo County  | p=0.539<br>(-0.017 ,<br>0.009)<br>-0.003<br>-0.561 | p=0.792<br>(-0.022 ,<br>0.017)<br>-0.004<br>-0.474 | p=0.826<br>(-0.024 ,<br>0.019)<br>-0.015<br>-1.623 | p=0.235<br>(-0.012 ,<br>0.003)<br>-0.001<br>-0.245 | p=0.076<br>(-0.024 ,<br>0.001)<br>-0.006<br>-1.077   | p=0.027<br>(-0.032 , -<br>0.002)<br>-0.012<br>-1.846 |
| 41, Kent County       | p=0.575<br>(-0.014 ,<br>0.008)<br>-0.010<br>-2.181 | p=0.635<br>(-0.020 ,<br>0.012)<br>-0.019<br>-2.886 | p=0.105<br>(-0.033 ,<br>0.003)<br>-0.029<br>-3.887 | p=0.806<br>(-0.007 ,<br>0.005)<br>-0.004<br>-1.697 | p=0.282<br>(-0.016 ,<br>0.005)<br>-0.014<br>-3.342   | p=0.065<br>(-0.024 ,<br>0.001)<br>-0.022<br>-4.252   |
| 44, Lapeer County     | p=0.029<br>(-0.018 , -<br>0.001)<br>0.002<br>0.270 | p=0.004<br>(-0.031 , -<br>0.006)<br>0.008<br>0.669 | p<0.001<br>(-0.043 , -<br>0.014)<br>0.009<br>0.634 | p=0.090<br>(-0.009 ,<br>0.001)<br>-0.002<br>-0.563 | p<0.001<br>(-0.022 , -<br>0.006)<br>-0.002<br>-0.307 | p<0.001<br>(-0.031 , -<br>0.012)<br>-0.001<br>-0.152 |
| 46, Lenawee County    | p=0.787<br>(-0.014 ,<br>0.019)<br>0.007<br>0.557   | p=0.503<br>(-0.016 ,<br>0.032)<br>0.012<br>0.731   | p=0.526<br>(-0.019 ,<br>0.037)<br>0.015<br>0.762   | p=0.573<br>(-0.011 ,<br>0.006)<br>-0.004<br>-0.672 | p=0.759<br>(-0.018 ,<br>0.013)<br>-0.008<br>-0.729   | p=0.879<br>(-0.020 ,<br>0.017)<br>-0.016<br>-1.201   |
| 47, Livingston County | p=0.578<br>(-0.017 ,<br>0.030)<br>0.007<br>1.250   | p=0.465<br>(-0.021 ,<br>0.046)<br>0.016<br>2.031   | p=0.446<br>(-0.023 ,<br>0.053)<br>0.018<br>1.900   | p=0.502<br>(-0.016 ,<br>0.008)<br>-0.002<br>-0.481 | p=0.466<br>(-0.030 ,<br>0.014)<br>-0.002<br>-0.262   | p=0.230<br>(-0.042 ,<br>0.010)<br>-0.003<br>-0.420   |
| 50, Macomb County     | p=0.211<br>(-0.004 ,<br>0.017)<br>-0.003<br>-0.754 | p=0.042<br>(0.001 ,<br>0.031)<br>-0.002<br>-0.312  | p=0.057<br>(-0.001 ,<br>0.037)<br>-0.008<br>-1.382 | p=0.631<br>(-0.008 ,<br>0.005)<br>-0.002<br>-1.100 | p=0.794<br>(-0.013 ,<br>0.010)<br>-0.007<br>-1.837   | p=0.674<br>(-0.017 ,<br>0.011)<br>-0.010<br>-2.395   |
| 56, Midland County    | p=0.451<br>(-0.010 ,<br>0.004)<br>0.004<br>0.547   | p=0.755<br>(-0.012 ,<br>0.009)<br>0.009<br>0.791   | p=0.167<br>(-0.021 ,<br>0.004)<br>0.009<br>0.694   | p=0.271<br>(-0.006 ,<br>0.002)<br>-0.003<br>-0.563 | p=0.066<br>(-0.014 ,<br>0.000)<br>-0.005<br>-0.557   | p=0.017<br>(-0.019 , -<br>0.002)<br>-0.007<br>-0.778 |

|                     |                                                    |                                                    |                                                    |                                                    |                                                    |                                                    |
|---------------------|----------------------------------------------------|----------------------------------------------------|----------------------------------------------------|----------------------------------------------------|----------------------------------------------------|----------------------------------------------------|
| 58, Monroe County   | p=0.584<br>(-0.011 ,<br>0.019)<br>0.001<br>0.090   | p=0.429<br>(-0.013 ,<br>0.032)<br>0.000<br>0.001   | p=0.487<br>(-0.017 ,<br>0.035)<br>0.001<br>0.081   | p=0.574<br>(-0.012 ,<br>0.007)<br>-0.005<br>-1.202 | p=0.578<br>(-0.021 ,<br>0.012)<br>-0.011<br>-1.501 | p=0.437<br>(-0.026 ,<br>0.011)<br>-0.017<br>-1.892 |
| 59, Montcalm County | p=0.928<br>(-0.014 ,<br>0.016)<br>0.009<br>1.091   | p=0.999<br>(-0.022 ,<br>0.022)<br>0.028<br>2.189   | p=0.935<br>(-0.025 ,<br>0.027)<br>0.039<br>2.514   | p=0.229<br>(-0.014 ,<br>0.003)<br>-0.001<br>-0.153 | p=0.133<br>(-0.026 ,<br>0.003)<br>0.003<br>0.344   | p=0.059<br>(-0.035 ,<br>0.001)<br>0.010<br>0.955   |
| 61, Muskegon County | p=0.275<br>(-0.007 ,<br>0.026)<br>0.000<br>0.008   | p=0.029<br>(0.003 ,<br>0.053)<br>-0.003<br>-0.344  | p=0.012<br>(0.009 ,<br>0.069)<br>-0.003<br>-0.288  | p=0.878<br>(-0.010 ,<br>0.008)<br>-0.001<br>-0.304 | p=0.731<br>(-0.014 ,<br>0.020)<br>-0.003<br>-0.557 | p=0.339<br>(-0.011 ,<br>0.031)<br>-0.003<br>-0.507 |
| 62, Newaygo County  | p=0.994<br>(-0.010 ,<br>0.011)<br>-0.006<br>-0.637 | p=0.731<br>(-0.018 ,<br>0.013)<br>-0.008<br>-0.602 | p=0.773<br>(-0.020 ,<br>0.015)<br>-0.012<br>-0.773 | p=0.761<br>(-0.007 ,<br>0.005)<br>-0.005<br>-0.889 | p=0.577<br>(-0.014 ,<br>0.008)<br>-0.009<br>-0.946 | p=0.612<br>(-0.016 ,<br>0.009)<br>-0.012<br>-1.090 |
| 64, Oceana County   | p=0.524<br>(-0.023 ,<br>0.012)<br>-0.001<br>-0.036 | p=0.547<br>(-0.036 ,<br>0.019)<br>-0.001<br>-0.043 | p=0.440<br>(-0.044 ,<br>0.019)<br>0.001<br>0.059   | p=0.374<br>(-0.015 ,<br>0.006)<br>-0.003<br>-0.470 | p=0.344<br>(-0.027 ,<br>0.009)<br>-0.006<br>-0.456 | p=0.276<br>(-0.034 ,<br>0.010)<br>-0.008<br>-0.495 |
| 70, Ottawa County   | p=0.971<br>(-0.029 ,<br>0.028)<br>0.002<br>0.434   | p=0.966<br>(-0.041 ,<br>0.040)<br>0.011<br>1.355   | p=0.953<br>(-0.045 ,<br>0.047)<br>0.009<br>1.041   | p=0.639<br>(-0.017 ,<br>0.011)<br>-0.001<br>-0.243 | p=0.648<br>(-0.029 ,<br>0.018)<br>-0.001<br>-0.119 | p=0.621<br>(-0.040 ,<br>0.024)<br>0.001<br>0.089   |
| 73, Saginaw County  | p=0.664<br>(-0.008 ,<br>0.013)<br>-0.009<br>-1.470 | p=0.175<br>(-0.005 ,<br>0.026)<br>-0.019<br>-2.252 | p=0.298<br>(-0.008 ,<br>0.027)<br>-0.030<br>-3.118 | p=0.808<br>(-0.007 ,<br>0.005)<br>-0.003<br>-1.131 | p=0.905<br>(-0.011 ,<br>0.010)<br>-0.013<br>-2.332 | p=0.929<br>(-0.012 ,<br>0.013)<br>-0.021<br>-3.127 |

|                                 |                                                      |                                                      |                                                      |                                                    |                                                      |                                                      |
|---------------------------------|------------------------------------------------------|------------------------------------------------------|------------------------------------------------------|----------------------------------------------------|------------------------------------------------------|------------------------------------------------------|
| 77, St. Clair County            | p=0.142<br>(-0.020 ,<br>0.003)<br>-0.000<br>-0.062   | p=0.024<br>(-0.036 , -<br>0.002)<br>-0.000<br>-0.044 | p=0.002<br>(-0.048 , -<br>0.011)<br>-0.002<br>-0.242 | p=0.258<br>(-0.009 ,<br>0.002)<br>-0.003<br>-1.014 | p=0.020<br>(-0.023 , -<br>0.002)<br>-0.007<br>-1.265 | p=0.002<br>(-0.034 , -<br>0.008)<br>-0.011<br>-1.684 |
| 78, St. Joseph County           | p=0.951<br>(-0.010 ,<br>0.010)<br>-0.011<br>-0.962   | p=0.965<br>(-0.016 ,<br>0.015)<br>-0.017<br>-1.075   | p=0.809<br>(-0.020 ,<br>0.016)<br>-0.022<br>-1.175   | p=0.311<br>(-0.010 ,<br>0.003)<br>-0.009<br>-1.235 | p=0.206<br>(-0.018 ,<br>0.004)<br>-0.019<br>-1.730   | p=0.092<br>(-0.024 ,<br>0.002)<br>-0.026<br>-2.095   |
| 81, Washtenaw County            | p=0.336<br>(-0.033 ,<br>0.011)<br>-0.009<br>-1.717   | p=0.282<br>(-0.048 ,<br>0.014)<br>-0.018<br>-2.325   | p=0.240<br>(-0.058 ,<br>0.014)<br>-0.027<br>-3.004   | p=0.217<br>(-0.022 ,<br>0.005)<br>-0.003<br>-0.932 | p=0.084<br>(-0.040 ,<br>0.003)<br>-0.011<br>-2.087   | p=0.036<br>(-0.051 , -<br>0.002)<br>-0.018<br>-2.802 |
| 84, Wayne County , AOI Docket   | p=0.086<br>(-0.020 ,<br>0.001)<br>-0.004<br>-0.938   | p=0.020<br>(-0.034 , -<br>0.003)<br>-0.007<br>-1.163 | p=0.003<br>(-0.045 , -<br>0.009)<br>-0.014<br>-2.107 | p=0.352<br>(-0.010 ,<br>0.003)<br>0.001<br>0.671   | p=0.037<br>(-0.022 , -<br>0.001)<br>0.001<br>0.390   | p=0.005<br>(-0.031 , -<br>0.005)<br>0.001<br>0.292   |
| 85, Wayne County , Trial Docket | p=0.348<br>(-0.011 ,<br>0.004)<br>-0.010<br>-2.758   | p=0.245<br>(-0.018 ,<br>0.005)<br>-0.023<br>-4.364   | p=0.035<br>(-0.027 , -<br>0.001)<br>-0.035<br>-5.592 | p=0.503<br>(-0.003 ,<br>0.006)<br>0.001<br>0.457   | p=0.697<br>(-0.006 ,<br>0.009)<br>-0.003<br>-0.827   | p=0.770<br>(-0.008 ,<br>0.010)<br>-0.006<br>-1.529   |
| Constant                        | p=0.006<br>(-0.017 , -<br>0.003)<br>-0.020<br>-2.894 | p<0.001<br>(-0.034 , -<br>0.013)<br>-0.057<br>-5.705 | p<0.001<br>(-0.047 , -<br>0.023)<br>-0.049<br>-4.292 | p=0.648<br>(-0.003 ,<br>0.005)<br>-0.006<br>-1.538 | p=0.408<br>(-0.010 ,<br>0.004)<br>-0.016<br>-2.253   | p=0.126<br>(-0.015 ,<br>0.002)<br>-0.030<br>-3.697   |
|                                 | p=0.004<br>(-0.033 , -<br>0.006)                     | p<0.001<br>(-0.076 , -<br>0.037)                     | p<0.001<br>(-0.071 , -<br>0.027)                     | p=0.124<br>(-0.014 ,<br>0.002)                     | p=0.024<br>(-0.029 , -<br>0.002)                     | p<0.001<br>(-0.045 , -<br>0.014)                     |
| Observations                    | 106,926                                              | 104,605                                              | 100,445                                              | 108,404                                            | 107,425                                              | 105,799                                              |

|                                       | 2168                                               | 5250                                                 | 7076                                                 | 833.1                                              | 2655                                                 | 4268                                               |
|---------------------------------------|----------------------------------------------------|------------------------------------------------------|------------------------------------------------------|----------------------------------------------------|------------------------------------------------------|----------------------------------------------------|
| Wald Chi2                             | 2168                                               | 5250                                                 | 7076                                                 | 833.1                                              | 2655                                                 | 4268                                               |
| Degrees of Freedom                    | 67                                                 | 67                                                   | 67                                                   | 67                                                 | 67                                                   | 67                                                 |
| P-value                               | p<0.001                                            | p<0.001                                              | p<0.001                                              | p<0.001                                            | p<0.001                                              | p<0.001                                            |
| R-square                              | 0.017                                              | 0.042                                                | 0.056                                                | 0.007                                              | 0.019                                                | 0.035                                              |
|                                       | <b>No Baseline Violent Offense</b>                 |                                                      |                                                      |                                                    |                                                      |                                                    |
|                                       | <b>Ever Arrested for Violent Crime</b>             |                                                      |                                                      | <b>Ever Convicted of Violent Crime</b>             |                                                      |                                                    |
|                                       | <b>1 Year</b>                                      | <b>3 Years</b>                                       | <b>5 Years</b>                                       | <b>1 Year</b>                                      | <b>3 Years</b>                                       | <b>5 Years</b>                                     |
| Prison Only                           | -0.008<br>-0.603<br>p=0.547<br>(-0.033 ,<br>0.018) | -0.003<br>-0.140<br>p=0.888<br>(-0.041 ,<br>0.036)   | 0.036<br>1.339<br>p=0.180<br>(-0.017 ,<br>0.089)     | 0.006<br>0.879<br>p=0.380<br>(-0.007 ,<br>0.019)   | -0.003<br>-0.213<br>p=0.832<br>(-0.026 ,<br>0.021)   | 0.002<br>0.164<br>p=0.870<br>(-0.027 ,<br>0.032)   |
| Prison X Incarceration Length         | -0.001<br>-0.631<br>p=0.528<br>(-0.003 ,<br>0.001) | -0.002<br>-1.363<br>p=0.173<br>(-0.006 ,<br>0.001)   | 0.003<br>1.281<br>p=0.200<br>(-0.002 ,<br>0.008)     | -0.001<br>-1.076<br>p=0.282<br>(-0.002 ,<br>0.001) | -0.002<br>-1.979<br>p=0.048<br>(-0.004 , -<br>0.000) | -0.002<br>-1.658<br>p=0.097<br>(-0.005 ,<br>0.000) |
| Prison X Incarceration Length Squared | 0.000<br>0.777<br>p=0.437<br>(-0.000 ,<br>0.000)   | 0.000<br>2.064<br>p=0.039<br>(0.000 ,<br>0.000)      | 0.000<br>1.249<br>p=0.212<br>(-0.000 ,<br>0.000)     | 0.000<br>0.615<br>p=0.539<br>(-0.000 ,<br>0.000)   | 0.000<br>0.614<br>p=0.539<br>(-0.000 ,<br>0.000)     | 0.000<br>0.548<br>p=0.583<br>(-0.000 ,<br>0.000)   |
| Probation X Probation Length          | -0.000<br>-0.913<br>p=0.361<br>(-0.001 ,<br>0.000) | -0.002<br>-3.050<br>p=0.002<br>(-0.003 , -<br>0.001) | -0.002<br>-2.954<br>p=0.003<br>(-0.003 , -<br>0.001) | -0.000<br>-0.104<br>p=0.917<br>(-0.000 ,<br>0.000) | 0.000<br>0.451<br>p=0.652<br>(-0.001 ,<br>0.001)     | 0.000<br>0.062<br>p=0.951<br>(-0.001 ,<br>0.001)   |
| Probation X Probation Length Squared  | -0.000<br>-0.681<br>p=0.496<br>(-0.000 ,<br>0.000) | 0.000<br>1.267<br>p=0.205<br>(-0.000 ,<br>0.000)     | 0.000<br>0.475<br>p=0.635<br>(-0.000 ,<br>0.000)     | -0.000<br>-0.522<br>p=0.602<br>(-0.000 ,<br>0.000) | -0.000<br>-1.328<br>p=0.184<br>(-0.000 ,<br>0.000)   | -0.000<br>-0.919<br>p=0.358<br>(-0.000 ,<br>0.000) |
| Jail Only                             | -0.012                                             | 0.251                                                | -0.133                                               | 0.245                                              | 0.027                                                | 0.151                                              |

|                                                |           |           |             |           |           |           |
|------------------------------------------------|-----------|-----------|-------------|-----------|-----------|-----------|
|                                                | -0.040    | 0.584     | -0.274      | 1.202     | 0.091     | 0.419     |
|                                                | p=0.968   | p=0.559   | p=0.784     | p=0.229   | p=0.927   | p=0.675   |
|                                                | (-0.577 , | (-0.592 , | (-1.084 ,   | (-0.155 , | (-0.543 , | (-0.554 , |
|                                                | 0.554)    | 1.094)    | 0.818)      | 0.645)    | 0.596)    | 0.856)    |
| Jail X Incarceration Length                    | -0.008    | 0.017     | -0.023      | 0.026     | -0.007    | 0.004     |
|                                                | -0.220    | 0.341     | -0.395      | 1.069     | -0.212    | 0.084     |
|                                                | p=0.826   | p=0.733   | p=0.693     | p=0.285   | p=0.832   | p=0.933   |
|                                                | (-0.075 , | (-0.083 , | (-0.136 ,   | (-0.022 , | (-0.075 , | (-0.080 , |
|                                                | 0.060)    | 0.118)    | 0.091)      | 0.073)    | 0.060)    | 0.087)    |
| Jail X Incarceration Length Squared            | -0.000    | 0.000     | -0.001      | 0.001     | -0.000    | -0.000    |
|                                                | -0.300    | 0.210     | -0.437      | 0.998     | -0.419    | -0.145    |
|                                                | p=0.764   | p=0.833   | p=0.662     | p=0.318   | p=0.675   | p=0.884   |
|                                                | (-0.002 , | (-0.003 , | (-0.004 ,   | (-0.001 , | (-0.002 , | (-0.003 , |
|                                                | 0.002)    | 0.003)    | 0.003)      | 0.002)    | 0.002)    | 0.002)    |
| Jail with Probation Only                       | -0.002    | 0.016     | 0.012       | 0.003     | 0.002     | 0.006     |
|                                                | -0.335    | 1.502     | 0.973       | 0.761     | 0.321     | 0.749     |
|                                                | p=0.737   | p=0.133   | p=0.331     | p=0.447   | p=0.748   | p=0.454   |
|                                                | (-0.017 , | (-0.005 , | (-0.012 ,   | (-0.005 , | (-0.012 , | (-0.010 , |
|                                                | 0.012)    | 0.038)    | 0.036)      | 0.011)    | 0.016)    | 0.023)    |
| Jail with Probation X Probation Length         | -0.000    | -0.001    | -0.000      | 0.000     | -0.000    | 0.000     |
|                                                | -0.550    | -1.209    | -0.600      | 1.587     | -0.370    | 0.949     |
|                                                | p=0.583   | p=0.227   | p=0.549     | p=0.112   | p=0.711   | p=0.343   |
|                                                | (-0.001 , | (-0.002 , | (-0.002 ,   | (-0.000 , | (-0.001 , | (-0.000 , |
|                                                | 0.001)    | 0.000)    | 0.001)      | 0.001)    | 0.001)    | 0.001)    |
| Jail with Probation X Probation Length Squared | 0.000     | 0.000     | 0.000       | -0.000    | -0.000    | -0.000    |
|                                                | 0.733     | 0.638     | 0.420       | -1.396    | -0.546    | -1.103    |
|                                                | p=0.464   | p=0.524   | p=0.675     | p=0.163   | p=0.585   | p=0.270   |
|                                                | (-0.000 , | (-0.000 , | (-0.000 ,   | (-0.000 , | (-0.000 , | (-0.000 , |
|                                                | 0.000)    | 0.000)    | 0.000)      | 0.000)    | 0.000)    | 0.000)    |
| 0 Prior Felony                                 | 0.001     | -0.006    | -0.012      | -0.001    | -0.004    | -0.005    |
|                                                | 0.565     | -1.475    | -2.892      | -0.737    | -1.793    | -1.859    |
|                                                | p=0.572   | p=0.140   | p=0.004     | p=0.461   | p=0.073   | p=0.063   |
|                                                | (-0.004 , | (-0.013 , | (-0.021 , - | (-0.004 , | (-0.009 , | (-0.011 , |
|                                                | 0.007)    | 0.002)    | 0.004)      | 0.002)    | 0.000)    | 0.000)    |
|                                                | 0.023     | 0.053     | 0.066       | 0.005     | 0.021     | 0.029     |



|                                 |                                                      |                                                       |                                                       |                                                     |                                                      |                                                      |
|---------------------------------|------------------------------------------------------|-------------------------------------------------------|-------------------------------------------------------|-----------------------------------------------------|------------------------------------------------------|------------------------------------------------------|
| 5-9 Prior Arrests (ref: 0-4)    | 10.227<br>p<0.001<br>(0.019 ,<br>0.028)<br>0.039     | 15.663<br>p<0.001<br>(0.046 ,<br>0.059)<br>0.083      | 17.332<br>p<0.001<br>(0.058 ,<br>0.073)<br>0.109      | 4.396<br>p<0.001<br>(0.003 ,<br>0.007)<br>0.011     | 9.924<br>p<0.001<br>(0.017 ,<br>0.025)<br>0.040      | 11.315<br>p<0.001<br>(0.024 ,<br>0.034)<br>0.056     |
| 10+ Prior Arrests               | 11.328<br>p<0.001<br>(0.032 ,<br>0.046)<br>0.027     | 16.676<br>p<0.001<br>(0.073 ,<br>0.093)<br>0.069      | 19.542<br>p<0.001<br>(0.098 ,<br>0.120)<br>0.085      | 6.540<br>p<0.001<br>(0.008 ,<br>0.015)<br>0.003     | 12.282<br>p<0.001<br>(0.033 ,<br>0.046)<br>0.015     | 14.342<br>p<0.001<br>(0.048 ,<br>0.063)<br>0.025     |
| Non-White                       | 13.447<br>p<0.001<br>(0.023 ,<br>0.031)<br>-0.000    | 23.002<br>p<0.001<br>(0.063 ,<br>0.075)<br>-0.001     | 25.003<br>p<0.001<br>(0.078 ,<br>0.092)<br>-0.002     | 2.684<br>p=0.007<br>(0.001 ,<br>0.005)<br>-0.000    | 7.984<br>p<0.001<br>(0.012 ,<br>0.019)<br>-0.001     | 10.820<br>p<0.001<br>(0.020 ,<br>0.029)<br>-0.001    |
| Age at Sentence Demeaned        | -3.364<br>p<0.001<br>(-0.001 , -<br>0.000)<br>0.000  | -8.062<br>p<0.001<br>(-0.002 , -<br>0.001)<br>0.000   | -8.652<br>p<0.001<br>(-0.002 , -<br>0.001)<br>0.000   | -2.726<br>p=0.006<br>(-0.000 , -<br>0.000)<br>0.000 | -6.500<br>p<0.001<br>(-0.001 , -<br>0.001)<br>0.000  | -7.856<br>p<0.001<br>(-0.001 , -<br>0.001)<br>0.000  |
| Age at Sentence Demeaned Square | 1.793<br>p=0.073<br>(-0.000 ,<br>0.000)<br>-0.031    | 4.689<br>p<0.001<br>(0.000 ,<br>0.000)<br>-0.068      | 5.147<br>p<0.001<br>(0.000 ,<br>0.000)<br>-0.090      | 1.415<br>p=0.157<br>(-0.000 ,<br>0.000)<br>-0.007   | 4.305<br>p<0.001<br>(0.000 ,<br>0.000)<br>-0.028     | 5.339<br>p<0.001<br>(0.000 ,<br>0.000)<br>-0.041     |
| Sex                             | -17.544<br>p<0.001<br>(-0.035 , -<br>0.028)<br>0.001 | -24.524<br>p<0.001<br>(-0.073 , -<br>0.062)<br>-0.005 | -27.954<br>p<0.001<br>(-0.096 , -<br>0.084)<br>-0.010 | -7.981<br>p<0.001<br>(-0.009 , -<br>0.005)<br>0.002 | -16.988<br>p<0.001<br>(-0.031 , -<br>0.024)<br>0.002 | -20.763<br>p<0.001<br>(-0.045 , -<br>0.037)<br>0.001 |
| GED                             | 0.172<br>p=0.863<br>(-0.005 ,<br>0.006)<br>-0.012    | -1.124<br>p=0.261<br>(-0.013 ,<br>0.004)<br>-0.031    | -1.947<br>p=0.052<br>(-0.019 ,<br>0.000)<br>-0.041    | 0.974<br>p=0.330<br>(-0.002 ,<br>0.005)<br>-0.003   | 0.558<br>p=0.577<br>(-0.004 ,<br>0.007)<br>-0.009    | 0.336<br>p=0.737<br>(-0.006 ,<br>0.008)<br>-0.016    |
| High School                     |                                                      |                                                       |                                                       |                                                     |                                                      |                                                      |

|                                                                   |                       |                       |                       |                       |                       |                       |
|-------------------------------------------------------------------|-----------------------|-----------------------|-----------------------|-----------------------|-----------------------|-----------------------|
|                                                                   | -6.039                | -10.370               | -12.154               | -2.868                | -4.636                | -7.393                |
|                                                                   | p<0.001               | p<0.001               | p<0.001               | p=0.004               | p<0.001               | p<0.001               |
| More Than High School                                             | (-0.016 , -<br>0.008) | (-0.036 , -<br>0.025) | (-0.048 , -<br>0.034) | (-0.005 , -<br>0.001) | (-0.012 , -<br>0.005) | (-0.021 , -<br>0.012) |
|                                                                   | -0.014                | -0.037                | -0.051                | -0.001                | -0.008                | -0.013                |
|                                                                   | -5.083                | -9.099                | -10.741               | -0.343                | -3.122                | -4.324                |
|                                                                   | p<0.001               | p<0.001               | p<0.001               | p=0.732               | p=0.002               | p<0.001               |
| Proportion of Quarters Employed in 23 quarters<br>Before Sentence | (-0.019 , -<br>0.009) | (-0.045 , -<br>0.029) | (-0.060 , -<br>0.041) | (-0.003 ,<br>0.002)   | (-0.013 , -<br>0.003) | (-0.019 , -<br>0.007) |
|                                                                   | -0.022                | -0.034                | -0.046                | -0.007                | -0.017                | -0.024                |
|                                                                   | -8.099                | -8.554                | -9.884                | -5.167                | -7.142                | -8.112                |
|                                                                   | p<0.001               | p<0.001               | p<0.001               | p<0.001               | p<0.001               | p<0.001               |
| Not Single                                                        | (-0.027 , -<br>0.017) | (-0.042 , -<br>0.026) | (-0.055 , -<br>0.036) | (-0.009 , -<br>0.004) | (-0.022 , -<br>0.013) | (-0.030 , -<br>0.018) |
|                                                                   | 0.004                 | 0.015                 | 0.018                 | 0.002                 | 0.005                 | 0.006                 |
|                                                                   | 2.114                 | 4.796                 | 5.172                 | 1.457                 | 2.413                 | 2.636                 |
|                                                                   | p=0.035               | p<0.001               | p<0.001               | p=0.145               | p=0.016               | p=0.008               |
| Any Use of Alcohol                                                | (0.000 ,<br>0.008)    | (0.009 ,<br>0.021)    | (0.011 ,<br>0.025)    | (-0.001 ,<br>0.004)   | (0.001 ,<br>0.008)    | (0.002 ,<br>0.010)    |
|                                                                   | 0.012                 | 0.026                 | 0.035                 | 0.003                 | 0.007                 | 0.017                 |
|                                                                   | 5.515                 | 8.296                 | 9.777                 | 2.425                 | 3.121                 | 6.705                 |
|                                                                   | p<0.001               | p<0.001               | p<0.001               | p=0.015               | p=0.002               | p<0.001               |
| Any Use of Marijuana                                              | (0.008 ,<br>0.016)    | (0.020 ,<br>0.033)    | (0.028 ,<br>0.042)    | (0.001 ,<br>0.005)    | (0.002 ,<br>0.011)    | (0.012 ,<br>0.021)    |
|                                                                   | 0.002                 | 0.009                 | 0.016                 | 0.002                 | 0.005                 | 0.010                 |
|                                                                   | 1.009                 | 3.229                 | 4.734                 | 2.019                 | 2.759                 | 4.854                 |
|                                                                   | p=0.313               | p<0.001               | p<0.001               | p=0.043               | p=0.006               | p<0.001               |
| Any Use of Stimulants (Cocaine or Amphetamine)                    | (-0.002 ,<br>0.006)   | (0.004 ,<br>0.015)    | (0.009 ,<br>0.022)    | (0.000 ,<br>0.004)    | (0.001 ,<br>0.008)    | (0.006 ,<br>0.015)    |
|                                                                   | 0.005                 | 0.017                 | 0.024                 | 0.004                 | 0.016                 | 0.025                 |
|                                                                   | 2.392                 | 5.539                 | 7.100                 | 3.873                 | 8.228                 | 10.733                |
|                                                                   | p=0.017               | p<0.001               | p<0.001               | p<0.001               | p<0.001               | p<0.001               |
| Any Use of Opioids                                                | (0.001 ,<br>0.009)    | (0.011 ,<br>0.023)    | (0.018 ,<br>0.031)    | (0.002 ,<br>0.006)    | (0.012 ,<br>0.020)    | (0.021 ,<br>0.030)    |
|                                                                   | -0.001                | -0.007                | -0.009                | 0.002                 | 0.006                 | 0.013                 |

|                              |                       |                       |                       |                     |                       |                       |
|------------------------------|-----------------------|-----------------------|-----------------------|---------------------|-----------------------|-----------------------|
|                              | -0.468                | -1.770                | -1.912                | 1.384               | 2.181                 | 3.971                 |
|                              | p=0.640               | p=0.077               | p=0.056               | p=0.166             | p=0.029               | p<0.001               |
| Any Use of Other Drugs       | (-0.007 ,<br>0.004)   | (-0.015 ,<br>0.001)   | (-0.017 ,<br>0.000)   | (-0.001 ,<br>0.005) | (0.001 ,<br>0.011)    | (0.007 ,<br>0.020)    |
|                              | 0.001                 | -0.003                | -0.008                | 0.001               | 0.001                 | 0.001                 |
|                              | 0.471                 | -0.750                | -2.038                | 0.626               | 0.582                 | 0.231                 |
|                              | p=0.637               | p=0.454               | p=0.042               | p=0.531             | p=0.561               | p=0.817               |
| Corrected Mental Health Flag | (-0.003 ,<br>0.006)   | (-0.009 ,<br>0.004)   | (-0.015 , -<br>0.000) | (-0.002 ,<br>0.003) | (-0.003 ,<br>0.006)   | (-0.005 ,<br>0.006)   |
|                              | 0.012                 | 0.021                 | 0.026                 | 0.003               | 0.010                 | 0.014                 |
|                              | 5.352                 | 6.381                 | 6.904                 | 2.054               | 4.359                 | 5.162                 |
|                              | p<0.001               | p<0.001               | p<0.001               | p=0.040             | p<0.001               | p<0.001               |
| 2004 Sentence Year           | (0.008 ,<br>0.017)    | (0.015 ,<br>0.028)    | (0.019 ,<br>0.034)    | (0.000 ,<br>0.005)  | (0.005 ,<br>0.014)    | (0.009 ,<br>0.019)    |
|                              | -0.002                | -0.002                | -0.007                | 0.001               | -0.006                | -0.011                |
|                              | -0.730                | -0.682                | -1.753                | 0.832               | -2.475                | -4.158                |
|                              | p=0.465               | p=0.495               | p=0.080               | p=0.405             | p=0.013               | p<0.001               |
| 2005 Sentence Year           | (-0.006 ,<br>0.003)   | (-0.009 ,<br>0.004)   | (-0.015 ,<br>0.001)   | (-0.001 ,<br>0.003) | (-0.010 , -<br>0.001) | (-0.016 , -<br>0.006) |
|                              | -0.008                | -0.017                | -0.023                | -0.001              | -0.012                | -0.020                |
|                              | -3.491                | -4.803                | -5.538                | -0.541              | -5.164                | -7.267                |
|                              | p<0.001               | p<0.001               | p<0.001               | p=0.588             | p<0.001               | p<0.001               |
| 2006 Sentence Year           | (-0.013 , -<br>0.004) | (-0.024 , -<br>0.010) | (-0.031 , -<br>0.015) | (-0.003 ,<br>0.002) | (-0.016 , -<br>0.007) | (-0.026 , -<br>0.015) |
|                              | -0.008                | -0.026                | -0.031                | -0.001              | -0.018                | -0.029                |
|                              | -3.253                | -7.101                | -7.222                | -0.638              | -7.628                | -10.353               |
|                              | p<0.001               | p<0.001               | p<0.001               | p=0.523             | p<0.001               | p<0.001               |
| 3, Allegan County            | (-0.013 , -<br>0.003) | (-0.033 , -<br>0.019) | (-0.040 , -<br>0.023) | (-0.003 ,<br>0.002) | (-0.022 , -<br>0.013) | (-0.034 , -<br>0.023) |
|                              | -0.005                | -0.013                | -0.025                | -0.003              | -0.012                | -0.017                |
|                              | -0.590                | -1.129                | -1.773                | -0.628              | -1.536                | -1.818                |
|                              | p=0.555               | p=0.259               | p=0.076               | p=0.530             | p=0.124               | p=0.069               |
| 5, Antrim County             | (-0.020 ,<br>0.011)   | (-0.036 ,<br>0.010)   | (-0.053 ,<br>0.003)   | (-0.011 ,<br>0.006) | (-0.027 ,<br>0.003)   | (-0.035 ,<br>0.001)   |
|                              | 0.017                 | 0.029                 | 0.006                 | 0.000               | 0.004                 | -0.002                |

|                      |                       |                       |                       |                       |                       |                       |
|----------------------|-----------------------|-----------------------|-----------------------|-----------------------|-----------------------|-----------------------|
|                      | 0.947                 | 1.001                 | 0.192                 | 0.040                 | 0.248                 | -0.126                |
|                      | p=0.344               | p=0.317               | p=0.848               | p=0.968               | p=0.804               | p=0.899               |
| 9, Bay County        | (-0.018 ,<br>0.053)   | (-0.028 ,<br>0.085)   | (-0.055 ,<br>0.067)   | (-0.013 ,<br>0.013)   | (-0.028 ,<br>0.036)   | (-0.036 ,<br>0.031)   |
|                      | -0.011                | -0.011                | -0.020                | -0.007                | -0.017                | -0.021                |
|                      | -1.415                | -0.949                | -1.462                | -2.005                | -2.242                | -2.182                |
|                      | p=0.157               | p=0.343               | p=0.144               | p=0.045               | p=0.025               | p=0.029               |
| 11, Berrien County   | (-0.026 ,<br>0.004)   | (-0.034 ,<br>0.012)   | (-0.046 ,<br>0.007)   | (-0.014 , -<br>0.000) | (-0.032 , -<br>0.002) | (-0.040 , -<br>0.002) |
|                      | -0.023                | -0.026                | -0.023                | -0.006                | -0.006                | -0.005                |
|                      | -2.553                | -2.038                | -1.596                | -1.109                | -0.629                | -0.476                |
|                      | p=0.011               | p=0.042               | p=0.111               | p=0.268               | p=0.530               | p=0.634               |
| 13, Calhoun County   | (-0.040 , -<br>0.005) | (-0.052 , -<br>0.001) | (-0.052 ,<br>0.005)   | (-0.016 ,<br>0.004)   | (-0.023 ,<br>0.012)   | (-0.027 ,<br>0.016)   |
|                      | -0.012                | -0.019                | -0.028                | -0.005                | -0.011                | -0.015                |
|                      | -1.846                | -1.994                | -2.630                | -1.540                | -1.685                | -2.070                |
|                      | p=0.065               | p=0.046               | p=0.009               | p=0.124               | p=0.092               | p=0.038               |
| 19, Clinton County   | (-0.024 ,<br>0.001)   | (-0.037 , -<br>0.000) | (-0.050 , -<br>0.007) | (-0.012 ,<br>0.001)   | (-0.023 ,<br>0.002)   | (-0.030 , -<br>0.001) |
|                      | 0.012                 | 0.023                 | 0.015                 | -0.005                | -0.003                | -0.010                |
|                      | 0.781                 | 0.998                 | 0.599                 | -0.550                | -0.228                | -0.598                |
|                      | p=0.435               | p=0.318               | p=0.549               | p=0.582               | p=0.819               | p=0.550               |
| 22, Dickinson County | (-0.018 ,<br>0.041)   | (-0.023 ,<br>0.070)   | (-0.035 ,<br>0.066)   | (-0.021 ,<br>0.012)   | (-0.031 ,<br>0.025)   | (-0.042 ,<br>0.022)   |
|                      | -0.005                | 0.001                 | -0.008                | -0.006                | -0.004                | -0.007                |
|                      | -0.584                | 0.041                 | -0.455                | -1.077                | -0.415                | -0.577                |
|                      | p=0.560               | p=0.967               | p=0.649               | p=0.281               | p=0.678               | p=0.564               |
| 23, Eaton County     | (-0.021 ,<br>0.011)   | (-0.032 ,<br>0.033)   | (-0.044 ,<br>0.028)   | (-0.016 ,<br>0.005)   | (-0.022 ,<br>0.014)   | (-0.031 ,<br>0.017)   |
|                      | 0.002                 | 0.001                 | 0.003                 | -0.000                | 0.001                 | -0.005                |
|                      | 0.192                 | 0.059                 | 0.214                 | -0.072                | 0.167                 | -0.566                |
|                      | p=0.848               | p=0.953               | p=0.831               | p=0.943               | p=0.868               | p=0.571               |
| 25, Genesee County   | (-0.015 ,<br>0.018)   | (-0.022 ,<br>0.024)   | (-0.023 ,<br>0.029)   | (-0.009 ,<br>0.008)   | (-0.014 ,<br>0.017)   | (-0.023 ,<br>0.013)   |
|                      | -0.001                | 0.002                 | -0.009                | 0.001                 | 0.002                 | -0.003                |

|                           |                                                                                                                |                                                                                                                 |                                                                                                                |                                                                                                                   |                                                                                                               |                                                                                                                    |
|---------------------------|----------------------------------------------------------------------------------------------------------------|-----------------------------------------------------------------------------------------------------------------|----------------------------------------------------------------------------------------------------------------|-------------------------------------------------------------------------------------------------------------------|---------------------------------------------------------------------------------------------------------------|--------------------------------------------------------------------------------------------------------------------|
| 28, Grand Traverse County | -0.207<br>p=0.836<br>(-0.011 ,<br>0.009)<br>0.013<br>1.131<br>p=0.258<br>(-0.009 ,<br>0.035)<br>0.002<br>0.135 | 0.255<br>p=0.798<br>(-0.013 ,<br>0.016)<br>0.019<br>1.189<br>p=0.234<br>(-0.012 ,<br>0.050)<br>-0.002<br>-0.082 | -1.122<br>p=0.262<br>(-0.026 ,<br>0.007)<br>0.005<br>0.255<br>p=0.799<br>(-0.030 ,<br>0.039)<br>0.005<br>0.188 | 0.491<br>p=0.624<br>(-0.004 ,<br>0.006)<br>-0.002<br>-0.492<br>p=0.623<br>(-0.008 ,<br>0.005)<br>-0.006<br>-0.537 | 0.358<br>p=0.720<br>(-0.007 ,<br>0.010)<br>0.002<br>0.180<br>p=0.857<br>(-0.015 ,<br>0.018)<br>0.002<br>0.094 | -0.586<br>p=0.558<br>(-0.013 ,<br>0.007)<br>-0.001<br>-0.113<br>p=0.910<br>(-0.022 ,<br>0.020)<br>-0.012<br>-0.678 |
| 29, Gratiot County        |                                                                                                                |                                                                                                                 |                                                                                                                |                                                                                                                   |                                                                                                               |                                                                                                                    |
| 33, Ingham County         |                                                                                                                |                                                                                                                 |                                                                                                                |                                                                                                                   |                                                                                                               |                                                                                                                    |
| 34, Ionia County          |                                                                                                                |                                                                                                                 |                                                                                                                |                                                                                                                   |                                                                                                               |                                                                                                                    |
| 35, Iosco County          |                                                                                                                |                                                                                                                 |                                                                                                                |                                                                                                                   |                                                                                                               |                                                                                                                    |
| 37, Isabella County       |                                                                                                                |                                                                                                                 |                                                                                                                |                                                                                                                   |                                                                                                               |                                                                                                                    |
| 38, Jackson County        |                                                                                                                |                                                                                                                 |                                                                                                                |                                                                                                                   |                                                                                                               |                                                                                                                    |

|                       |                                                              |                                                              |                                                              |                                                              |                                                              |                                                              |
|-----------------------|--------------------------------------------------------------|--------------------------------------------------------------|--------------------------------------------------------------|--------------------------------------------------------------|--------------------------------------------------------------|--------------------------------------------------------------|
| 39, Kalamazoo County  | -1.110<br>p=0.267<br>(-0.023 ,<br>0.006)<br>-0.008<br>-1.405 | -1.500<br>p=0.134<br>(-0.038 ,<br>0.005)<br>-0.012<br>-1.410 | -1.808<br>p=0.071<br>(-0.047 ,<br>0.002)<br>-0.022<br>-2.255 | -0.815<br>p=0.415<br>(-0.012 ,<br>0.005)<br>-0.001<br>-0.458 | -0.371<br>p=0.710<br>(-0.016 ,<br>0.011)<br>-0.005<br>-0.936 | -1.581<br>p=0.114<br>(-0.029 ,<br>0.003)<br>-0.009<br>-1.411 |
| 41, Kent County       | p=0.160<br>(-0.020 ,<br>0.003)<br>-0.011<br>-2.273           | p=0.159<br>(-0.029 ,<br>0.005)<br>-0.019<br>-2.686           | p=0.024<br>(-0.041 , -<br>0.003)<br>-0.030<br>-3.764         | p=0.647<br>(-0.008 ,<br>0.005)<br>-0.003<br>-1.261           | p=0.349<br>(-0.016 ,<br>0.006)<br>-0.008<br>-1.775           | p=0.158<br>(-0.022 ,<br>0.004)<br>-0.016<br>-2.870           |
| 44, Lapeer County     | p=0.023<br>(-0.021 , -<br>0.002)<br>-0.006<br>-0.722         | p=0.007<br>(-0.033 , -<br>0.005)<br>-0.004<br>-0.301         | p<0.001<br>(-0.046 , -<br>0.015)<br>-0.004<br>-0.282         | p=0.207<br>(-0.009 ,<br>0.002)<br>0.000<br>0.037             | p=0.076<br>(-0.017 ,<br>0.001)<br>-0.002<br>-0.272           | p=0.004<br>(-0.027 , -<br>0.005)<br>-0.001<br>-0.053         |
| 46, Lenawee County    | p=0.470<br>(-0.022 ,<br>0.010)<br>-0.009<br>-0.684           | p=0.763<br>(-0.029 ,<br>0.021)<br>-0.009<br>-0.461           | p=0.778<br>(-0.034 ,<br>0.025)<br>-0.038<br>-1.751           | p=0.971<br>(-0.009 ,<br>0.009)<br>-0.012<br>-1.911           | p=0.786<br>(-0.018 ,<br>0.014)<br>-0.006<br>-0.521           | p=0.958<br>(-0.019 ,<br>0.018)<br>-0.025<br>-1.741           |
| 47, Livingston County | p=0.494<br>(-0.035 ,<br>0.017)<br>0.011<br>1.723             | p=0.645<br>(-0.047 ,<br>0.029)<br>0.012<br>1.435             | p=0.080<br>(-0.081 ,<br>0.005)<br>0.014<br>1.338             | p=0.056<br>(-0.025 ,<br>0.000)<br>-0.000<br>-0.085           | p=0.603<br>(-0.031 ,<br>0.018)<br>-0.005<br>-0.828           | p=0.082<br>(-0.054 ,<br>0.003)<br>-0.004<br>-0.555           |
| 50, Macomb County     | p=0.085<br>(-0.001 ,<br>0.023)<br>-0.003<br>-0.666           | p=0.151<br>(-0.005 ,<br>0.030)<br>0.000<br>0.019             | p=0.181<br>(-0.007 ,<br>0.035)<br>-0.002<br>-0.340           | p=0.932<br>(-0.008 ,<br>0.007)<br>-0.002<br>-0.828           | p=0.408<br>(-0.018 ,<br>0.007)<br>-0.005<br>-1.212           | p=0.579<br>(-0.020 ,<br>0.011)<br>-0.006<br>-1.209           |
| 56, Midland County    | p=0.505<br>(-0.010 ,<br>0.005)<br>0.004                      | p=0.985<br>(-0.011 ,<br>0.012)<br>0.012                      | p=0.734<br>(-0.015 ,<br>0.011)<br>0.007                      | p=0.408<br>(-0.006 ,<br>0.002)<br>-0.000                     | p=0.226<br>(-0.012 ,<br>0.003)<br>0.000                      | p=0.227<br>(-0.015 ,<br>0.004)<br>0.005                      |

|                     |                     |                     |                     |                     |                     |                     |
|---------------------|---------------------|---------------------|---------------------|---------------------|---------------------|---------------------|
|                     | 0.497               | 0.875               | 0.470               | -0.009              | 0.021               | 0.414               |
|                     | p=0.619             | p=0.381             | p=0.638             | p=0.993             | p=0.983             | p=0.679             |
| 58, Monroe County   | (-0.013 ,<br>0.022) | (-0.014 ,<br>0.038) | (-0.022 ,<br>0.036) | (-0.011 ,<br>0.011) | (-0.018 ,<br>0.019) | (-0.017 ,<br>0.027) |
|                     | -0.003              | -0.007              | -0.014              | -0.006              | -0.003              | -0.013              |
|                     | -0.330              | -0.589              | -0.981              | -1.269              | -0.396              | -1.267              |
|                     | p=0.741             | p=0.556             | p=0.326             | p=0.205             | p=0.692             | p=0.205             |
| 59, Montcalm County | (-0.020 ,<br>0.014) | (-0.032 ,<br>0.017) | (-0.043 ,<br>0.014) | (-0.016 ,<br>0.003) | (-0.019 ,<br>0.013) | (-0.032 ,<br>0.007) |
|                     | 0.005               | 0.014               | 0.034               | -0.002              | 0.002               | 0.007               |
|                     | 0.513               | 0.972               | 1.894               | -0.409              | 0.163               | 0.576               |
|                     | p=0.608             | p=0.331             | p=0.058             | p=0.683             | p=0.871             | p=0.565             |
| 61, Muskegon County | (-0.014 ,<br>0.023) | (-0.014 ,<br>0.043) | (-0.001 ,<br>0.070) | (-0.011 ,<br>0.007) | (-0.018 ,<br>0.021) | (-0.017 ,<br>0.030) |
|                     | -0.002              | -0.009              | -0.013              | -0.001              | -0.004              | -0.008              |
|                     | -0.368              | -1.048              | -1.335              | -0.230              | -0.678              | -1.108              |
|                     | p=0.713             | p=0.295             | p=0.182             | p=0.818             | p=0.498             | p=0.268             |
| 62, Newaygo County  | (-0.014 ,<br>0.010) | (-0.027 ,<br>0.008) | (-0.033 ,<br>0.006) | (-0.008 ,<br>0.006) | (-0.016 ,<br>0.008) | (-0.021 ,<br>0.006) |
|                     | -0.001              | -0.009              | -0.009              | 0.005               | 0.007               | 0.002               |
|                     | -0.094              | -0.565              | -0.480              | 0.810               | 0.635               | 0.116               |
|                     | p=0.925             | p=0.572             | p=0.632             | p=0.418             | p=0.526             | p=0.907             |
| 64, Oceana County   | (-0.021 ,<br>0.019) | (-0.041 ,<br>0.023) | (-0.045 ,<br>0.027) | (-0.008 ,<br>0.019) | (-0.015 ,<br>0.029) | (-0.024 ,<br>0.027) |
|                     | 0.006               | -0.008              | 0.006               | 0.004               | -0.002              | -0.010              |
|                     | 0.344               | -0.329              | 0.237               | 0.405               | -0.117              | -0.576              |
|                     | p=0.731             | p=0.742             | p=0.813             | p=0.685             | p=0.907             | p=0.565             |
| 70, Ottawa County   | (-0.028 ,<br>0.040) | (-0.053 ,<br>0.038) | (-0.046 ,<br>0.059) | (-0.014 ,<br>0.022) | (-0.028 ,<br>0.025) | (-0.045 ,<br>0.025) |
|                     | -0.001              | 0.010               | 0.009               | -0.001              | -0.001              | 0.003               |
|                     | -0.156              | 1.175               | 0.886               | -0.190              | -0.235              | 0.420               |
|                     | p=0.876             | p=0.240             | p=0.376             | p=0.849             | p=0.814             | p=0.674             |
| 73, Saginaw County  | (-0.012 ,<br>0.011) | (-0.007 ,<br>0.027) | (-0.011 ,<br>0.028) | (-0.007 ,<br>0.006) | (-0.012 ,<br>0.010) | (-0.011 ,<br>0.017) |
|                     | -0.009              | -0.022              | -0.032              | -0.005              | -0.013              | -0.022              |

|                                 |                       |                       |                       |                       |                       |                       |
|---------------------------------|-----------------------|-----------------------|-----------------------|-----------------------|-----------------------|-----------------------|
|                                 | -1.381                | -2.348                | -3.016                | -1.537                | -2.134                | -3.013                |
|                                 | p=0.167               | p=0.019               | p=0.003               | p=0.124               | p=0.033               | p=0.003               |
| 77, St. Clair County            | (-0.022 ,<br>0.004)   | (-0.041 , -<br>0.004) | (-0.053 , -<br>0.011) | (-0.010 ,<br>0.001)   | (-0.024 , -<br>0.001) | (-0.036 , -<br>0.008) |
|                                 | 0.002                 | 0.003                 | -0.008                | -0.004                | -0.006                | -0.009                |
|                                 | 0.370                 | 0.299                 | -0.817                | -1.315                | -0.933                | -1.210                |
|                                 | p=0.711               | p=0.765               | p=0.414               | p=0.188               | p=0.351               | p=0.226               |
| 78, St. Joseph County           | (-0.009 ,<br>0.014)   | (-0.015 ,<br>0.020)   | (-0.029 ,<br>0.012)   | (-0.011 ,<br>0.002)   | (-0.018 ,<br>0.006)   | (-0.023 ,<br>0.006)   |
|                                 | -0.014                | -0.020                | -0.030                | -0.010                | -0.022                | -0.021                |
|                                 | -1.095                | -1.091                | -1.414                | -1.360                | -1.899                | -1.527                |
|                                 | p=0.273               | p=0.275               | p=0.157               | p=0.174               | p=0.058               | p=0.127               |
| 81, Washtenaw County            | (-0.038 ,<br>0.011)   | (-0.055 ,<br>0.016)   | (-0.070 ,<br>0.011)   | (-0.024 ,<br>0.004)   | (-0.044 ,<br>0.001)   | (-0.048 ,<br>0.006)   |
|                                 | -0.018                | -0.024                | -0.027                | -0.006                | -0.012                | -0.022                |
|                                 | -3.130                | -2.760                | -2.686                | -1.826                | -1.951                | -3.052                |
|                                 | p=0.002               | p=0.006               | p=0.007               | p=0.068               | p=0.051               | p=0.002               |
| 84, Wayne County , AOI Docket   | (-0.030 , -<br>0.007) | (-0.042 , -<br>0.007) | (-0.047 , -<br>0.007) | (-0.013 ,<br>0.000)   | (-0.023 ,<br>0.000)   | (-0.035 , -<br>0.008) |
|                                 | -0.006                | -0.013                | -0.015                | -0.000                | -0.001                | 0.000                 |
|                                 | -1.489                | -2.094                | -2.206                | -0.114                | -0.233                | 0.061                 |
|                                 | p=0.137               | p=0.036               | p=0.027               | p=0.909               | p=0.815               | p=0.952               |
| 85, Wayne County , Trial Docket | (-0.014 ,<br>0.002)   | (-0.025 , -<br>0.001) | (-0.029 , -<br>0.002) | (-0.005 ,<br>0.004)   | (-0.009 ,<br>0.007)   | (-0.009 ,<br>0.010)   |
|                                 | -0.011                | -0.026                | -0.036                | 0.000                 | -0.004                | -0.008                |
|                                 | -2.650                | -4.258                | -5.203                | 0.068                 | -1.055                | -1.678                |
|                                 | p=0.008               | p<0.001               | p<0.001               | p=0.946               | p=0.292               | p=0.093               |
| Constant                        | (-0.019 , -<br>0.003) | (-0.038 , -<br>0.014) | (-0.049 , -<br>0.022) | (-0.004 ,<br>0.004)   | (-0.012 ,<br>0.004)   | (-0.017 ,<br>0.001)   |
|                                 | -0.020                | -0.064                | -0.067                | -0.011                | -0.020                | -0.036                |
|                                 | -2.808                | -6.063                | -5.722                | -2.801                | -2.933                | -4.444                |
|                                 | p=0.005               | p<0.001               | p<0.001               | p=0.005               | p=0.003               | p<0.001               |
|                                 | (-0.034 , -<br>0.006) | (-0.085 , -<br>0.043) | (-0.090 , -<br>0.044) | (-0.018 , -<br>0.003) | (-0.033 , -<br>0.007) | (-0.051 , -<br>0.020) |



|                    |         |         |         |         |         |         |
|--------------------|---------|---------|---------|---------|---------|---------|
| Observations       | 78,856  | 78,425  | 76,748  | 79,094  | 78,949  | 78,667  |
| Wald Chi2          | 1613    | 3868    | 5255    | 576.7   | 1827    | 2919    |
| Degrees of Freedom | 67      | 67      | 67      | 67      | 67      | 67      |
| P-value            | p<0.001 | p<0.001 | p<0.001 | p<0.001 | p<0.001 | p<0.001 |
| R-squared          | 0.018   | 0.039   | 0.054   | 0.006   | 0.020   | 0.033   |

|                                       | <b>Baseline Violent Offense</b>        |                                  |                                |                                        |                                |                                |
|---------------------------------------|----------------------------------------|----------------------------------|--------------------------------|----------------------------------------|--------------------------------|--------------------------------|
|                                       | <b>Ever Arrested for Violent Crime</b> |                                  |                                | <b>Ever Convicted of Violent Crime</b> |                                |                                |
|                                       | <b>1 Year</b>                          | <b>3 Years</b>                   | <b>5 Years</b>                 | <b>1 Year</b>                          | <b>3 Years</b>                 | <b>5 Years</b>                 |
| Prison Only                           | -0.013                                 | -0.020                           | -0.042                         | -0.005                                 | -0.023                         | -0.017                         |
|                                       | -0.935                                 | -0.959                           | -1.571                         | -0.587                                 | -1.543                         | -0.956                         |
|                                       | p=0.350<br>(-0.041 ,<br>0.015)         | p=0.337<br>(-0.062 ,<br>0.021)   | p=0.116<br>(-0.094 ,<br>0.010) | p=0.557<br>(-0.022 ,<br>0.012)         | p=0.123<br>(-0.052 ,<br>0.006) | p=0.339<br>(-0.051 ,<br>0.017) |
| Prison X Incarceration Length         | -0.001                                 | -0.003                           | -0.002                         | -0.001                                 | -0.001                         | -0.001                         |
|                                       | -2.450                                 | -3.354                           | -1.300                         | -2.853                                 | -1.311                         | -1.119                         |
|                                       | p=0.014<br>(-0.002 , -<br>0.000)       | p<0.001<br>(-0.004 , -<br>0.001) | p=0.193<br>(-0.005 ,<br>0.001) | p=0.004<br>(-0.001 , -<br>0.000)       | p=0.190<br>(-0.001 ,<br>0.000) | p=0.263<br>(-0.002 ,<br>0.001) |
| Prison X Incarceration Length Squared | 0.000                                  | 0.000                            | 0.000                          | 0.000                                  | 0.000                          | 0.000                          |
|                                       | 1.286                                  | 1.944                            | 0.757                          | 1.199                                  | 0.451                          | 0.245                          |
|                                       | p=0.198<br>(-0.000 ,<br>0.000)         | p=0.052<br>(-0.000 ,<br>0.000)   | p=0.449<br>(-0.000 ,<br>0.000) | p=0.231<br>(-0.000 ,<br>0.000)         | p=0.652<br>(-0.000 ,<br>0.000) | p=0.806<br>(-0.000 ,<br>0.000) |
| Probation X Probation Length          | -0.000                                 | 0.000                            | 0.001                          | 0.000                                  | 0.000                          | 0.001                          |
|                                       | -0.535                                 | 0.331                            | 0.445                          | 0.798                                  | 0.348                          | 1.307                          |
|                                       | p=0.593<br>(-0.002 ,<br>0.001)         | p=0.740<br>(-0.002 ,<br>0.003)   | p=0.656<br>(-0.002 ,<br>0.003) | p=0.425<br>(-0.001 ,<br>0.001)         | p=0.728<br>(-0.001 ,<br>0.002) | p=0.191<br>(-0.001 ,<br>0.003) |
| Probation X Probation Length Squared  | 0.000                                  | 0.000                            | 0.000                          | -0.000                                 | 0.000                          | 0.000                          |
|                                       | 0.510                                  | 0.540                            | 0.346                          | -0.750                                 | 0.410                          | 0.258                          |
|                                       | p=0.610<br>(-0.000 ,<br>0.000)         | p=0.589<br>(-0.000 ,<br>0.000)   | p=0.729<br>(-0.000 ,<br>0.000) | p=0.454<br>(-0.000 ,<br>0.000)         | p=0.682<br>(-0.000 ,<br>0.000) | p=0.797<br>(-0.000 ,<br>0.000) |

|                                                |                                |                                  |                                  |                                  |                                  |                                  |
|------------------------------------------------|--------------------------------|----------------------------------|----------------------------------|----------------------------------|----------------------------------|----------------------------------|
| Jail Only                                      | -0.491                         | 0.084                            | 0.264                            | -0.559                           | -1.134                           | -1.178                           |
|                                                | -1.145                         | 0.140                            | 0.417                            | -1.990                           | -2.517                           | -2.266                           |
|                                                | p=0.252<br>(-1.331 ,<br>0.350) | p=0.888<br>(-1.089 ,<br>1.256)   | p=0.677<br>(-0.977 ,<br>1.505)   | p=0.047<br>(-1.109 , -<br>0.008) | p=0.012<br>(-2.018 , -<br>0.251) | p=0.023<br>(-2.197 , -<br>0.159) |
| Jail X Incarceration Length                    | -0.077                         | 0.002                            | 0.030                            | -0.069                           | -0.143                           | -0.148                           |
|                                                | -1.438                         | 0.022                            | 0.382                            | -1.965                           | -2.552                           | -2.292                           |
|                                                | p=0.151<br>(-0.182 ,<br>0.028) | p=0.982<br>(-0.145 ,<br>0.148)   | p=0.702<br>(-0.125 ,<br>0.185)   | p=0.049<br>(-0.138 , -<br>0.000) | p=0.011<br>(-0.252 , -<br>0.033) | p=0.022<br>(-0.274 , -<br>0.021) |
| Jail X Incarceration Length Squared            | -0.003                         | 0.000                            | 0.001                            | -0.002                           | -0.004                           | -0.004                           |
|                                                | -1.578                         | 0.063                            | 0.453                            | -1.865                           | -2.488                           | -2.221                           |
|                                                | p=0.115<br>(-0.006 ,<br>0.001) | p=0.950<br>(-0.004 ,<br>0.005)   | p=0.651<br>(-0.004 ,<br>0.006)   | p=0.062<br>(-0.004 ,<br>0.000)   | p=0.013<br>(-0.007 , -<br>0.001) | p=0.026<br>(-0.008 , -<br>0.001) |
| Jail with Probation Only                       | 0.003                          | 0.005                            | -0.008                           | 0.004                            | -0.017                           | -0.028                           |
|                                                | 0.258                          | 0.275                            | -0.433                           | 0.437                            | -1.317                           | -1.827                           |
|                                                | p=0.796<br>(-0.022 ,<br>0.029) | p=0.783<br>(-0.031 ,<br>0.041)   | p=0.665<br>(-0.047 ,<br>0.030)   | p=0.662<br>(-0.012 ,<br>0.019)   | p=0.188<br>(-0.043 ,<br>0.008)   | p=0.068<br>(-0.057 ,<br>0.002)   |
| Jail with Probation X Probation Length         | -0.001                         | -0.001                           | -0.002                           | -0.000                           | -0.000                           | -0.001                           |
|                                                | -1.603                         | -1.907                           | -2.448                           | -1.385                           | -0.594                           | -1.487                           |
|                                                | p=0.109<br>(-0.002 ,<br>0.000) | p=0.057<br>(-0.003 ,<br>0.000)   | p=0.014<br>(-0.004 , -<br>0.000) | p=0.166<br>(-0.001 ,<br>0.000)   | p=0.553<br>(-0.001 ,<br>0.001)   | p=0.137<br>(-0.002 ,<br>0.000)   |
| Jail with Probation X Probation Length Squared | 0.000                          | 0.000                            | 0.000                            | 0.000                            | 0.000                            | 0.000                            |
|                                                | 1.635                          | 1.754                            | 2.181                            | 1.477                            | 0.687                            | 1.467                            |
|                                                | p=0.102<br>(-0.000 ,<br>0.000) | p=0.079<br>(-0.000 ,<br>0.000)   | p=0.029<br>(0.000 ,<br>0.000)    | p=0.140<br>(-0.000 ,<br>0.000)   | p=0.492<br>(-0.000 ,<br>0.000)   | p=0.142<br>(-0.000 ,<br>0.000)   |
| 0 Prior Felony                                 | -0.004                         | -0.018                           | -0.037                           | -0.007                           | -0.018                           | -0.021                           |
|                                                | -0.930                         | -2.544                           | -4.627                           | -2.688                           | -3.738                           | -3.631                           |
|                                                | p=0.352<br>(-0.013 ,<br>0.005) | p=0.011<br>(-0.031 , -<br>0.004) | p<0.001<br>(-0.053 , -<br>0.021) | p=0.007<br>(-0.012 , -<br>0.002) | p<0.001<br>(-0.027 , -<br>0.008) | p<0.001<br>(-0.032 , -<br>0.009) |

|                                 |                                  |                                  |                                  |                                  |                                  |                                  |
|---------------------------------|----------------------------------|----------------------------------|----------------------------------|----------------------------------|----------------------------------|----------------------------------|
| 5-9 Prior Arrests (ref: 0-4)    | 0.027                            | 0.062                            | 0.078                            | 0.009                            | 0.027                            | 0.035                            |
|                                 | 6.503                            | 10.175                           | 11.032                           | 3.856                            | 6.503                            | 7.129                            |
|                                 | p<0.001<br>(0.019 ,<br>0.035)    | p<0.001<br>(0.050 ,<br>0.074)    | p<0.001<br>(0.064 ,<br>0.092)    | p<0.001<br>(0.005 ,<br>0.014)    | p<0.001<br>(0.019 ,<br>0.035)    | p<0.001<br>(0.026 ,<br>0.045)    |
| 10+ Prior Arrests               | 0.059                            | 0.120                            | 0.147                            | 0.020                            | 0.061                            | 0.083                            |
|                                 | 10.404                           | 14.565                           | 15.386                           | 6.096                            | 10.719                           | 12.143                           |
|                                 | p<0.001<br>(0.048 ,<br>0.070)    | p<0.001<br>(0.104 ,<br>0.136)    | p<0.001<br>(0.128 ,<br>0.166)    | p<0.001<br>(0.013 ,<br>0.026)    | p<0.001<br>(0.050 ,<br>0.072)    | p<0.001<br>(0.070 ,<br>0.097)    |
| Non-White                       | 0.030                            | 0.079                            | 0.088                            | 0.001                            | 0.016                            | 0.031                            |
|                                 | 7.722                            | 13.865                           | 13.421                           | 0.491                            | 4.178                            | 6.535                            |
|                                 | p<0.001<br>(0.023 ,<br>0.038)    | p<0.001<br>(0.068 ,<br>0.090)    | p<0.001<br>(0.075 ,<br>0.101)    | p=0.623<br>(-0.003 ,<br>0.006)   | p<0.001<br>(0.009 ,<br>0.024)    | p<0.001<br>(0.022 ,<br>0.040)    |
| Age at Sentence Demeaned        | -0.000                           | -0.001                           | -0.001                           | -0.000                           | -0.001                           | -0.001                           |
|                                 | -1.647                           | -1.675                           | -1.599                           | -2.460                           | -2.560                           | -2.847                           |
|                                 | p=0.100<br>(-0.001 ,<br>0.000)   | p=0.094<br>(-0.001 ,<br>0.000)   | p=0.110<br>(-0.001 ,<br>0.000)   | p=0.014<br>(-0.001 , -<br>0.000) | p=0.010<br>(-0.001 , -<br>0.000) | p=0.004<br>(-0.001 , -<br>0.000) |
| Age at Sentence Demeaned Square | 0.000                            | 0.000                            | 0.000                            | 0.000                            | 0.000                            | 0.000                            |
|                                 | 2.084                            | 2.738                            | 2.499                            | 3.301                            | 3.672                            | 4.107                            |
|                                 | p=0.037<br>(0.000 ,<br>0.000)    | p=0.006<br>(0.000 ,<br>0.000)    | p=0.012<br>(0.000 ,<br>0.000)    | p<0.001<br>(0.000 ,<br>0.000)    | p<0.001<br>(0.000 ,<br>0.000)    | p<0.001<br>(0.000 ,<br>0.000)    |
| Sex                             | -0.033                           | -0.063                           | -0.092                           | -0.014                           | -0.039                           | -0.060                           |
|                                 | -6.849                           | -8.969                           | -11.516                          | -5.580                           | -8.538                           | -11.349                          |
|                                 | p<0.001<br>(-0.042 , -<br>0.023) | p<0.001<br>(-0.077 , -<br>0.049) | p<0.001<br>(-0.108 , -<br>0.077) | p<0.001<br>(-0.019 , -<br>0.009) | p<0.001<br>(-0.048 , -<br>0.030) | p<0.001<br>(-0.071 , -<br>0.050) |
| GED                             | 0.004                            | -0.003                           | -0.007                           | -0.000                           | 0.004                            | -0.004                           |
|                                 | 0.788                            | -0.396                           | -0.722                           | -0.070                           | 0.722                            | -0.521                           |
|                                 | p=0.431<br>(-0.007 ,<br>0.015)   | p=0.692<br>(-0.019 ,<br>0.013)   | p=0.470<br>(-0.025 ,<br>0.012)   | p=0.944<br>(-0.007 ,<br>0.006)   | p=0.470<br>(-0.007 ,<br>0.015)   | p=0.603<br>(-0.017 ,<br>0.010)   |

|                                                             |                                                      |                                                      |                                                      |                                                      |                                                      |                                                      |
|-------------------------------------------------------------|------------------------------------------------------|------------------------------------------------------|------------------------------------------------------|------------------------------------------------------|------------------------------------------------------|------------------------------------------------------|
| High School                                                 | -0.011<br>-2.770<br>p=0.006<br>(-0.018 , -<br>0.003) | -0.032<br>-5.611<br>p<0.001<br>(-0.043 , -<br>0.021) | -0.044<br>-6.553<br>p<0.001<br>(-0.057 , -<br>0.031) | -0.006<br>-2.896<br>p=0.004<br>(-0.011 , -<br>0.002) | -0.012<br>-3.129<br>p=0.002<br>(-0.020 , -<br>0.005) | -0.021<br>-4.531<br>p<0.001<br>(-0.030 , -<br>0.012) |
| More Than High School                                       | -0.022<br>-4.213<br>p<0.001<br>(-0.032 , -<br>0.012) | -0.041<br>-4.939<br>p<0.001<br>(-0.057 , -<br>0.025) | -0.063<br>-6.550<br>p<0.001<br>(-0.082 , -<br>0.044) | -0.004<br>-1.390<br>p=0.164<br>(-0.011 ,<br>0.002)   | -0.006<br>-1.074<br>p=0.283<br>(-0.017 ,<br>0.005)   | -0.016<br>-2.353<br>p=0.019<br>(-0.029 , -<br>0.003) |
| proportion quarters employed in 23 quarters before sentence | -0.024<br>-4.726<br>p<0.001<br>(-0.034 , -<br>0.014) | -0.039<br>-4.903<br>p<0.001<br>(-0.054 , -<br>0.023) | -0.048<br>-5.187<br>p<0.001<br>(-0.066 , -<br>0.030) | -0.014<br>-4.743<br>p<0.001<br>(-0.019 , -<br>0.008) | -0.036<br>-7.071<br>p<0.001<br>(-0.046 , -<br>0.026) | -0.045<br>-7.169<br>p<0.001<br>(-0.057 , -<br>0.032) |
| Not Single                                                  | 0.003<br>0.666<br>p=0.506<br>(-0.006 ,<br>0.011)     | 0.011<br>1.784<br>p=0.074<br>(-0.001 ,<br>0.024)     | 0.012<br>1.575<br>p=0.115<br>(-0.003 ,<br>0.026)     | -0.002<br>-0.780<br>p=0.436<br>(-0.006 ,<br>0.003)   | -0.004<br>-1.077<br>p=0.281<br>(-0.013 ,<br>0.004)   | -0.005<br>-0.951<br>p=0.342<br>(-0.015 ,<br>0.005)   |
| Any Use of Alcohol                                          | 0.002<br>0.444<br>p=0.657<br>(-0.007 ,<br>0.011)     | 0.035<br>5.129<br>p<0.001<br>(0.021 ,<br>0.048)      | 0.044<br>5.629<br>p<0.001<br>(0.029 ,<br>0.060)      | 0.006<br>2.086<br>p=0.037<br>(0.000 ,<br>0.011)      | 0.017<br>3.600<br>p<0.001<br>(0.008 ,<br>0.026)      | 0.032<br>5.560<br>p<0.001<br>(0.020 ,<br>0.043)      |
| Any Use of Marijuana                                        | 0.002<br>0.590<br>p=0.555<br>(-0.005 ,<br>0.010)     | 0.009<br>1.613<br>p=0.107<br>(-0.002 ,<br>0.021)     | 0.025<br>3.651<br>p<0.001<br>(0.011 ,<br>0.038)      | 0.000<br>0.195<br>p=0.845<br>(-0.004 ,<br>0.005)     | 0.010<br>2.537<br>p=0.011<br>(0.002 ,<br>0.018)      | 0.023<br>4.806<br>p<0.001<br>(0.013 ,<br>0.032)      |
| Any Use of Stimulants (Cocaine or Amphetamine)              | 0.015<br>3.358<br>p<0.001<br>(0.006 ,                | 0.026<br>3.941<br>p<0.001<br>(0.013 ,                | 0.037<br>4.841<br>p<0.001<br>(0.022 ,                | 0.009<br>3.288<br>p<0.001<br>(0.004 ,                | 0.034<br>7.173<br>p<0.001<br>(0.025 ,                | 0.050<br>8.868<br>p<0.001<br>(0.039 ,                |

|                              |             |             |             |             |             |             |
|------------------------------|-------------|-------------|-------------|-------------|-------------|-------------|
|                              | 0.024)      | 0.039)      | 0.052)      | 0.015)      | 0.043)      | 0.061)      |
| Any Use of Opioids           | -0.007      | -0.009      | -0.017      | 0.008       | 0.010       | 0.012       |
|                              | -1.179      | -1.028      | -1.599      | 1.812       | 1.472       | 1.485       |
|                              | p=0.238     | p=0.304     | p=0.110     | p=0.070     | p=0.141     | p=0.138     |
|                              | (-0.019 ,   | (-0.027 ,   | (-0.039 ,   | (-0.001 ,   | (-0.003 ,   | (-0.004 ,   |
|                              | 0.005)      | 0.009)      | 0.004)      | 0.016)      | 0.024)      | 0.029)      |
| Any Use of Other Drugs       | -0.005      | 0.001       | -0.003      | 0.001       | 0.004       | 0.004       |
|                              | -1.033      | 0.118       | -0.363      | 0.356       | 0.765       | 0.729       |
|                              | p=0.302     | p=0.906     | p=0.717     | p=0.722     | p=0.445     | p=0.466     |
|                              | (-0.014 ,   | (-0.013 ,   | (-0.019 ,   | (-0.005 ,   | (-0.006 ,   | (-0.007 ,   |
|                              | 0.004)      | 0.015)      | 0.013)      | 0.007)      | 0.014)      | 0.016)      |
| Corrected Mental Health Flag | 0.014       | 0.021       | 0.016       | 0.000       | 0.004       | 0.008       |
|                              | 3.296       | 3.504       | 2.318       | 0.125       | 1.086       | 1.674       |
|                              | p<0.001     | p<0.001     | p=0.020     | p=0.900     | p=0.277     | p=0.094     |
|                              | (0.006 ,    | (0.009 ,    | (0.002 ,    | (-0.004 ,   | (-0.004 ,   | (-0.001 ,   |
|                              | 0.022)      | 0.033)      | 0.029)      | 0.005)      | 0.013)      | 0.018)      |
| 2004 Sentence Year           | -0.006      | -0.012      | -0.017      | -0.000      | 0.001       | -0.007      |
|                              | -1.237      | -1.735      | -2.145      | -0.017      | 0.243       | -1.269      |
|                              | p=0.216     | p=0.083     | p=0.032     | p=0.986     | p=0.808     | p=0.204     |
|                              | (-0.014 ,   | (-0.025 ,   | (-0.032 , - | (-0.005 ,   | (-0.008 ,   | (-0.018 ,   |
|                              | 0.003)      | 0.001)      | 0.001)      | 0.005)      | 0.010)      | 0.004)      |
| 2005 Sentence Year           | -0.006      | -0.031      | -0.041      | -0.006      | -0.017      | -0.028      |
|                              | -1.246      | -4.582      | -4.994      | -2.098      | -3.633      | -4.988      |
|                              | p=0.213     | p<0.001     | p<0.001     | p=0.036     | p<0.001     | p<0.001     |
|                              | (-0.015 ,   | (-0.045 , - | (-0.057 , - | (-0.011 , - | (-0.026 , - | (-0.040 , - |
|                              | 0.003)      | 0.018)      | 0.025)      | 0.000)      | 0.008)      | 0.017)      |
| 2006 Sentence Year           | -0.012      | -0.030      | -0.036      | -0.006      | -0.021      | -0.036      |
|                              | -2.463      | -4.203      | -4.037      | -2.200      | -4.354      | -6.044      |
|                              | p=0.014     | p<0.001     | p<0.001     | p=0.028     | p<0.001     | p<0.001     |
|                              | (-0.021 , - | (-0.044 , - | (-0.053 , - | (-0.011 , - | (-0.030 , - | (-0.047 , - |
|                              | 0.002)      | 0.016)      | 0.018)      | 0.001)      | 0.011)      | 0.024)      |
| 3, Allegan County            | -0.001      | 0.013       | 0.007       | -0.008      | -0.004      | -0.012      |
|                              | -0.063      | 0.590       | 0.258       | -1.021      | -0.222      | -0.647      |
|                              | p=0.950     | p=0.555     | p=0.796     | p=0.307     | p=0.824     | p=0.517     |
|                              | (-0.031 ,   | (-0.031 ,   | (-0.046 ,   | (-0.025 ,   | (-0.036 ,   | (-0.050 ,   |

|                      |             |             |             |           |           |           |
|----------------------|-------------|-------------|-------------|-----------|-----------|-----------|
| 5, Antrim County     | 0.029)      | 0.058)      | 0.061)      | 0.008)    | 0.028)    | 0.025)    |
|                      | -0.005      | 0.016       | 0.064       | -0.004    | 0.012     | 0.026     |
|                      | -0.247      | 0.362       | 1.058       | -1.029    | 0.417     | 0.738     |
|                      | p=0.805     | p=0.718     | p=0.290     | p=0.303   | p=0.676   | p=0.461   |
| 9, Bay County        | (-0.049 ,   | (-0.072 ,   | (-0.055 ,   | (-0.013 , | (-0.045 , | (-0.044 , |
|                      | 0.038)      | 0.104)      | 0.183)      | 0.004)    | 0.069)    | 0.096)    |
|                      | 0.021       | 0.016       | 0.010       | 0.005     | 0.011     | -0.004    |
|                      | 1.261       | 0.694       | 0.375       | 0.530     | 0.615     | -0.196    |
| 11, Berrien County   | p=0.207     | p=0.488     | p=0.708     | p=0.596   | p=0.538   | p=0.845   |
|                      | (-0.011 ,   | (-0.029 ,   | (-0.041 ,   | (-0.013 , | (-0.023 , | (-0.043 , |
|                      | 0.053)      | 0.060)      | 0.060)      | 0.023)    | 0.044)    | 0.035)    |
|                      | 0.025       | 0.022       | 0.010       | 0.001     | -0.005    | -0.012    |
| 13, Calhoun County   | 1.534       | 1.040       | 0.411       | 0.133     | -0.360    | -0.682    |
|                      | p=0.125     | p=0.298     | p=0.681     | p=0.895   | p=0.719   | p=0.495   |
|                      | (-0.007 ,   | (-0.020 ,   | (-0.037 ,   | (-0.017 , | (-0.034 , | (-0.046 , |
|                      | 0.058)      | 0.064)      | 0.056)      | 0.019)    | 0.024)    | 0.022)    |
| 19, Clinton County   | -0.004      | 0.001       | 0.005       | -0.002    | -0.015    | -0.025    |
|                      | -0.326      | 0.035       | 0.287       | -0.316    | -1.365    | -1.916    |
|                      | p=0.745     | p=0.972     | p=0.774     | p=0.752   | p=0.172   | p=0.055   |
|                      | (-0.026 ,   | (-0.031 ,   | (-0.031 ,   | (-0.016 , | (-0.037 , | (-0.051 , |
| 22, Dickinson County | 0.019)      | 0.032)      | 0.042)      | 0.011)    | 0.007)    | 0.001)    |
|                      | -0.046      | -0.100      | -0.106      | -0.009    | -0.036    | -0.043    |
|                      | -2.852      | -2.990      | -2.577      | -0.626    | -1.631    | -1.522    |
|                      | p=0.004     | p=0.003     | p=0.010     | p=0.531   | p=0.103   | p=0.128   |
| 23, Eaton County     | (-0.078 , - | (-0.165 , - | (-0.186 , - | (-0.035 , | (-0.078 , | (-0.098 , |
|                      | 0.014)      | 0.034)      | 0.025)      | 0.018)    | 0.007)    | 0.012)    |
|                      | 0.037       | 0.062       | 0.122       | 0.013     | 0.015     | 0.034     |
|                      | 1.134       | 1.337       | 2.208       | 0.581     | 0.493     | 0.872     |
| 23, Eaton County     | p=0.257     | p=0.181     | p=0.027     | p=0.561   | p=0.622   | p=0.383   |
|                      | (-0.027 ,   | (-0.029 ,   | (0.014 ,    | (-0.032 , | (-0.045 , | (-0.042 , |
|                      | 0.101)      | 0.154)      | 0.230)      | 0.058)    | 0.075)    | 0.110)    |
|                      | 0.005       | 0.027       | 0.021       | -0.008    | -0.010    | 0.003     |
| 23, Eaton County     | 0.322       | 1.098       | 0.735       | -0.984    | -0.595    | 0.150     |
|                      | p=0.747     | p=0.272     | p=0.463     | p=0.325   | p=0.552   | p=0.881   |
|                      | (-0.028 ,   | (-0.021 ,   | (-0.034 ,   | (-0.024 , | (-0.041 , | (-0.036 , |

|                           |           |             |           |             |             |             |
|---------------------------|-----------|-------------|-----------|-------------|-------------|-------------|
|                           | 0.039)    | 0.075)      | 0.075)    | 0.008)      | 0.022)      | 0.042)      |
| 25, Genesee County        | -0.006    | -0.029      | -0.022    | -0.007      | -0.023      | -0.032      |
|                           | -0.625    | -2.192      | -1.364    | -1.451      | -2.674      | -2.985      |
|                           | p=0.532   | p=0.028     | p=0.172   | p=0.147     | p=0.007     | p=0.003     |
|                           | (-0.023 , | (-0.056 , - | (-0.054 , | (-0.016 ,   | (-0.040 , - | (-0.053 , - |
|                           | 0.012)    | 0.003)      | 0.010)    | 0.002)      | 0.006)      | 0.011)      |
| 28, Grand Traverse County | -0.028    | -0.044      | 0.005     | -0.011      | -0.018      | -0.049      |
|                           | -1.508    | -1.403      | 0.109     | -2.744      | -0.947      | -2.225      |
|                           | p=0.131   | p=0.161     | p=0.913   | p=0.006     | p=0.344     | p=0.026     |
|                           | (-0.065 , | (-0.106 ,   | (-0.080 , | (-0.019 , - | (-0.055 ,   | (-0.093 , - |
|                           | 0.009)    | 0.017)      | 0.090)    | 0.003)      | 0.019)      | 0.006)      |
| 29, Gratiot County        | -0.018    | -0.005      | -0.039    | -0.001      | -0.036      | -0.011      |
|                           | -0.660    | -0.101      | -0.730    | -0.060      | -1.310      | -0.285      |
|                           | p=0.510   | p=0.920     | p=0.465   | p=0.952     | p=0.190     | p=0.776     |
|                           | (-0.070 , | (-0.093 ,   | (-0.144 , | (-0.045 ,   | (-0.091 ,   | (-0.086 ,   |
|                           | 0.035)    | 0.084)      | 0.066)    | 0.042)      | 0.018)      | 0.064)      |
| 33, Ingham County         | -0.004    | -0.011      | -0.019    | 0.002       | -0.005      | -0.015      |
|                           | -0.381    | -0.718      | -1.070    | 0.297       | -0.409      | -1.110      |
|                           | p=0.703   | p=0.473     | p=0.285   | p=0.767     | p=0.682     | p=0.267     |
|                           | (-0.027 , | (-0.043 ,   | (-0.055 , | (-0.012 ,   | (-0.027 ,   | (-0.041 ,   |
|                           | 0.018)    | 0.020)      | 0.016)    | 0.016)      | 0.017)      | 0.011)      |
| 34, Ionia County          | -0.021    | -0.001      | 0.032     | -0.004      | 0.007       | 0.013       |
|                           | -1.342    | -0.047      | 0.958     | -0.332      | 0.348       | 0.527       |
|                           | p=0.180   | p=0.963     | p=0.338   | p=0.740     | p=0.728     | p=0.598     |
|                           | (-0.053 , | (-0.054 ,   | (-0.034 , | (-0.028 ,   | (-0.032 ,   | (-0.034 ,   |
|                           | 0.010)    | 0.052)      | 0.098)    | 0.020)      | 0.046)      | 0.060)      |
| 35, Iosco County          | -0.016    | -0.034      | 0.031     | -0.018      | -0.050      | -0.043      |
|                           | -0.585    | -0.704      | 0.479     | -3.617      | -2.386      | -1.444      |
|                           | p=0.559   | p=0.481     | p=0.632   | p<0.001     | p=0.017     | p=0.149     |
|                           | (-0.069 , | (-0.127 ,   | (-0.095 , | (-0.028 , - | (-0.091 , - | (-0.101 ,   |
|                           | 0.037)    | 0.060)      | 0.157)    | 0.008)      | 0.009)      | 0.015)      |
| 37, Isabella County       | 0.017     | 0.024       | 0.002     | -0.001      | -0.004      | -0.001      |
|                           | 0.751     | 0.730       | 0.067     | -0.110      | -0.188      | -0.020      |
|                           | p=0.452   | p=0.465     | p=0.947   | p=0.912     | p=0.851     | p=0.984     |
|                           | (-0.028 , | (-0.040 ,   | (-0.067 , | (-0.025 ,   | (-0.048 ,   | (-0.054 ,   |

|                       |           |             |             |           |             |             |
|-----------------------|-----------|-------------|-------------|-----------|-------------|-------------|
|                       | 0.063)    | 0.088)      | 0.072)      | 0.023)    | 0.040)      | 0.053)      |
| 38, Jackson County    | 0.005     | 0.032       | 0.034       | -0.007    | -0.019      | -0.014      |
|                       | 0.391     | 1.601       | 1.532       | -0.918    | -1.454      | -0.884      |
|                       | p=0.696   | p=0.109     | p=0.126     | p=0.359   | p=0.146     | p=0.377     |
|                       | (-0.021 , | (-0.007 ,   | (-0.010 ,   | (-0.022 , | (-0.045 ,   | (-0.046 ,   |
|                       | 0.032)    | 0.071)      | 0.078)      | 0.008)    | 0.007)      | 0.017)      |
| 39, Kalamazoo County  | 0.009     | 0.015       | 0.015       | -0.001    | -0.014      | -0.022      |
|                       | 0.726     | 0.868       | 0.787       | -0.139    | -1.155      | -1.486      |
|                       | p=0.468   | p=0.385     | p=0.431     | p=0.890   | p=0.248     | p=0.137     |
|                       | (-0.015 , | (-0.019 ,   | (-0.023 ,   | (-0.015 , | (-0.038 ,   | (-0.050 ,   |
|                       | 0.034)    | 0.049)      | 0.054)      | 0.013)    | 0.010)      | 0.007)      |
| 41, Kent County       | -0.010    | -0.026      | -0.029      | -0.007    | -0.029      | -0.036      |
|                       | -1.233    | -2.123      | -2.011      | -1.457    | -3.475      | -3.603      |
|                       | p=0.217   | p=0.034     | p=0.044     | p=0.145   | p<0.001     | p<0.001     |
|                       | (-0.027 , | (-0.050 , - | (-0.056 , - | (-0.017 , | (-0.045 , - | (-0.056 , - |
|                       | 0.006)    | 0.002)      | 0.001)      | 0.002)    | 0.013)      | 0.017)      |
| 44, Lapeer County     | 0.036     | 0.056       | 0.062       | -0.005    | 0.008       | 0.012       |
|                       | 1.512     | 1.806       | 1.704       | -0.428    | 0.398       | 0.489       |
|                       | p=0.131   | p=0.071     | p=0.088     | p=0.669   | p=0.691     | p=0.625     |
|                       | (-0.011 , | (-0.005 ,   | (-0.009 ,   | (-0.026 , | (-0.032 ,   | (-0.035 ,   |
|                       | 0.083)    | 0.117)      | 0.132)      | 0.017)    | 0.048)      | 0.059)      |
| 46, Lenawee County    | 0.028     | 0.041       | 0.086       | 0.005     | -0.010      | -0.001      |
|                       | 1.313     | 1.403       | 2.519       | 0.394     | -0.489      | -0.051      |
|                       | p=0.189   | p=0.161     | p=0.012     | p=0.694   | p=0.625     | p=0.959     |
|                       | (-0.014 , | (-0.016 ,   | (0.019 ,    | (-0.018 , | (-0.049 ,   | (-0.049 ,   |
|                       | 0.069)    | 0.099)      | 0.153)      | 0.028)    | 0.029)      | 0.047)      |
| 47, Livingston County | -0.005    | 0.021       | 0.015       | -0.005    | 0.009       | 0.002       |
|                       | -0.506    | 1.296       | 0.786       | -0.657    | 0.690       | 0.152       |
|                       | p=0.613   | p=0.195     | p=0.432     | p=0.511   | p=0.490     | p=0.880     |
|                       | (-0.024 , | (-0.011 ,   | (-0.023 ,   | (-0.018 , | (-0.017 ,   | (-0.027 ,   |
|                       | 0.014)    | 0.052)      | 0.054)      | 0.009)    | 0.035)      | 0.032)      |
| 50, Macomb County     | -0.006    | -0.003      | -0.019      | -0.002    | -0.013      | -0.027      |
|                       | -0.762    | -0.231      | -1.476      | -0.537    | -1.675      | -2.854      |
|                       | p=0.446   | p=0.817     | p=0.140     | p=0.591   | p=0.094     | p=0.004     |
|                       | (-0.020 , | (-0.024 ,   | (-0.044 ,   | (-0.012 , | (-0.029 ,   | (-0.045 , - |



|                     |           |           |           |             |             |             |
|---------------------|-----------|-----------|-----------|-------------|-------------|-------------|
|                     | 0.009)    | 0.019)    | 0.006)    | 0.007)      | 0.002)      | 0.008)      |
| 56, Midland County  | -0.001    | -0.003    | -0.006    | -0.011      | -0.014      | -0.037      |
|                     | -0.071    | -0.121    | -0.248    | -1.241      | -0.887      | -2.144      |
|                     | p=0.944   | p=0.903   | p=0.804   | p=0.215     | p=0.375     | p=0.032     |
|                     | (-0.030 , | (-0.046 , | (-0.058 , | (-0.027 ,   | (-0.044 ,   | (-0.072 , - |
|                     | 0.027)    | 0.041)    | 0.045)    | 0.006)      | 0.017)      | 0.003)      |
| 58, Monroe County   | 0.012     | 0.029     | 0.025     | -0.000      | -0.011      | -0.015      |
|                     | 0.719     | 1.229     | 0.921     | -0.005      | -0.673      | -0.744      |
|                     | p=0.472   | p=0.219   | p=0.357   | p=0.996     | p=0.501     | p=0.457     |
|                     | (-0.020 , | (-0.017 , | (-0.028 , | (-0.020 ,   | (-0.044 ,   | (-0.055 ,   |
|                     | 0.043)    | 0.075)    | 0.078)    | 0.020)      | 0.022)      | 0.025)      |
| 59, Montcalm County | 0.017     | 0.060     | 0.041     | 0.003       | 0.015       | 0.027       |
|                     | 1.052     | 2.400     | 1.464     | 0.298       | 0.846       | 1.311       |
|                     | p=0.293   | p=0.016   | p=0.143   | p=0.765     | p=0.397     | p=0.190     |
|                     | (-0.015 , | (0.011 ,  | (-0.014 , | (-0.016 ,   | (-0.019 ,   | (-0.013 ,   |
|                     | 0.050)    | 0.108)    | 0.097)    | 0.022)      | 0.049)      | 0.068)      |
| 61, Muskegon County | -0.002    | 0.001     | 0.010     | -0.005      | -0.001      | 0.007       |
|                     | -0.141    | 0.041     | 0.543     | -0.814      | -0.070      | 0.518       |
|                     | p=0.888   | p=0.967   | p=0.587   | p=0.416     | p=0.944     | p=0.605     |
|                     | (-0.023 , | (-0.031 , | (-0.026 , | (-0.018 ,   | (-0.023 ,   | (-0.019 ,   |
|                     | 0.020)    | 0.032)    | 0.046)    | 0.007)      | 0.021)      | 0.033)      |
| 62, Newaygo County  | -0.013    | -0.000    | -0.013    | -0.026      | -0.042      | -0.037      |
|                     | -0.813    | -0.004    | -0.391    | -4.278      | -2.647      | -1.679      |
|                     | p=0.416   | p=0.997   | p=0.696   | p<0.001     | p=0.008     | p=0.093     |
|                     | (-0.046 , | (-0.055 , | (-0.076 , | (-0.038 , - | (-0.073 , - | (-0.079 ,   |
|                     | 0.019)    | 0.055)    | 0.051)    | 0.014)      | 0.011)      | 0.006)      |
| 64, Oceana County   | -0.012    | 0.019     | -0.010    | -0.018      | -0.011      | 0.001       |
|                     | -0.454    | 0.447     | -0.207    | -1.748      | -0.448      | 0.041       |
|                     | p=0.650   | p=0.655   | p=0.836   | p=0.081     | p=0.654     | p=0.968     |
|                     | (-0.063 , | (-0.064 , | (-0.102 , | (-0.038 ,   | (-0.058 ,   | (-0.065 ,   |
|                     | 0.039)    | 0.102)    | 0.083)    | 0.002)      | 0.037)      | 0.068)      |
| 70, Ottawa County   | 0.010     | 0.013     | 0.011     | -0.000      | 0.001       | -0.009      |
|                     | 0.854     | 0.823     | 0.586     | -0.050      | 0.079       | -0.637      |
|                     | p=0.393   | p=0.411   | p=0.558   | p=0.960     | p=0.937     | p=0.524     |
|                     | (-0.013 , | (-0.018 , | (-0.026 , | (-0.015 ,   | (-0.023 ,   | (-0.036 ,   |

|                                 |             |             |             |           |             |             |
|---------------------------------|-------------|-------------|-------------|-----------|-------------|-------------|
|                                 | 0.034)      | 0.045)      | 0.048)      | 0.014)    | 0.024)      | 0.019)      |
| 73, Saginaw County              | -0.018      | -0.029      | -0.050      | -0.005    | -0.020      | -0.029      |
|                                 | -1.542      | -1.731      | -2.626      | -0.709    | -1.752      | -2.048      |
|                                 | p=0.123     | p=0.083     | p=0.009     | p=0.479   | p=0.080     | p=0.041     |
|                                 | (-0.040 ,   | (-0.062 ,   | (-0.087 , - | (-0.017 , | (-0.043 ,   | (-0.057 , - |
|                                 | 0.005)      | 0.004)      | 0.013)      | 0.008)    | 0.002)      | 0.001)      |
| 77, St. Clair County            | -0.010      | -0.011      | 0.007       | -0.001    | -0.008      | -0.017      |
|                                 | -0.975      | -0.701      | 0.354       | -0.083    | -0.687      | -1.244      |
|                                 | p=0.330     | p=0.483     | p=0.723     | p=0.934   | p=0.492     | p=0.213     |
|                                 | (-0.029 ,   | (-0.042 ,   | (-0.032 ,   | (-0.015 , | (-0.031 ,   | (-0.045 ,   |
|                                 | 0.010)      | 0.020)      | 0.046)      | 0.014)    | 0.015)      | 0.010)      |
| 78, St. Joseph County           | -0.006      | -0.022      | -0.015      | -0.004    | -0.006      | -0.035      |
|                                 | -0.266      | -0.702      | -0.410      | -0.258    | -0.273      | -1.339      |
|                                 | p=0.790     | p=0.483     | p=0.682     | p=0.796   | p=0.785     | p=0.181     |
|                                 | (-0.051 ,   | (-0.083 ,   | (-0.086 ,   | (-0.034 , | (-0.053 ,   | (-0.086 ,   |
|                                 | 0.039)      | 0.039)      | 0.056)      | 0.026)    | 0.040)      | 0.016)      |
| 81, Washtenaw County            | 0.003       | -0.017      | -0.037      | 0.000     | -0.022      | -0.028      |
|                                 | 0.237       | -1.090      | -2.062      | 0.025     | -1.941      | -2.073      |
|                                 | p=0.812     | p=0.276     | p=0.039     | p=0.980   | p=0.052     | p=0.038     |
|                                 | (-0.019 ,   | (-0.048 ,   | (-0.073 , - | (-0.014 , | (-0.043 ,   | (-0.055 , - |
|                                 | 0.025)      | 0.014)      | 0.002)      | 0.014)    | 0.000)      | 0.002)      |
| 84, Wayne County , AOI Docket   | -0.001      | 0.006       | -0.006      | 0.005     | 0.003       | -0.001      |
|                                 | -0.067      | 0.481       | -0.410      | 0.856     | 0.363       | -0.061      |
|                                 | p=0.947     | p=0.630     | p=0.682     | p=0.392   | p=0.716     | p=0.951     |
|                                 | (-0.017 ,   | (-0.018 ,   | (-0.033 ,   | (-0.006 , | (-0.014 ,   | (-0.021 ,   |
|                                 | 0.016)      | 0.030)      | 0.021)      | 0.015)    | 0.020)      | 0.019)      |
| 85, Wayne County , Trial Docket | -0.014      | -0.031      | -0.043      | -0.002    | -0.015      | -0.024      |
|                                 | -2.029      | -2.950      | -3.472      | -0.372    | -2.113      | -2.701      |
|                                 | p=0.042     | p=0.003     | p<0.001     | p=0.710   | p=0.035     | p=0.007     |
|                                 | (-0.028 , - | (-0.052 , - | (-0.068 , - | (-0.010 , | (-0.030 , - | (-0.041 , - |
|                                 | 0.000)      | 0.010)      | 0.019)      | 0.007)    | 0.001)      | 0.007)      |
| Constant                        | -0.001      | -0.028      | 0.002       | 0.011     | 0.021       | 0.023       |
|                                 | -0.101      | -1.432      | 0.081       | 1.322     | 1.527       | 1.389       |
|                                 | p=0.919     | p=0.152     | p=0.936     | p=0.186   | p=0.127     | p=0.165     |
|                                 | (-0.028 ,   | (-0.067 ,   | (-0.042 ,   | (-0.005 , | (-0.006 ,   | (-0.009 ,   |

|                    |         |         |         |         |         |         |
|--------------------|---------|---------|---------|---------|---------|---------|
|                    | 0.025)  | 0.010)  | 0.046)  | 0.028)  | 0.048)  | 0.055)  |
| Observations       | 28,070  | 26,180  | 23,697  | 29,310  | 28,476  | 27,132  |
| Wald Chi2          | 614.5   | 1437    | 1871    | 309     | 862.2   | 1370    |
| Degrees of Freedom | 67      | 67      | 67      | 67      | 67      | 67      |
| P-value            | p<0.001 | p<0.001 | p<0.001 | p<0.001 | p<0.001 | p<0.001 |
| R-squared          | 0.021   | 0.049   | 0.066   | 0.005   | 0.023   | 0.039   |

---

Each cell contains unstandardized beta coefficient, z-statistic, p-value from two tailed test, and 95% confidence interval in parentheses.
